# Supplementary material for: Multistep synthesis and X-ray structures of carboxyl-terminated hybrid iron(ii) phthalocyaninatoclathrochelates and their postsynthetic transformation into polytopic carboranyl-containing derivatives
Source: Royal Society of Chemistry journal article supplement (doi:10.1039/d3dt00076a), 2023-01-01
Supplement: d3dt00076a1.pdf [file d3dt00076a1.pdf]

## Supporting Information

for

# **Multistep synthesis and X-ray structure of the carboxyl-terminated hybrid iron(II) phthalocyaninatoclathrochelates and their postsynthetic transformation into polytopic carboranyl-containing derivatives**

Alexander S. Chuprin<sup>a</sup>, Alexander A. Pavlov<sup>a,b</sup>, Anna V. Vologzhanina<sup>a</sup>,  
Pavel V. Dorovatovskii<sup>c</sup>, Anton V. Makarenkov<sup>a</sup>, Valentina A. Olshevskaya<sup>a</sup>,  
Semyon V. Dudkin<sup>a</sup>, and Yan Z. Voloshin<sup>a,d</sup>

*<sup>a</sup>Nesmeyanov Institute of Organoelement Compounds of the Russian Academy of Sciences, 28 bld 1. Vavilova st., 119334 Moscow, Russia*

*<sup>b</sup>BMSTU Center of National Technological Initiative "Digital Material Science: New Material and Substances", Bauman Moscow State Technical University, 2nd Baumanskaya st. 5, 105005, Moscow, Russia*

*<sup>c</sup>National Research Center Kurchatov Institute, 1 Kurchatova pl., 123098, Moscow, Russia*

*<sup>d</sup>Kurnakov Institute of General and Inorganic Chemistry of the Russian Academy of Sciences, 31 Leninsky pr., 119991 Moscow, Russia*

@Corresponding author E-mail: [voloshin@ineos.ac.ru](mailto:voloshin@ineos.ac.ru)

**Analytical and Spectral data***Fe(HNx)<sub>2</sub>Nx(B4-C<sub>6</sub>H<sub>4</sub>COOH)*

Anal. calcd. for C<sub>25</sub>H<sub>31</sub>BFeN<sub>6</sub>O<sub>8</sub>: C, 49.21; H, 5.12; N, 13.77. Found (%): C, 49.45; H, 5.03; N, 13.91. HR MS (MALDI-TOF): *m/z*: 611.0266 [M + H]<sup>+</sup>. <sup>1</sup>H NMR (CD<sub>2</sub>Cl<sub>2</sub>, δ, ppm): 1.77 (s, 12H, β-CH<sub>2</sub>), 2.88 (s, 12H, α-CH<sub>2</sub>), 7.77 (d, 2H, 3-Ar), 8.02 (d, 2H, 2-Ar). <sup>13</sup>C{<sup>1</sup>H} NMR (CD<sub>2</sub>Cl<sub>2</sub>, δ, ppm): 22.03 (s, β'-CH<sub>2</sub>), 22.14 (s, β-CH<sub>2</sub>), 26.94 (s, α'-CH<sub>2</sub>), 27.00 (s, α-CH<sub>2</sub>), 129.34 (s, 2-Ar), 132.33 (s, 3-Ar), 156.03 (s, HON=C, BON=C), 170.98 (s, COOH). Deconvoluted UV-vis (CH<sub>2</sub>Cl<sub>2</sub>): ν<sub>max</sub>, cm<sup>-1</sup> (ε · 10<sup>-3</sup>, mol<sup>-1</sup> L cm<sup>-1</sup>): 42475 (23), 40264 (3.2), 34171 (7.8), 30173 (3.0), 25620 (1.1), 21039 (6.8), 19661 (1.0).

*FeNx<sub>3</sub>(B4-C<sub>6</sub>H<sub>4</sub>COOH)(ZrPc)*

Anal. Calcd. for C<sub>57</sub>H<sub>45</sub>N<sub>14</sub>O<sub>8</sub>FeBZr: C, 56.49; H, 3.74; N, 16.18. Found (%): C, 56.66; H, 3.79; N, 16.03. HR MS (MALDI-TOF): *m/z*: 1211.2831 [M]<sup>+</sup>. <sup>1</sup>H NMR (pyridine-*d*<sub>5</sub>, δ, ppm): 0.72 (s, 12H, β-CH<sub>2</sub>, β'-CH<sub>2</sub>), 1.30 (m, 6H, α'-CH<sub>2</sub>), 2.08 (t, 6H, α-CH<sub>2</sub>), 5.09 (br. s, 1H, COOH), 7.94 (d, 2H, 3-Ar), 8.35 (m, 8H, β-Pc), 8.41 (d, 2H, 2-Ar), 9.77 (m, 8H, α-Pc). <sup>13</sup>C{<sup>1</sup>H} NMR (pyridine-*d*<sub>5</sub>, δ, ppm): 21.16 (s, β'-CH<sub>2</sub>), 21.38 (s, β-CH<sub>2</sub>), 25.39 (s, α'-CH<sub>2</sub>), 26.01 (s, α-CH<sub>2</sub>), 124.16 (s, α-Pc), 126.28 (s, 4-Ar), 129.15 (s, 3-Ar), 131.48 (s, β-Pc), 132.78 (s, 2-Ar), 138.26 (s, C(Pc)), 152.45 (s, C=N (Hf-capped)), 153.72 (s, C=N (B-capped)), 154.62 (s, C=N (Pc)), 169.94 (s, COOH). Deconvoluted UV-vis (C<sub>5</sub>H<sub>5</sub>N): ν<sub>max</sub>, cm<sup>-1</sup> (ε · 10<sup>-3</sup>, mol<sup>-1</sup> L cm<sup>-1</sup>): 30501 (45), 29714 (24), 28408 (23), 27802 (19), 22328 (5.5), 20677 (12), 18131 (1.3), 17284 (5.5), 16809 (4.0), 16120 (13), 15973 (28), 15132 (32), 14893 (8.1), 14489 (224), 14322 (14).

*FeNx<sub>3</sub>(B4-C<sub>6</sub>H<sub>4</sub>COOH)(HfPc)*

Anal. Calcd. for C<sub>57</sub>H<sub>45</sub>N<sub>14</sub>O<sub>8</sub>FeBHf: C, 52.70; H, 3.49; N, 15.09. Found (%): C, 52.47; H, 3.60; N, 14.92. HR MS (MALDI-TOF): *m/z*: 1299.3449 [M]<sup>+</sup>. <sup>1</sup>H NMR (pyridine-*d*<sub>5</sub>, δ, ppm): 0.74 (s, 12H, β-CH<sub>2</sub>, β'-CH<sub>2</sub>), 1.38 (t, 6H, α'-CH<sub>2</sub>), 2.07 (t, 6H, α-CH<sub>2</sub>), 5.05 (br. s, 1H, COOH + H<sub>2</sub>O), 7.95 (d, 2H, 3-Ar), 8.37 (m,

8H,  $\beta$ -Pc), 8.41 (d, 2H, 2-Ar), 9.81 (m, 8H,  $\alpha$ -Pc).  $^{13}\text{C}\{^1\text{H}\}$  NMR (pyridine- $d_5$ ,  $\delta$ , ppm): 21.18 (s,  $\beta'$ -CH<sub>2</sub>), 21.45 (s,  $\beta$ -CH<sub>2</sub>), 25.41 (s,  $\alpha'$ -CH<sub>2</sub>), 26.02 (s,  $\alpha$ -CH<sub>2</sub>), 124.16 (s,  $\alpha$ -Pc), 129.15 (s, 3-Ar), 131.57 (s,  $\beta$ -Pc), 132.80 (s, 2-Ar), 138.34 (s, C(Pc)), 152.99 (s, C=N (Hf-capped)), 153.60 (s, C=N (B-capped)), 154.92 (s, C=N (Pc)). Deconvoluted UV-vis (C<sub>5</sub>H<sub>5</sub>N):  $\nu_{\text{max}}$ , cm<sup>-1</sup> ( $\epsilon \cdot 10^{-3}$ , mol<sup>-1</sup> L cm<sup>-1</sup>): 30180 (50), 29544 (25), 28338 (26), 27100 (8.3), 22909 (5.9), 20846 (16), 17788 (3.2), 17293 (4.1), 16824 (3.7), 16123 (13), 15961 (27), 15137 (30), 14904 (9.9), 14494 (215), 14343 (12).

*Fe(HNx)<sub>2</sub>Nx(B4-C<sub>6</sub>H<sub>4</sub>COProp)*

Anal. Calcd. for C<sub>28</sub>H<sub>34</sub>N<sub>7</sub>O<sub>7</sub>FeB: C, 51.96; H, 5.29; N, 15.15. Found (%): C, 52.06; H, 5.23; N, 15.00. HR MS (MALDI-TOF):  $m/z$ : 648.1949 [M + H]<sup>+</sup>.  $^1\text{H}$  NMR (CD<sub>2</sub>Cl<sub>2</sub>,  $\delta$ , ppm): 1.75 (s, 12H,  $\beta$ -CH<sub>2</sub>), 2.33 (t, 1H, NHCH<sub>2</sub>CCH), 2.88 (s, 12H,  $\alpha$ -CH<sub>2</sub>), 4.23 (m, dd, 2H, NHCH<sub>2</sub>CCH), 6.38 (t, 1H, NHCH<sub>2</sub>CCH), 7.71 (dd, 4H, Ph).  $^{13}\text{C}\{^1\text{H}\}$  NMR (CD<sub>2</sub>Cl<sub>2</sub>,  $\delta$ , ppm): 22.04 (s,  $\beta'$ -CH<sub>2</sub>), 22.14 (s,  $\beta$ -CH<sub>2</sub>), 26.95 (s,  $\alpha'$ -CH<sub>2</sub>), 27.01 (s,  $\alpha$ -CH<sub>2</sub>), 30.01 (s, NHCH<sub>2</sub>CCH), 71.61 (s, NHCH<sub>2</sub>CCH), 80.57 (s, NHCH<sub>2</sub>CCH), 126.24 (s, Ph), 132.42 (s, Ph), 155.95, 156.04 (two s, HON=C, BON=C), 167.74 (s, C=O). Deconvoluted UV-vis (CH<sub>2</sub>Cl<sub>2</sub>):  $\nu_{\text{max}}$ , cm<sup>-1</sup> ( $\epsilon \cdot 10^{-3}$ , mol<sup>-1</sup> L cm<sup>-1</sup>): 42949 (26), 39866 (3.8), 34311 (7.8), 30199 (2.2), 25365 (1.3), 21259 (8.6), 19628 (1.9).

*FeNx<sub>3</sub>(B4-C<sub>6</sub>H<sub>4</sub>COProp)(ZrPc)*

Anal. Calcd. for C<sub>60</sub>H<sub>48</sub>N<sub>15</sub>O<sub>7</sub>FeBZr: C, 57.70; H, 3.87; N, 16.82. Found (%): C, 57.86; H, 3.83; N, 16.99. MS (MALDI-TOF):  $m/z$ : 1248.4294 [M]<sup>+</sup>.  $^1\text{H}$  NMR (pyridine- $d_5$ ,  $\delta$ , ppm): 0.66 (s, 12H,  $\beta$ -CH<sub>2</sub>,  $\beta'$ -CH<sub>2</sub>), 1.22 (m, 6H,  $\alpha'$ -CH<sub>2</sub>), 2.00 (t, 6H,  $\alpha$ -CH<sub>2</sub>), 2.99 (s, 1H, NHCH<sub>2</sub>CCH), 4.41 (s, 2H, NHCH<sub>2</sub>CCH), 7.86 (d, 2H, 3-Ar), 8.22 (d, 2H, 2-Ar), 8.31 (m, 8H,  $\beta$ -Pc), 9.64 – 9.69 (m, 9H, NH,  $\alpha$ -Pc).  $^{13}\text{C}\{^1\text{H}\}$  NMR (pyridine- $d_5$ ,  $\delta$ , ppm): 21.12 (s,  $\beta'$ -CH<sub>2</sub>), 21.33 (s,  $\beta$ -CH<sub>2</sub>), 25.32 (s,  $\alpha'$ -CH<sub>2</sub>), 25.94 (s,  $\alpha$ -CH<sub>2</sub>), 29.70 (s, NHCH<sub>2</sub>CCH), 72.25 (s, NHCH<sub>2</sub>CCH), 82.31 (s, NHCH<sub>2</sub>CCH), 124.16 (s,  $\alpha$ -Pc), 126.93 (s, 3-Ar), 130.41 (s, C<sub>ipso</sub>(Ar)), 131.39

(s,  $\beta$ -Pc), 132.74 (s, 2-Ar), 138.18 (s, C(Pc)), 152.35 (s, C=N (Zr-capped)), 153.60 (s, C=N (B-capped)), 154.46 (s, C=N (Pc)), 168.30 (s, C=O). Deconvoluted UV-vis ( $C_5H_5N$ ):  $\nu_{max}$ ,  $cm^{-1}$  ( $\epsilon \cdot 10^{-3}$ ,  $mol^{-1} L cm^{-1}$ ): 30598 (43), 29676 (26), 28384 (28), 27454 (13), 22289 (6.5), 20609 (12), 18057 (1.6), 17282 (5.1), 16814 (3.9), 16119 (12), 15969 (27), 15135 (31), 14895 (8.4), 14490 (217), 14307 (13).

*Fe(HNx)<sub>2</sub>Nx(B4-C<sub>6</sub>H<sub>4</sub>COSpCarb)*

Anal. Calcd. for  $C_{31}H_{47}N_{10}O_7FeB_{11}$ : C, 43.98; H, 5.60; N, 16.55. Found (%): C, 43.81 H, 5.38; N, 16.77. HR MS (MALDI-TOF):  $m/z$ : 847.5160 [ $M + H^+$ ]<sup>+</sup>, 869.4871 [ $M + Na^+$ ]<sup>+</sup>, 885.4914 [ $M + K^+$ ]<sup>+</sup>. <sup>1</sup>H NMR ( $CD_2Cl_2$ ,  $\delta$ , ppm): 1.75 (s, 12H,  $\beta$ -CH<sub>2</sub>), 2.02 (br. s, 2H, B-H (Carb)), 2.28 (br. s, 6H, B-H (Carb)), 2.48 (br. s, 1H, B9), 2.55 (br. s, 1H, B12), 2.87 (s, 12H,  $\alpha$ -CH<sub>2</sub>), 3.93 (s, 1H, C-H (Carb)), 4.70 (d, 2H, NHCH<sub>2</sub>), 5.02 (s, 2H, NCH<sub>2</sub>), 6.86 (t, 1H, NH), 7.72 (m, 5H, Ph, 5H-triazole). <sup>11</sup>B{<sup>1</sup>H} NMR ( $CD_2Cl_2$ ,  $\delta$ , ppm): -12.58 (s, 4B, B3, B6, B7, B11), -11.64 (s, 2B, B4, B5), -9.42 (s, 2B, B8, B10), -4.56 (s, 1B, B9), -1.49 (s, 1B, B12), 6.80 (m, 1B, B-Ar). <sup>13</sup>C{<sup>1</sup>H} NMR ( $CD_2Cl_2$ ,  $\delta$ , ppm): 22.05 (s,  $\beta'$ -CH<sub>2</sub>), 22.15 (s,  $\beta$ -CH<sub>2</sub>), 26.93 (s,  $\alpha'$ -CH<sub>2</sub>), 27.00 (s,  $\alpha$ -CH<sub>2</sub>), 35.83 (s, NHCH<sub>2</sub>), 59.77 (s, NCH<sub>2</sub>), 124.47 (s, 5H-triazole), 126.23 (s, Ph), 132.43 (s, Ph), 155.93, 156.00 (two s, HON=C, BON=C). Deconvoluted UV-vis ( $CH_2Cl_2$ ):  $\nu_{max}$ ,  $cm^{-1}$  ( $\epsilon \cdot 10^{-3}$ ,  $mol^{-1} L cm^{-1}$ ): 43343 (33), 39462 (5.5), 35403 (5.5), 32533 (4.6), 25625 (1.8), 21399 (11), 19773 (1.3).

*FeNx<sub>3</sub>(B4-C<sub>6</sub>H<sub>4</sub>COSpCarb)(ZrPc)*

Anal. Calcd. for  $C_{63}H_{61}N_{18}O_7FeB_{11}Zr$ : C, 52.25; H, 4.25; N, 17.41. Found (%): C, 52.41, H, 4.28; N, 17.27. HR MS (MALDI-TOF):  $m/z$ : 1446.8815 [ $M$ ]<sup>+</sup>. <sup>1</sup>H NMR ( $CDCl_3$ ,  $\delta$ , ppm): 1.13 (m, 12H,  $\beta'$ -,  $\beta$ -CH<sub>2</sub>), 1.21 (t, 6H,  $\alpha'$ -CH<sub>2</sub>), 2.03 (br. s, 2H, B-H (Carb)), 2.13 (t, 6H,  $\alpha$ -CH<sub>2</sub>), 2.28 (br. s, 6H, B-H (Carb)), 2.37 (br. s, 1H, B9), 2.48 (br. s, 1H, B12), 3.75 (s, 1H, C-H (Carb)), 4.58 (d, 2H, NHCH<sub>2</sub>), 4.88 (s, 2H, NCH<sub>2</sub>), 6.60 (t, 1H, NH), 7.32 (d, 2H, Ph), 7.43 (d, 2H, Ph), 7.60 (m, 1H, 5H-triazole), 8.22 (m, 8H,  $\beta$ -Pc), 9.50 (m, 8H,  $\alpha$ -Pc), <sup>11</sup>B{<sup>1</sup>H} NMR ( $CDCl_3$ ,

$\delta$ , ppm):  $-12.89$  (s, 4B, B3, B6, B7, B11),  $-11.86$  (s, 2B, B4, B5),  $-9.61$  (s, 2B, B8, B10),  $-4.45$  (s, 1B, B9),  $-1.27$  (s, 1B, B12),  $6.97$  (m, 1B, B-Ar).  $^{13}\text{C}\{^1\text{H}\}$  NMR (pyridine- $d_5$ ,  $\delta$ , ppm):  $21.01$  (s,  $\beta'$ -CH<sub>2</sub>),  $21.21$  (s,  $\beta$ -CH<sub>2</sub>),  $25.18$  (s,  $\alpha'$ -CH<sub>2</sub>),  $25.84$  (s,  $\alpha$ -CH<sub>2</sub>),  $36.28$  (s, NCH<sub>2</sub>),  $59.01$  (s, NHCH<sub>2</sub>),  $124.16$  (s,  $\alpha$ -Pc),  $124.41$  (s, 5H-triazole),  $126.86$  (s, Ph),  $131.25$  (s,  $\beta$ -Pc),  $132.64$  (s, Ph),  $138.00$  (s, C(Pc)),  $152.19$  (s, C=N ( $\alpha$ -CH<sub>2</sub>)),  $153.48$  (s, C=N ( $\alpha'$ -CH<sub>2</sub>)),  $154.18$  (s, C=N (Pc)),  $168.58$  (s, C=O). Deconvoluted UV-vis (C<sub>5</sub>H<sub>5</sub>N):  $\nu_{\text{max}}$ , cm<sup>-1</sup> ( $\epsilon \cdot 10^{-3}$ , mol<sup>-1</sup> L cm<sup>-1</sup>): 30690 (47), 29682 (24), 28373 (30), 27326 (11), 21886 (8.0), 20419 (9.4), 17638 (3.4), 17255 (4.0), 16812 (3.1), 16115 (12), 15943 (27), 15150 (27), 14908 (8.7), 14485 (200), 14354 (17).

### UV-vis spectra

Initial carborane is known to be UV-silent in the spectral range under study (25000 – 43500 cm<sup>-1</sup>). The spectrum of 1-[(*o*-carboran-1'-yl)methyl]-4-pentyl-1,2,3-triazole, used as a model carboranyl-based compound, contains in this range a very low-intensive band with maximum at 37879 cm<sup>-1</sup> (see Table S2); a more intensive band in its UV-vis spectrum appeared at 45450 cm<sup>-1</sup>. A performed functionalization of the propargylamine semiclatrochelatate FeNx(HNx)<sub>2</sub>(B4-C<sub>6</sub>H<sub>4</sub>COProp) using its “click” reaction led to a slight (approximately 1100 cm<sup>-1</sup>) shortwave shift of the corresponding absorption in the spectrum of thus obtained polytopic carboranyl-terminated iron(II) semiclatrochelatate FeNx(HNx)<sub>2</sub>(B4-C<sub>6</sub>H<sub>4</sub>COSpCarb).

### Spin state of the encapsulated iron(II) ion

The low-spin state of all the (pseudo)macrobicyclic iron(II) tris- $\alpha$ -dioximates is due to the following experimental data:

1. from <sup>57</sup>Mössbauer spectra for more than hundred complexes of this type (see, for example, [S1 – S4])
2. from the solution NMR data (the absence of any paramagnetic shift or paramagnetic broadening).

3. from the small values of Fe–N distances (approximately 1.90–1.94 Å), in their X-rayed molecules, as compared with the high-spin iron(II) complexes with nitrogen donor ligands (typically 2.1–2.2 Å). Indeed, the performed analysis of CBSD data for 427 known XRD structures of iron(II) tris(2,2-bipyridinates) and tris(4,10-phenanthrolinates) showed that the averaged Fe–N distance for them is equal to 1.98(2) Å. This value is characteristic of the LS  $Fe^{II}N_6$ -complexes, while those for the analogous HS iron(II) complexes typically exceed 2.1 Å (see, for example, a comparison of the LS and HS iron(II) complexes performed by Lecomte C. and co-authors [S5, S6]).

The experimentally observed increase in (as compared with non-macrocyclic iron(II) tris- $\alpha$ -dioximates) and a very high ligand field strength, characteristic of a given type of iron(II) cage complexes [S1, S2], can be due to the so-called “macrobicyclic effect”. It is caused by formation of their quasiaromatic macrobicyclic and pseudomacrobicyclic polyazomethine ligands.

As a result, all the obtained (pseudo)macrobicyclic iron(II) tris- $\alpha$ -dioximates and their hybrid derivatives are the low-spin  $d^6$  complexes in their ground state.

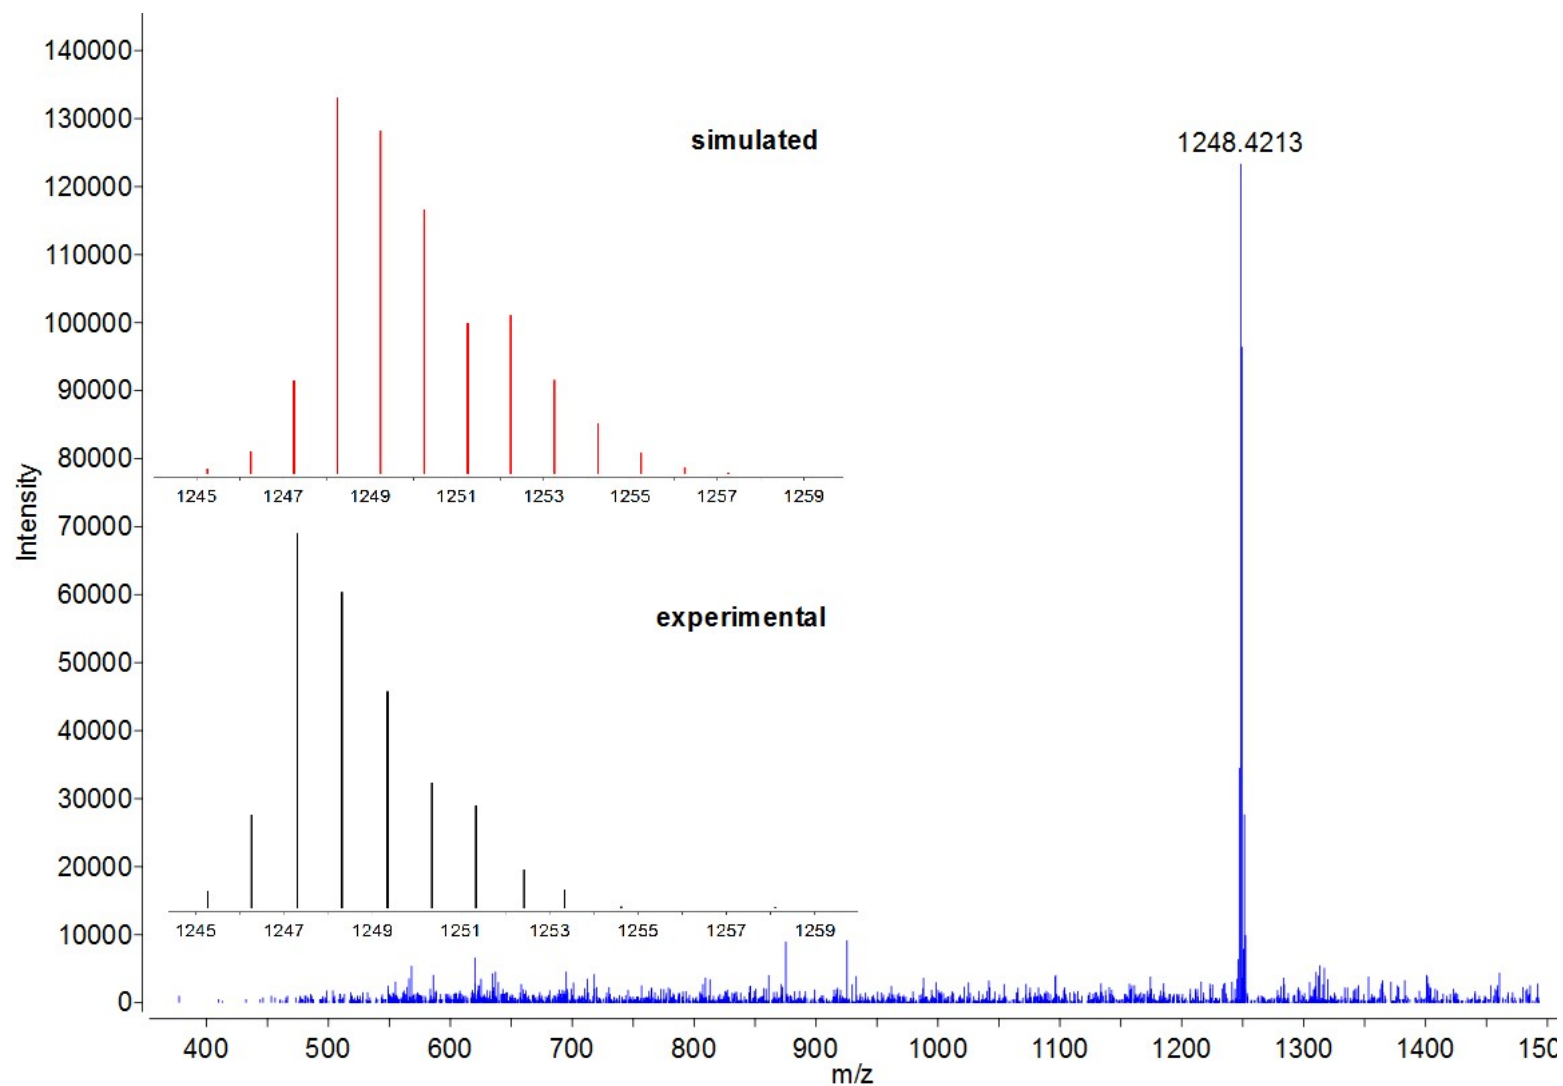

Figure S1. HR MALDI-TOF mass spectrum of the hybrid complex  $\text{FeN}_x\text{}_3(\text{B4-C}_6\text{H}_4\text{COProp})(\text{ZrPc})$ . Inset: the experimental and theoretically calculated isotopic distribution in the peaks of its molecular ion.

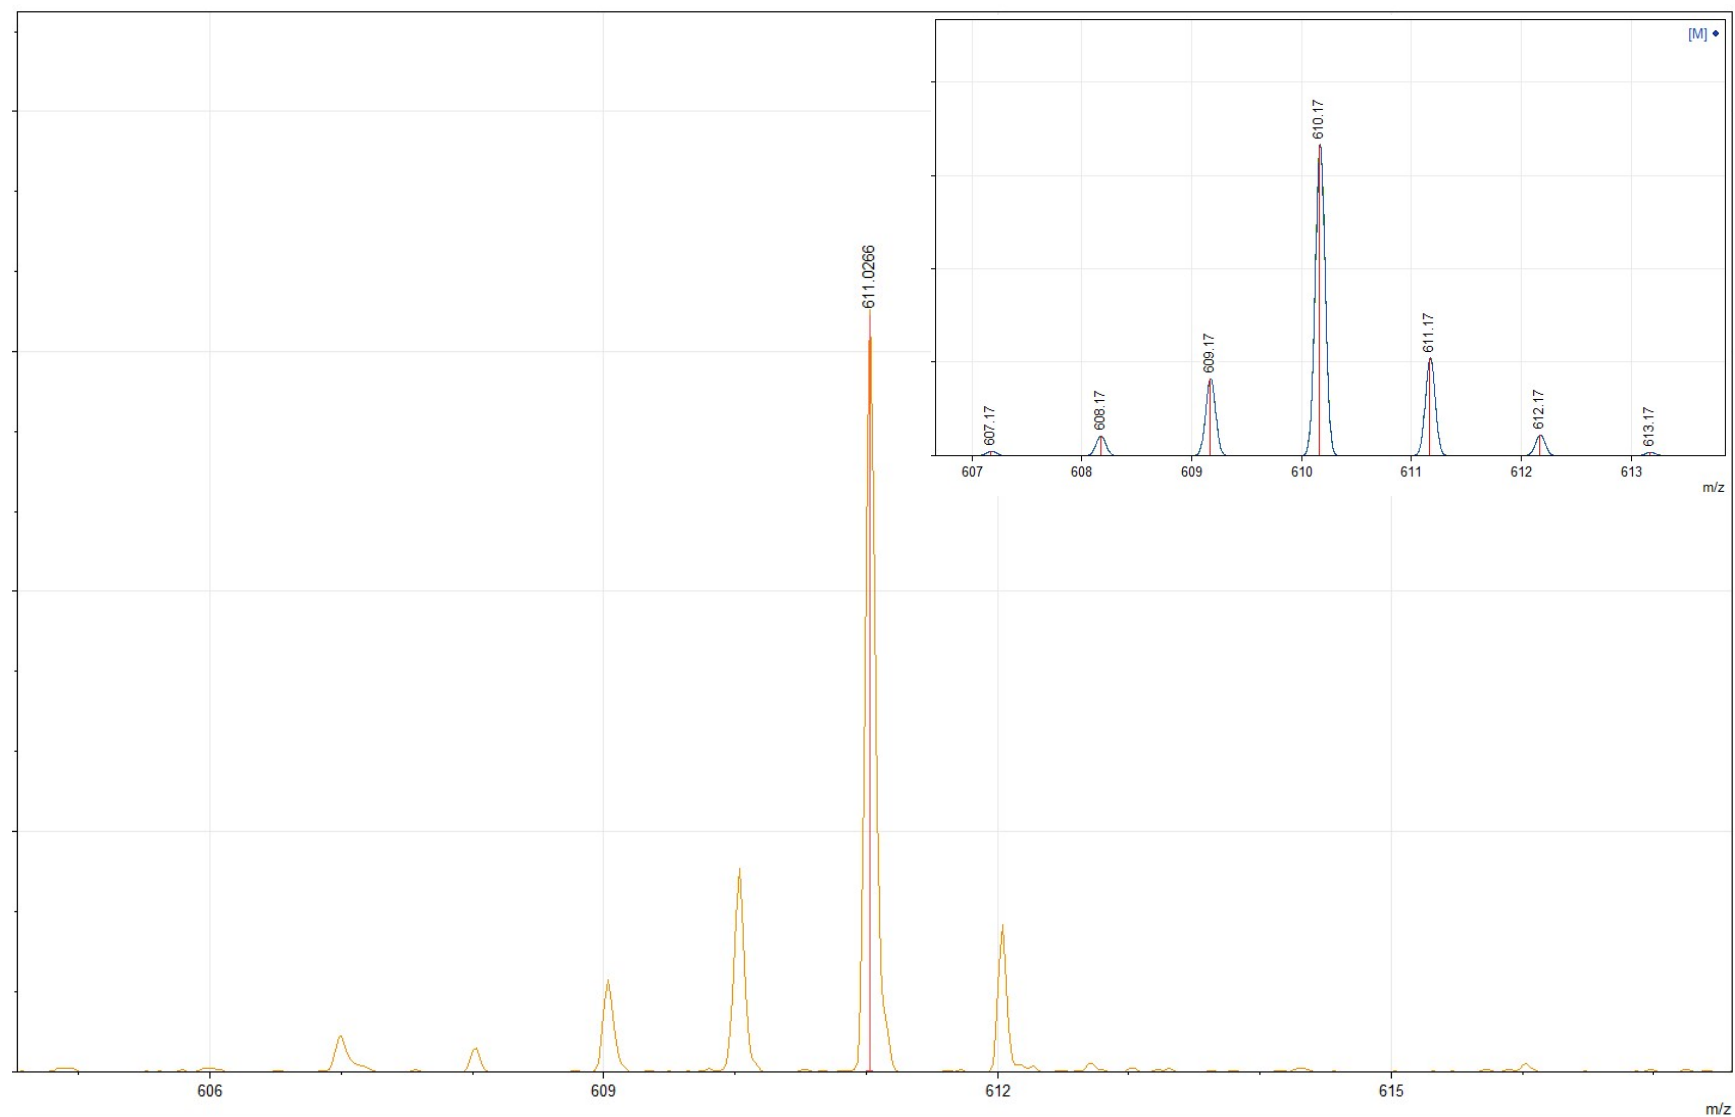

Figure S2. Fragment of the MALDI-TOF mass spectrum of the semiclathrochelate  $\text{FeN}_x(\text{HN}_x)_2(\text{B4-C}_6\text{H}_4\text{COOH})$  in its positive range. Insert: the theoretically calculated isotopic distribution in its molecular ion.



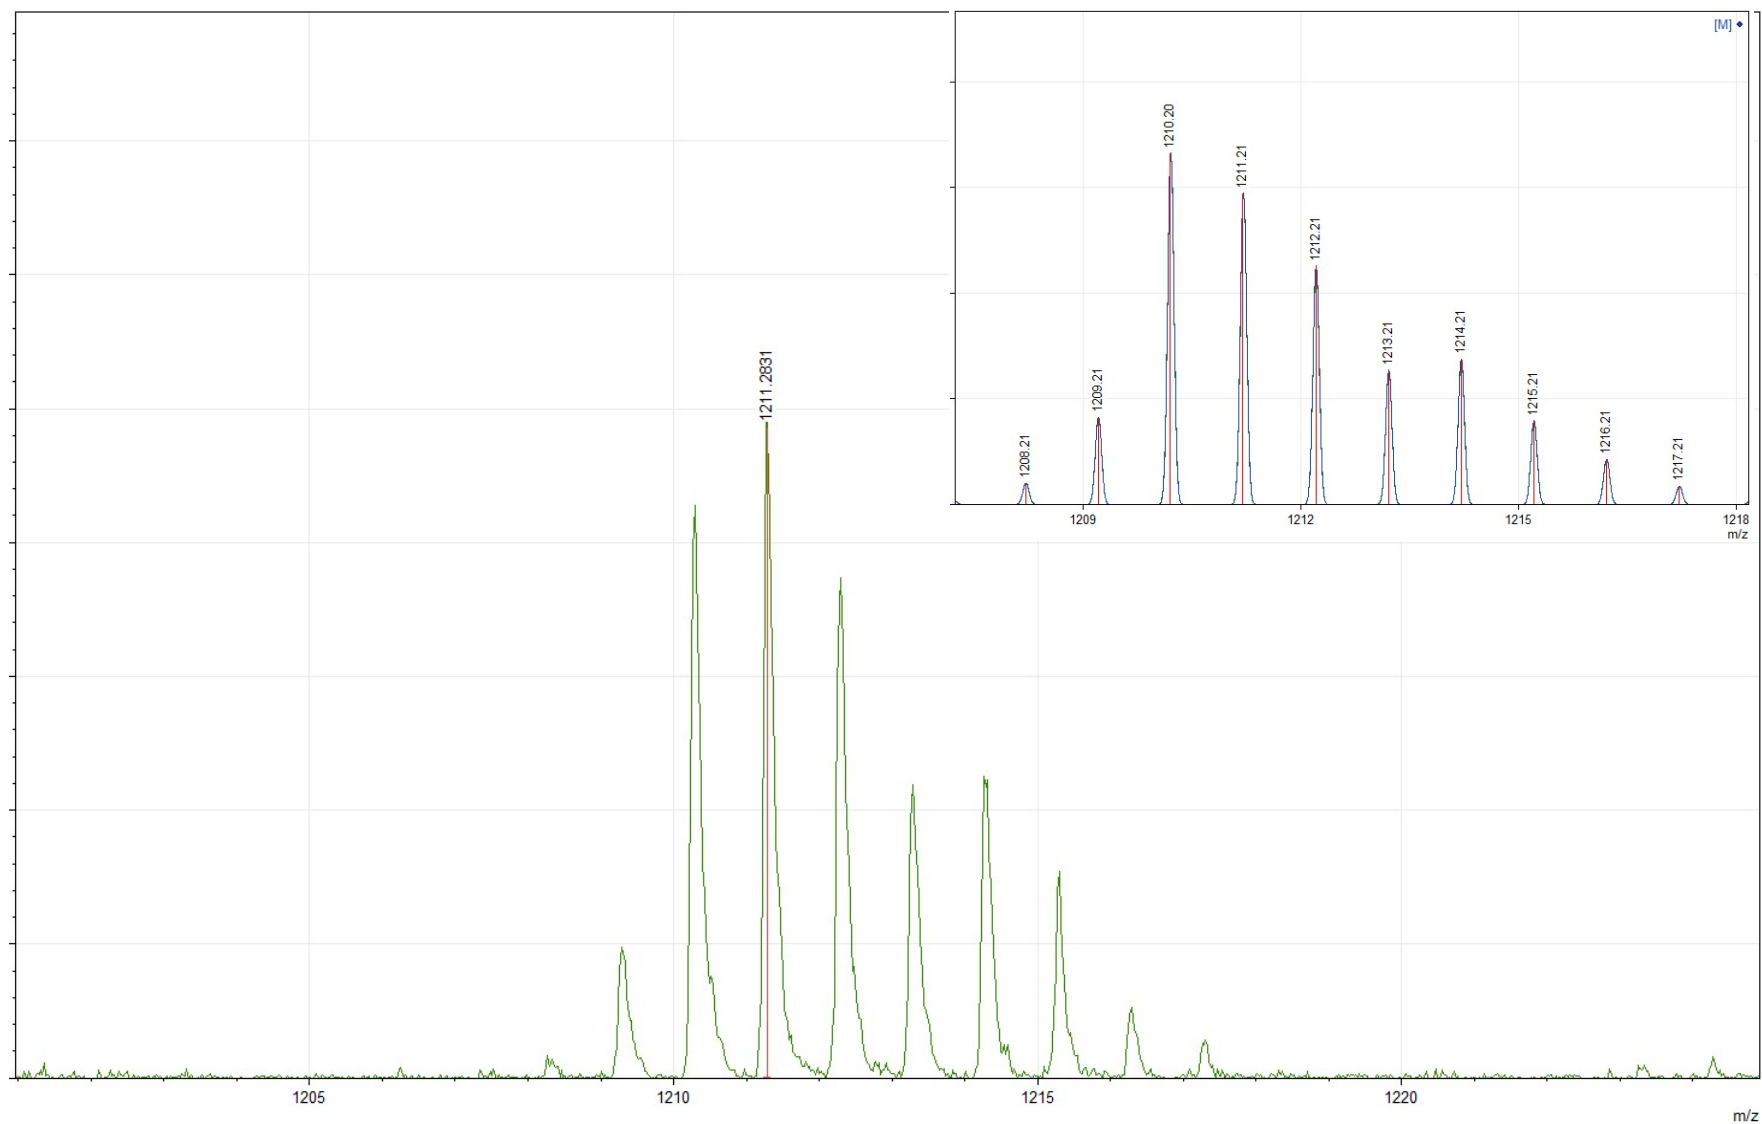

Figure S3. Fragment of the MALDI-TOF mass spectrum of the hybrid complex  $\text{FeN}_x\text{}_3(\text{B4-C}_6\text{H}_4\text{COOH})(\text{ZrPc})$  in its positive range. Insert: the theoretically calculated isotopic distribution in its molecular ion.

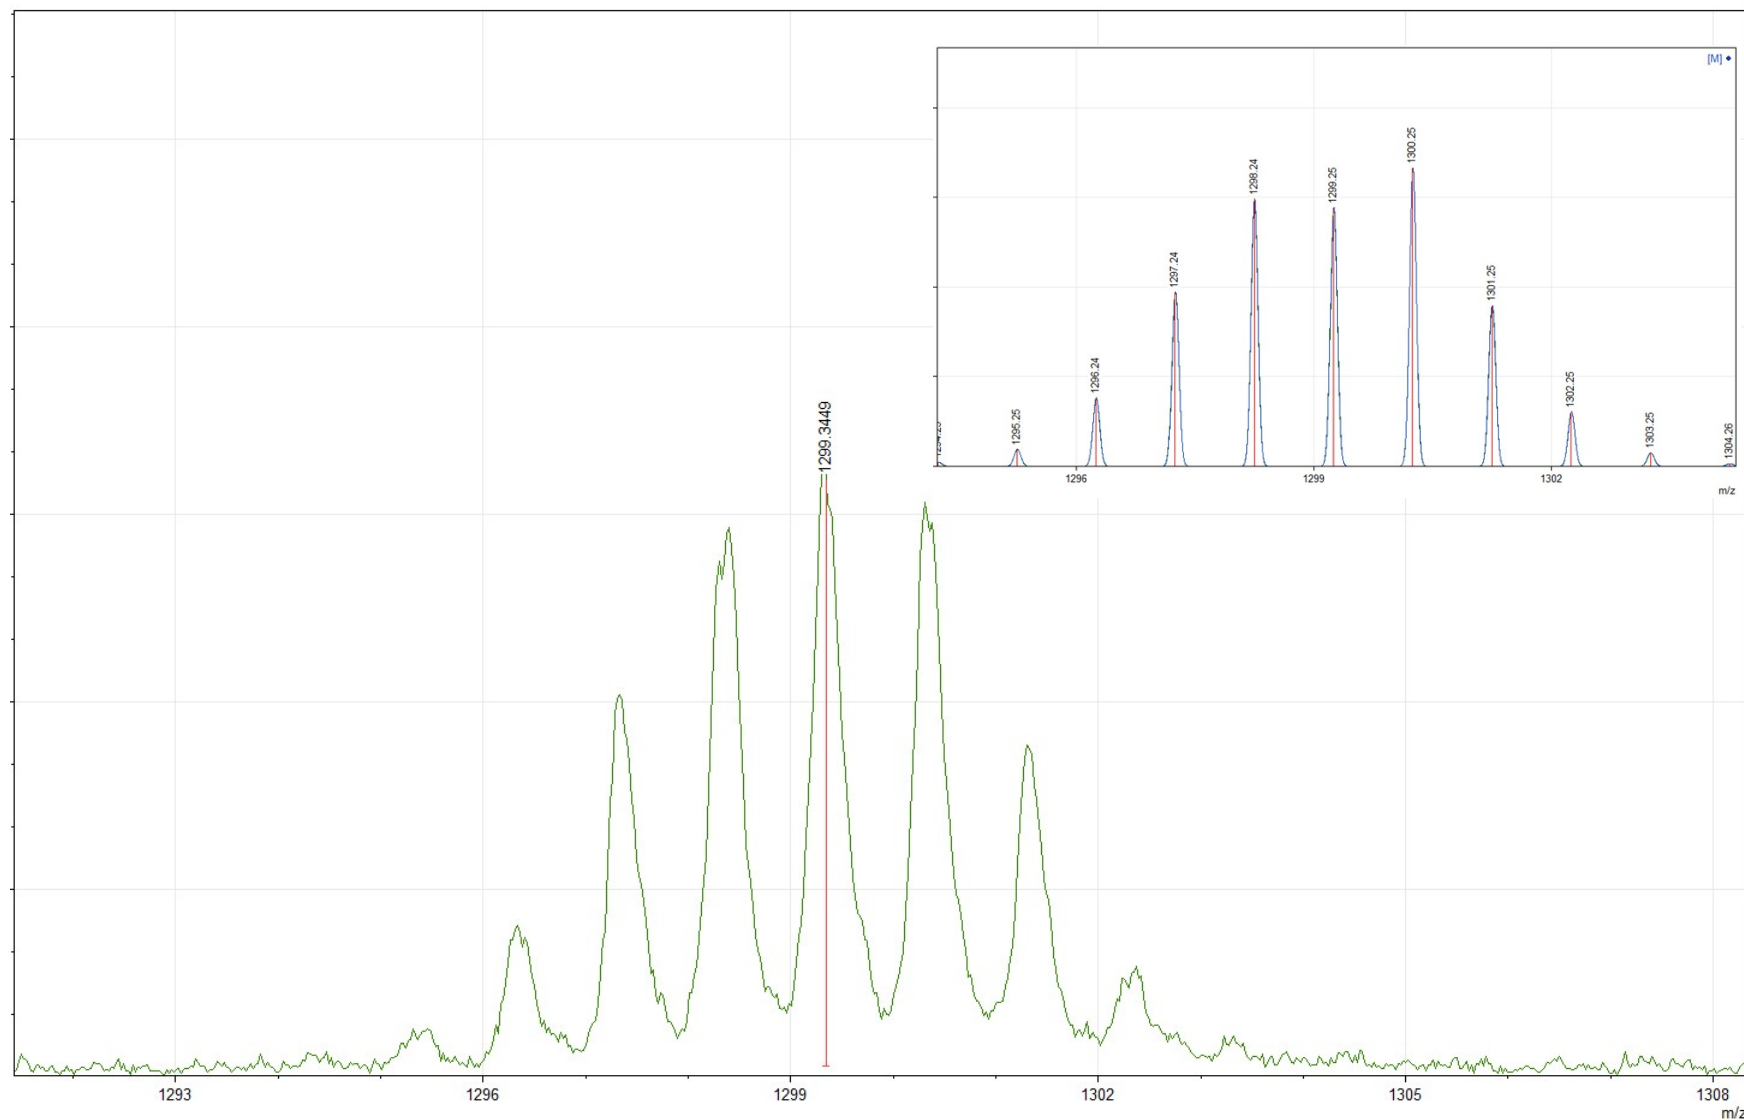

Figure S4. Fragment of the MALDI-TOF mass spectrum of the hybrid complex  $\text{FeN}_x\text{}_3(\text{B4-C}_6\text{H}_4\text{COOH})(\text{HfPc})$  in its positive range. Insert: the theoretically calculated isotopic distribution in its molecular ion.

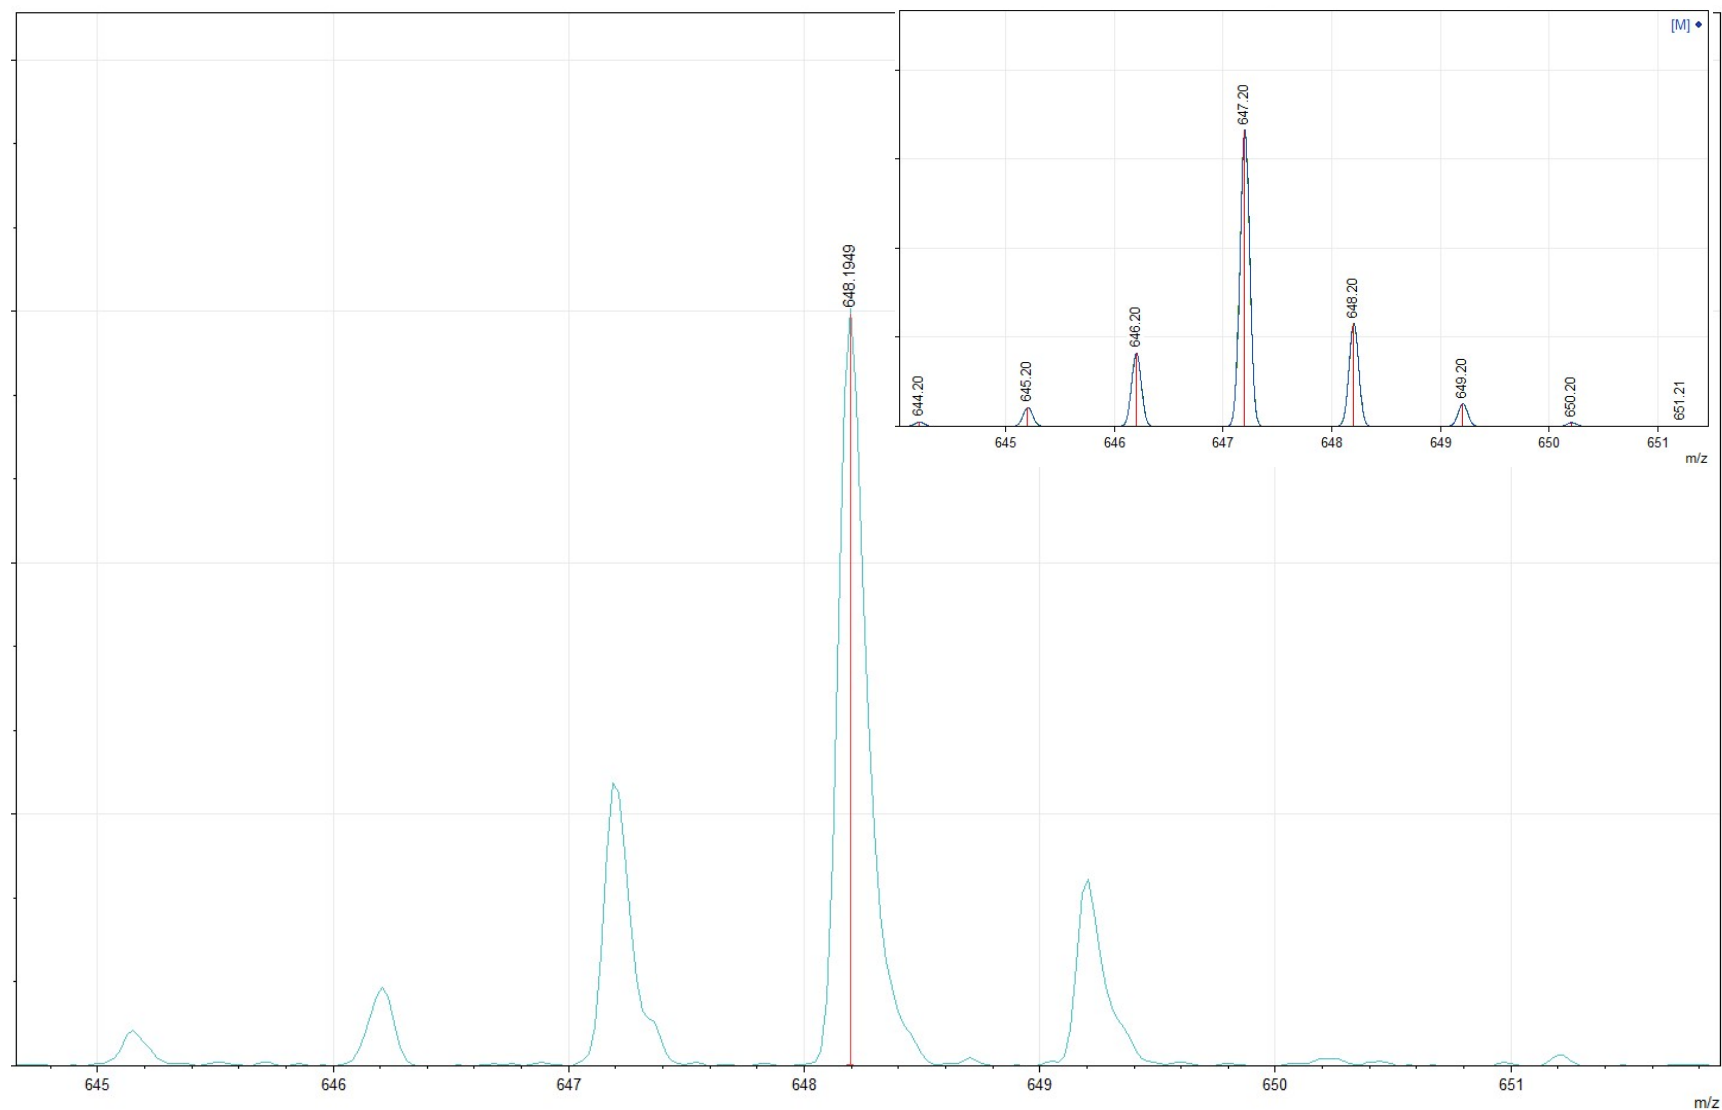

Figure S5. Fragment of the MALDI-TOF mass spectrum of the semiclathrochelate  $\text{FeN}_x(\text{HN}_x)_2(\text{B4-C}_6\text{H}_4\text{COProp})$  in its positive range. Insert: the theoretically calculated isotopic distribution in its molecular ion.

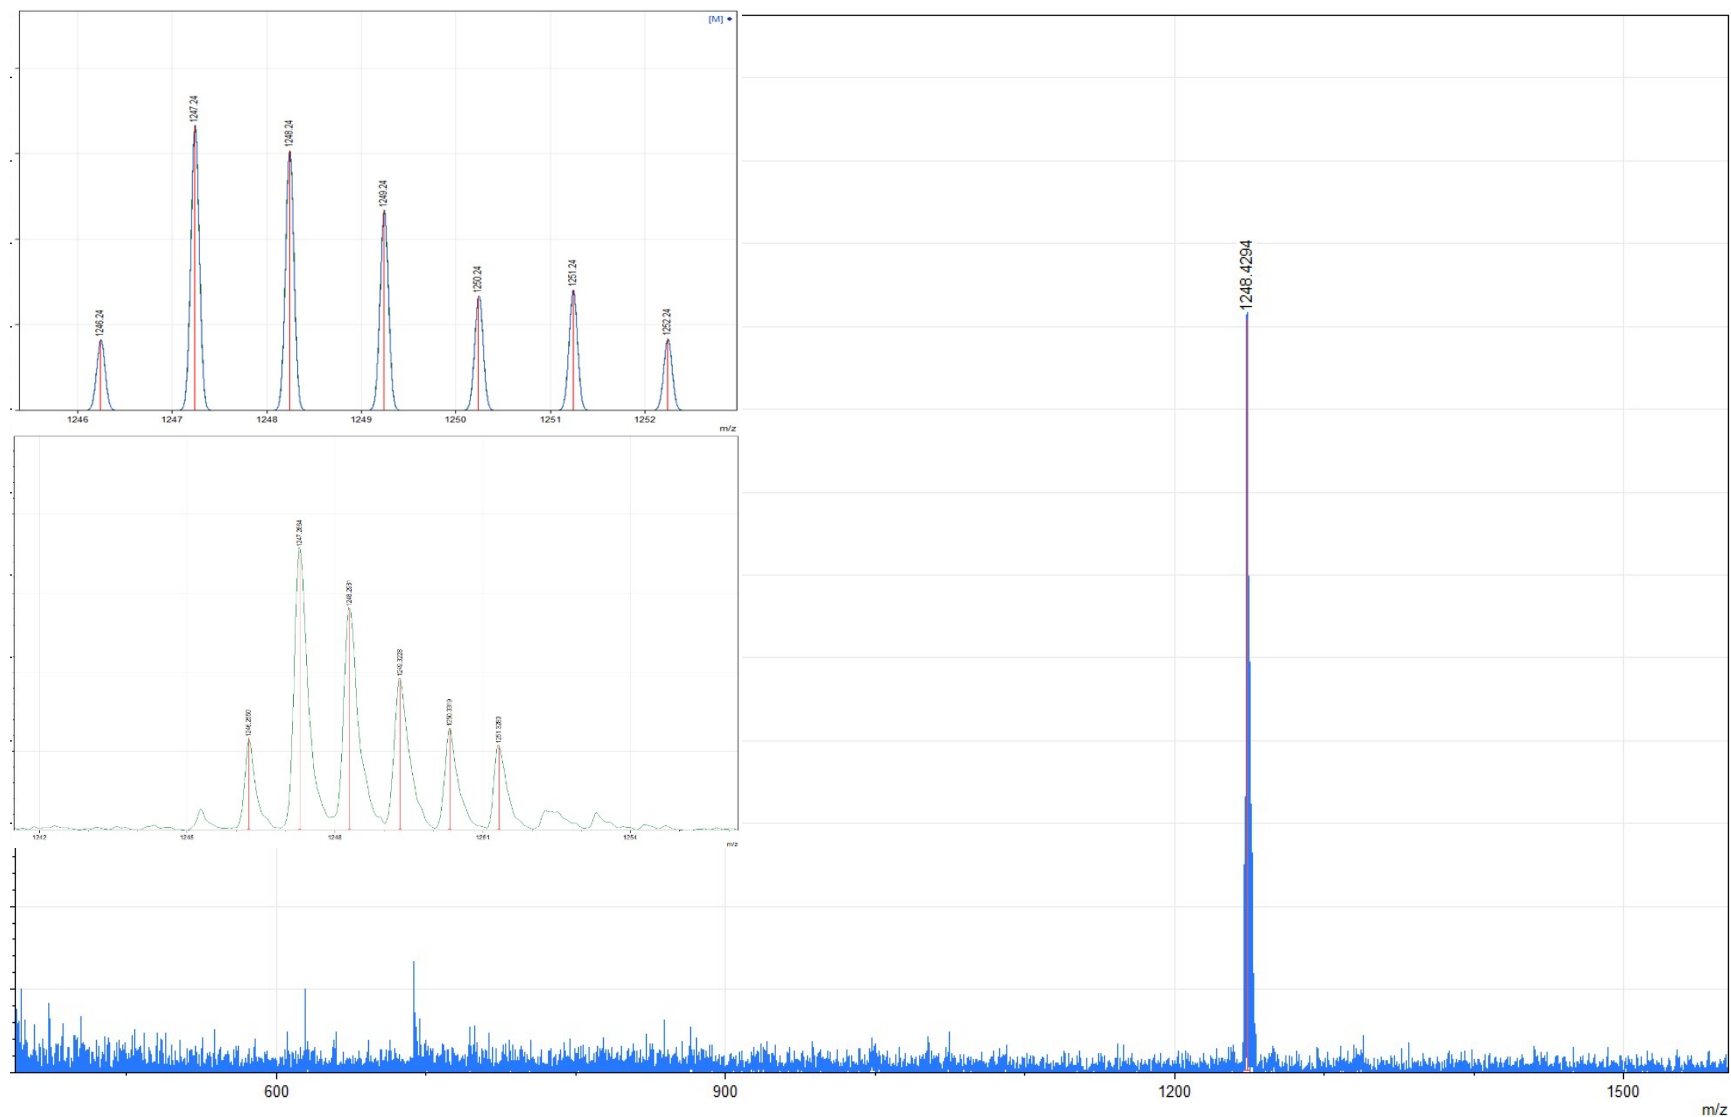

Figure S6. Fragment of the MALDI-TOF mass spectrum of the hybrid complex  $\text{FeN}_x\text{}_3(\text{B}_4\text{-C}_6\text{H}_4\text{COProp})(\text{ZrPc})$  in its positive range. Insert: the theoretically calculated isotopic distribution in its molecular ion.

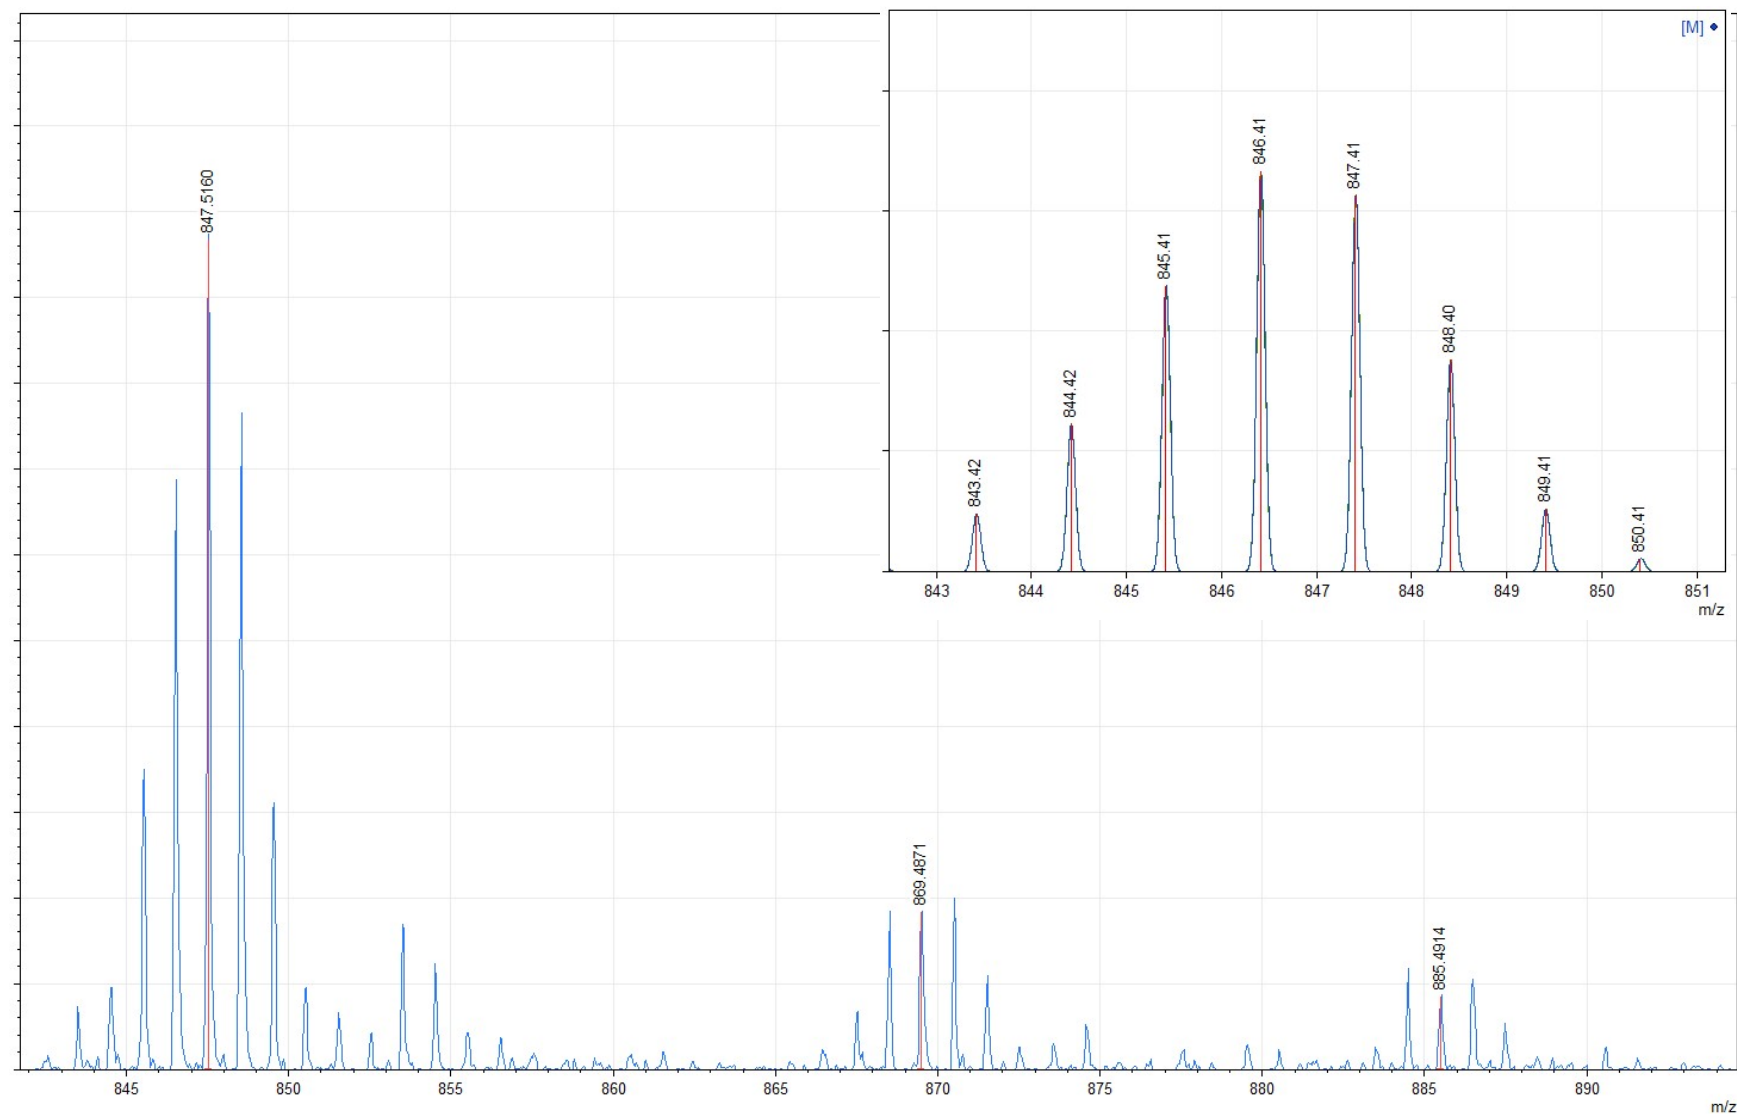

Figure S7. Fragment of the MALDI-TOF mass spectrum of the carboranosemiclathrochelate  $\text{FeN}_x(\text{HN}_x)_2(\text{B}_4\text{-C}_6\text{H}_4\text{COSpCarb})$  in its positive range. Insert: the theoretically calculated isotopic distribution in its molecular ion.

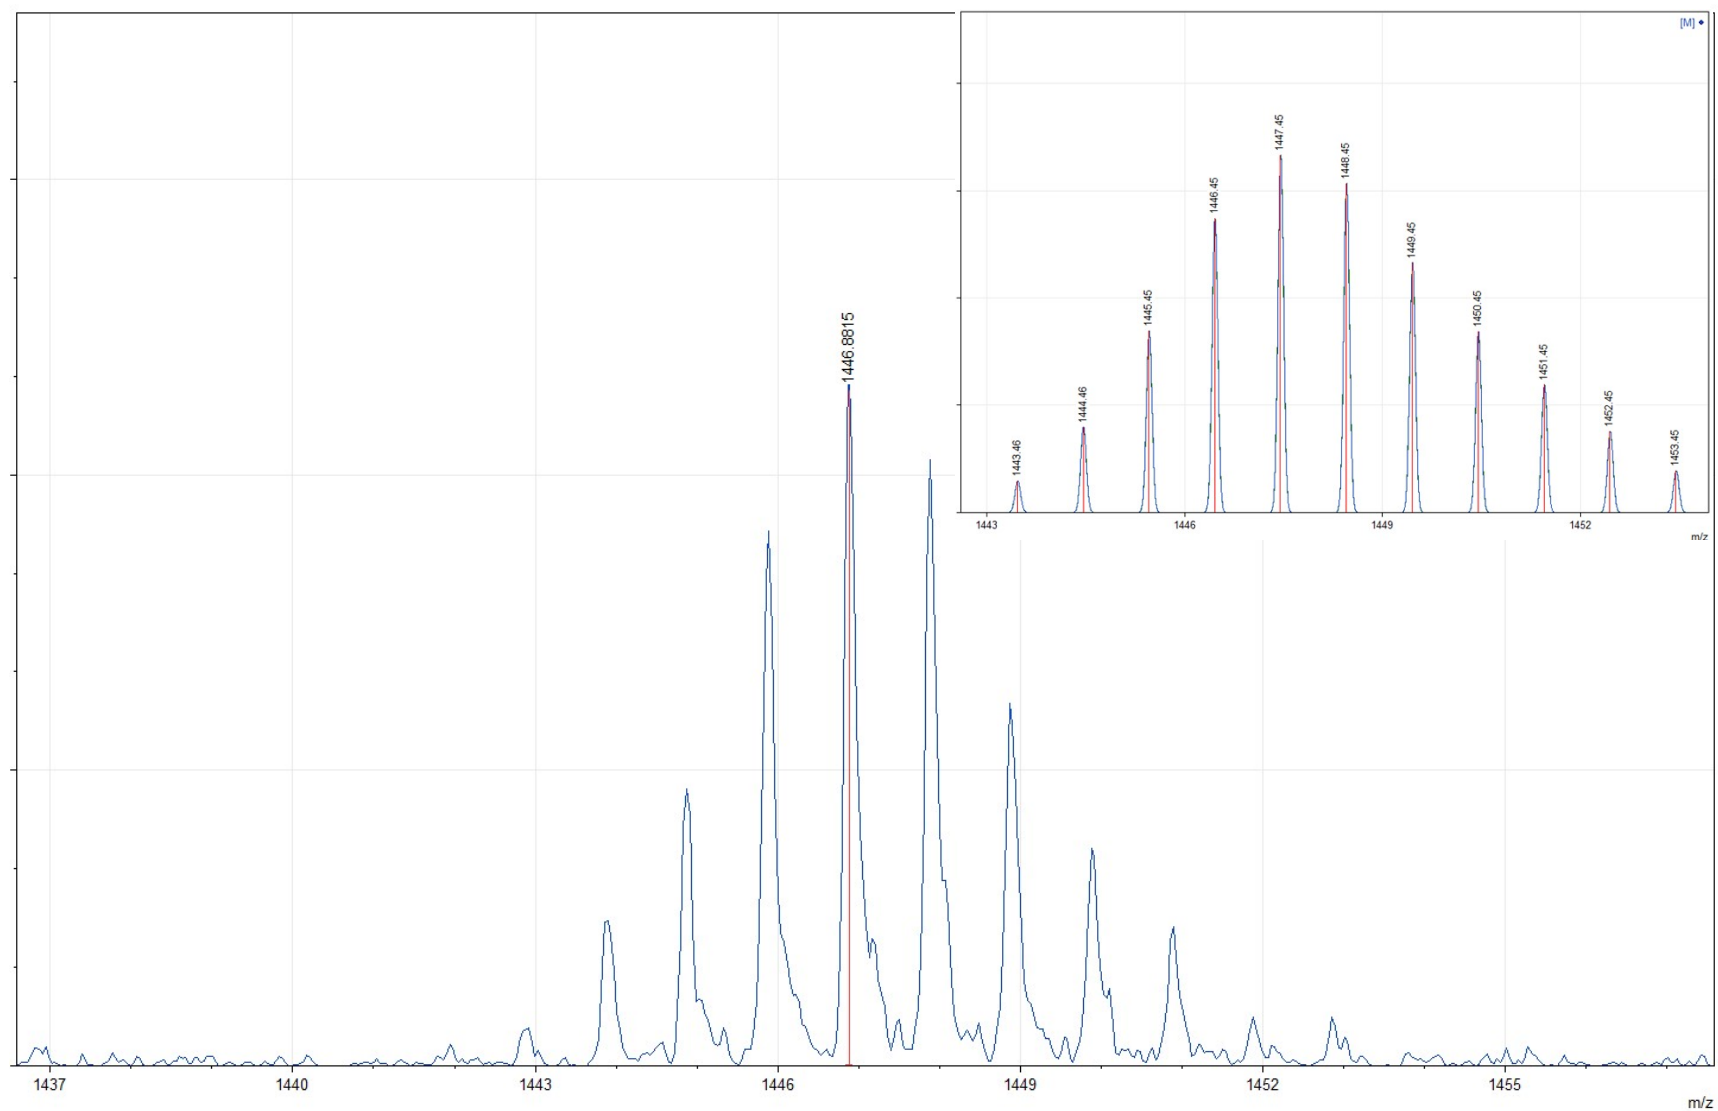

Figure S8. Fragment of the MALDI-TOF mass spectrum of the polytopic complex  $\text{FeN}_x\text{}_3(\text{B4-C}_6\text{H}_4\text{COSpCarb})(\text{ZrPc})$  in its positive range. Insert: the theoretically calculated isotopic distribution in its molecular ion.

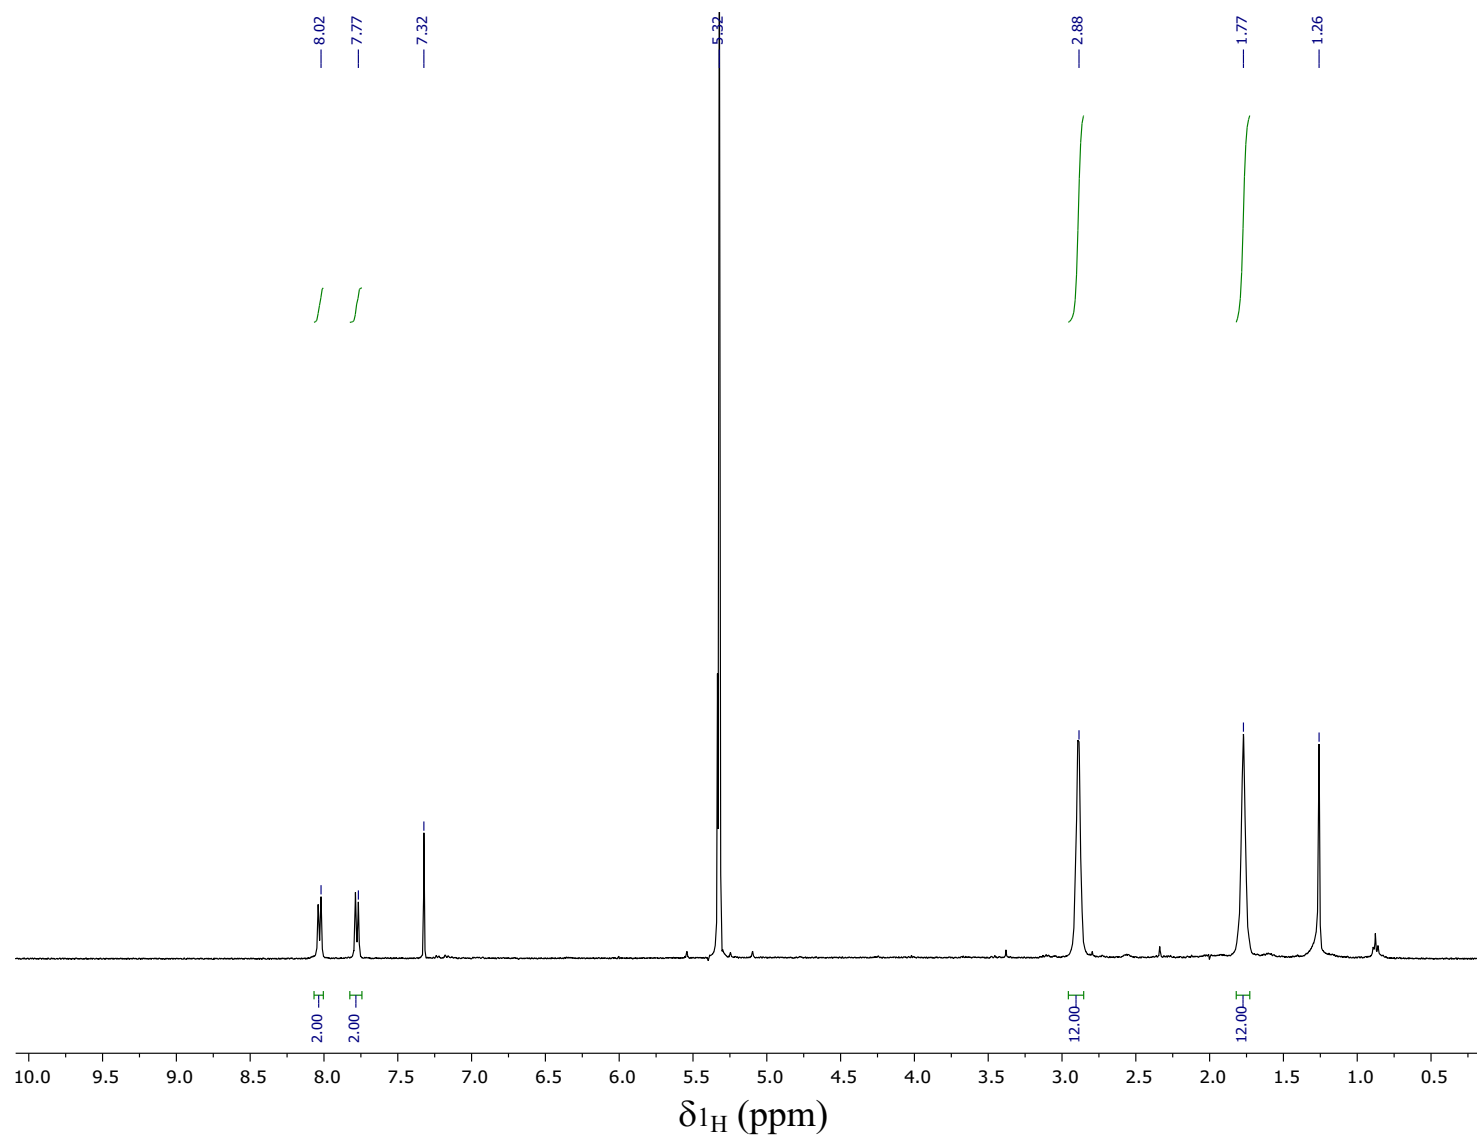

Figure S9. Solution  $^1\text{H}$  NMR spectrum of the semiclatrochelate  $\text{Fe}(\text{HN}_x)_2\text{N}_x(\text{B4-C}_6\text{H}_4\text{COOH})$  in  $\text{CD}_2\text{Cl}_2$ .

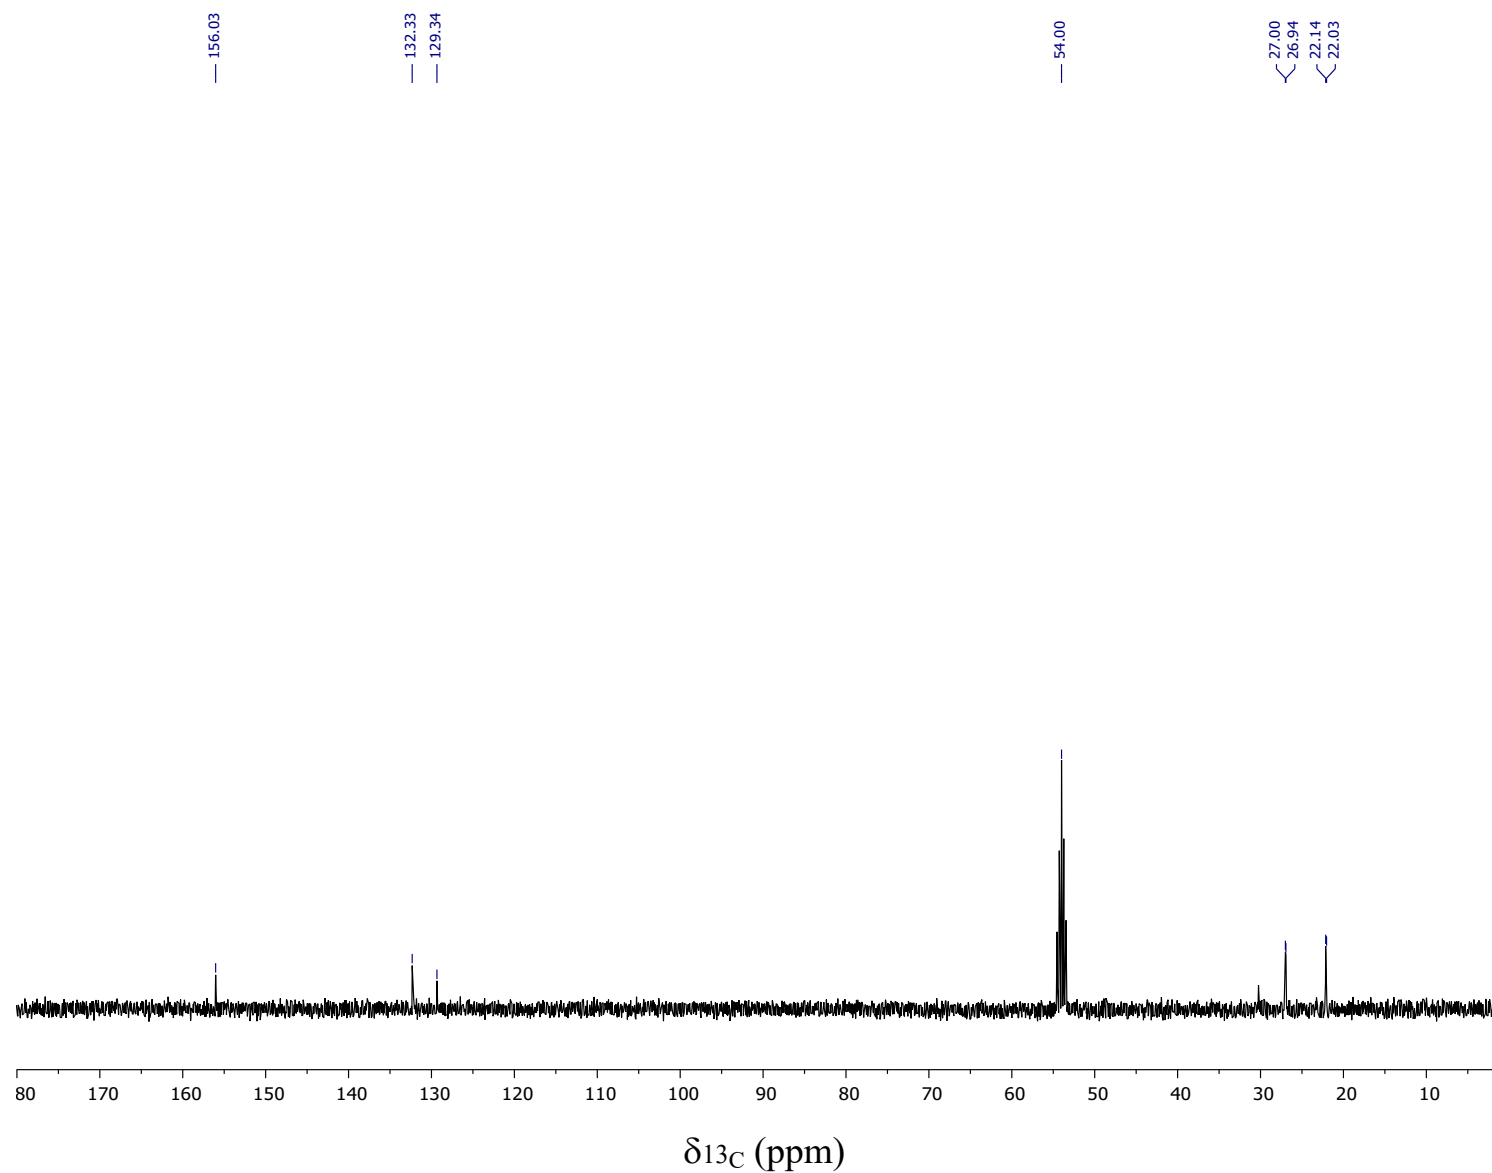

Figure S10.  $^{13}\text{C}\{^1\text{H}\}$  NMR spectrum of the semiclatrochelat  $\text{Fe}(\text{HNx})_2\text{Nx}(\text{B4-C}_6\text{H}_4\text{COOH})$  in  $\text{CD}_2\text{Cl}_2$ .



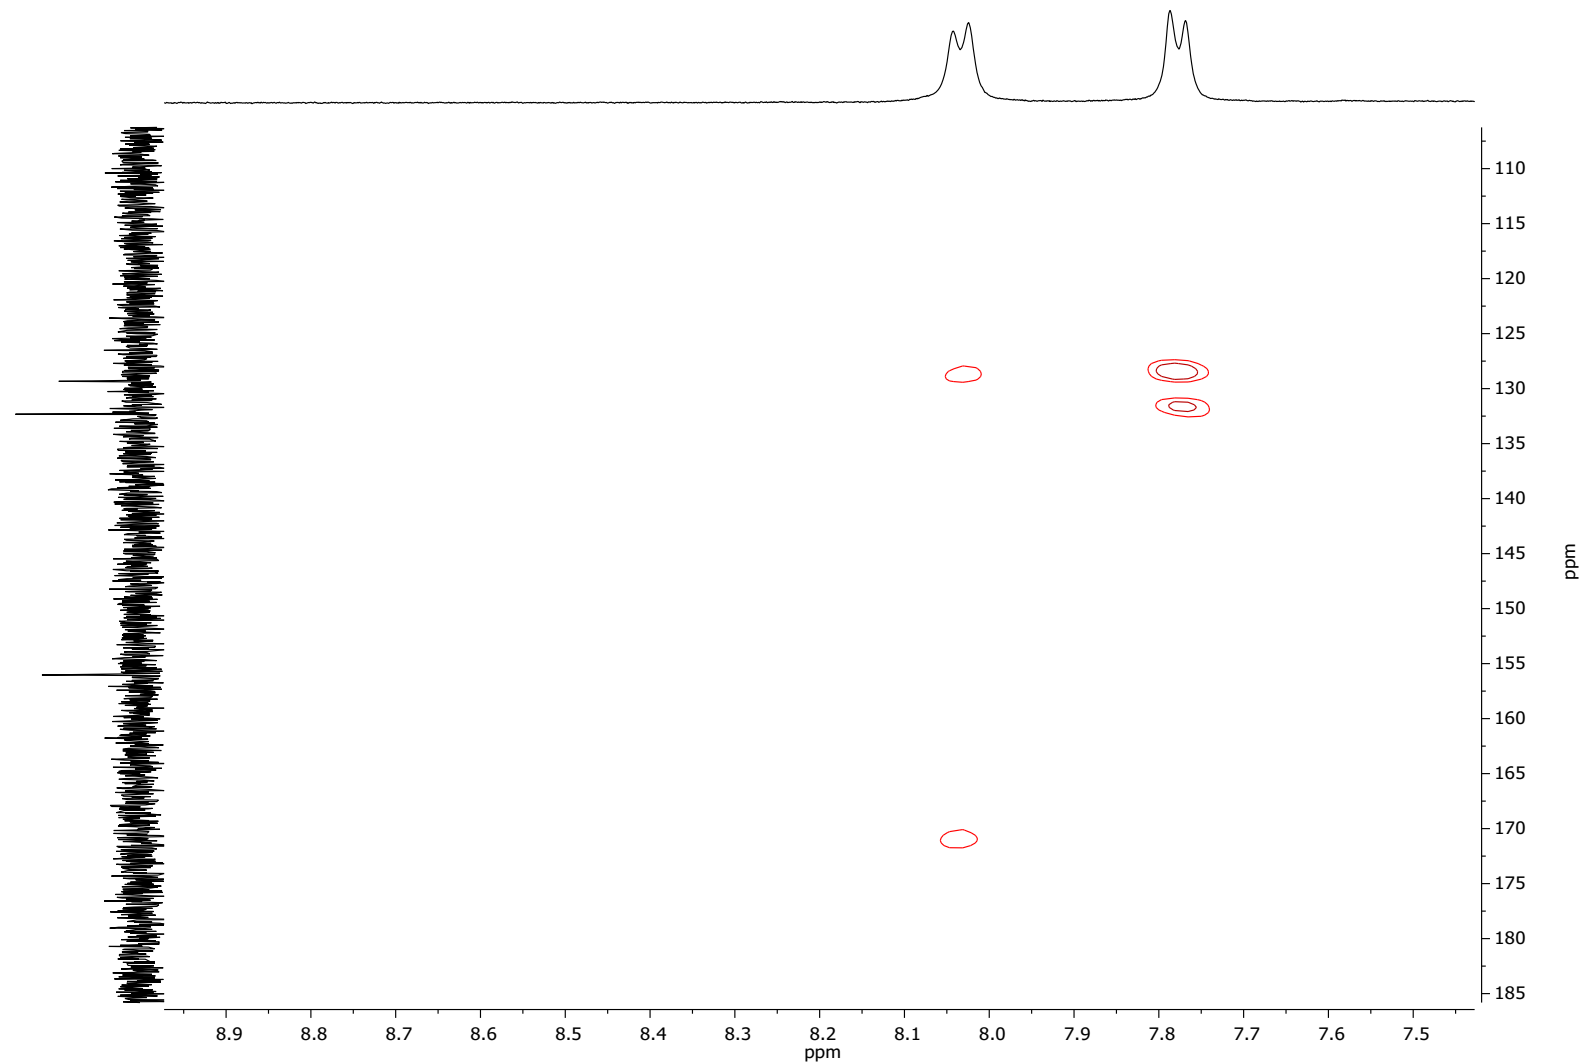

Figure S11. Fragment of 2D HMBC NMR spectrum of the semiclatrocholate  $\text{Fe}(\text{HNx})_2\text{Nx}(\text{B4-C}_6\text{H}_4\text{COOH})$  in  $\text{CD}_2\text{Cl}_2$ .

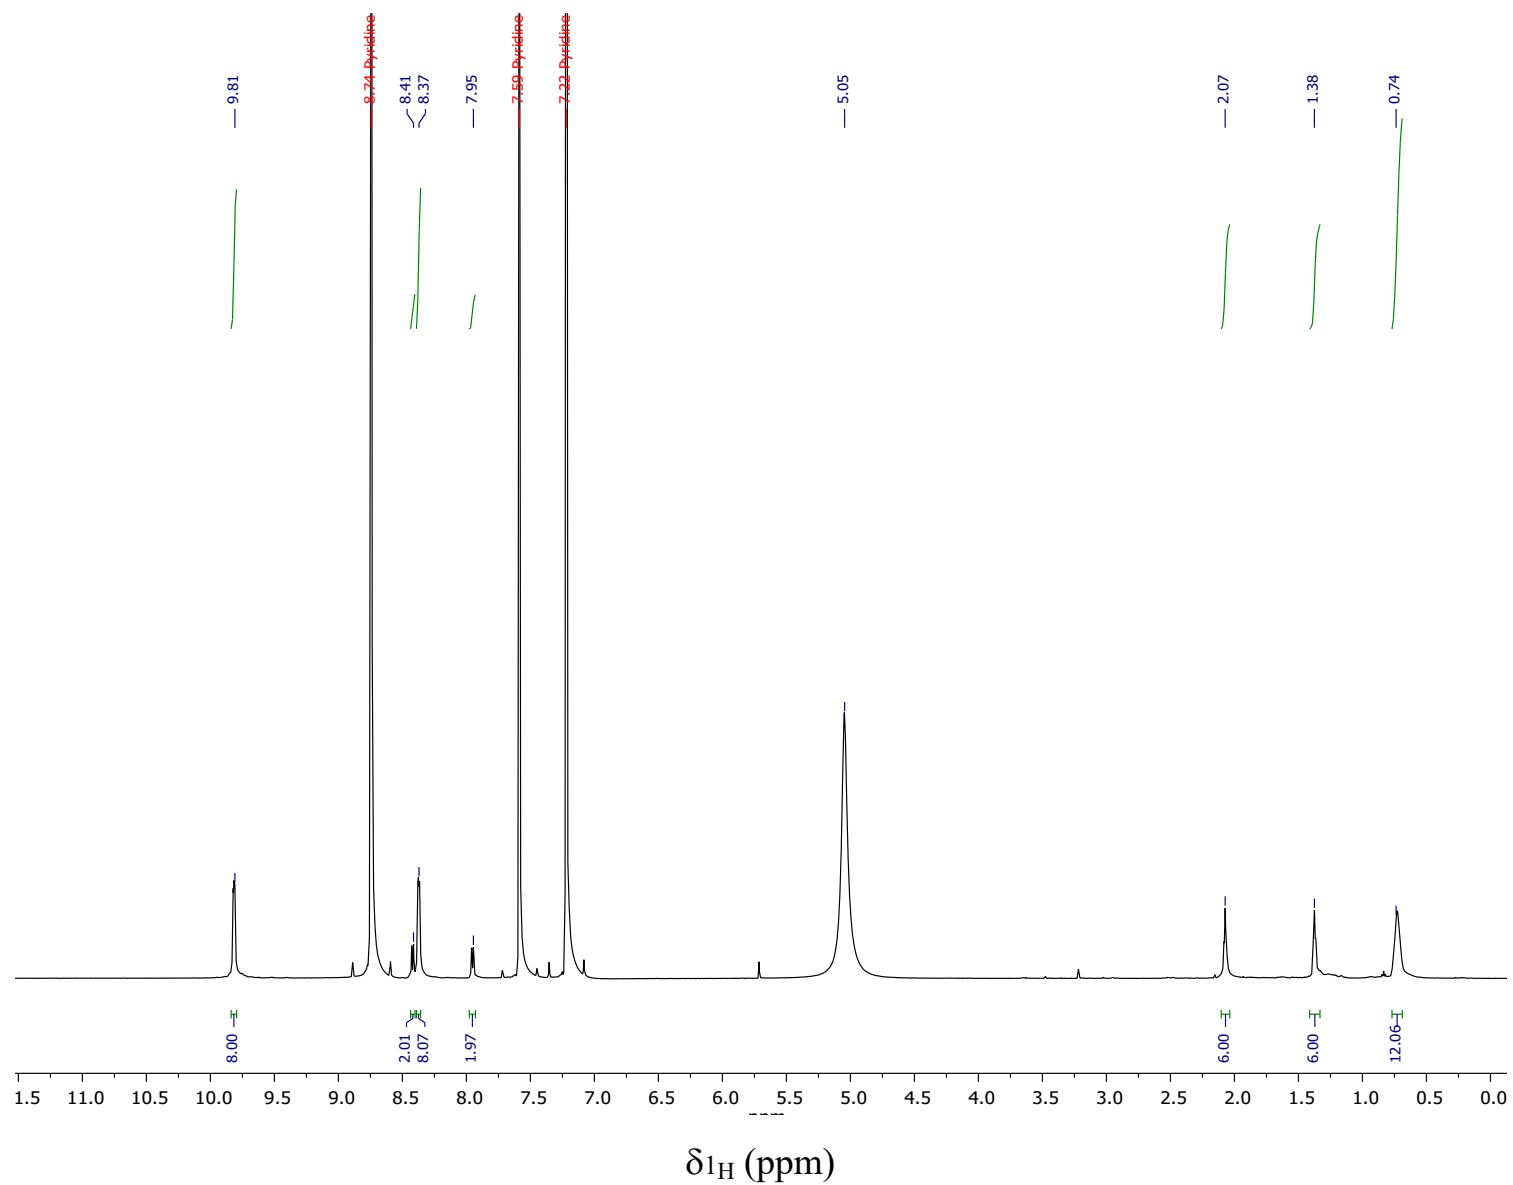

Figure S12. Solution  $^1\text{H}$  NMR spectrum of the hybrid complex  $\text{FeN}_x\text{}_3(\text{B4-C}_6\text{H}_4\text{COOH})(\text{HfPc})$  in  $\text{pyridine-}d_5$ .

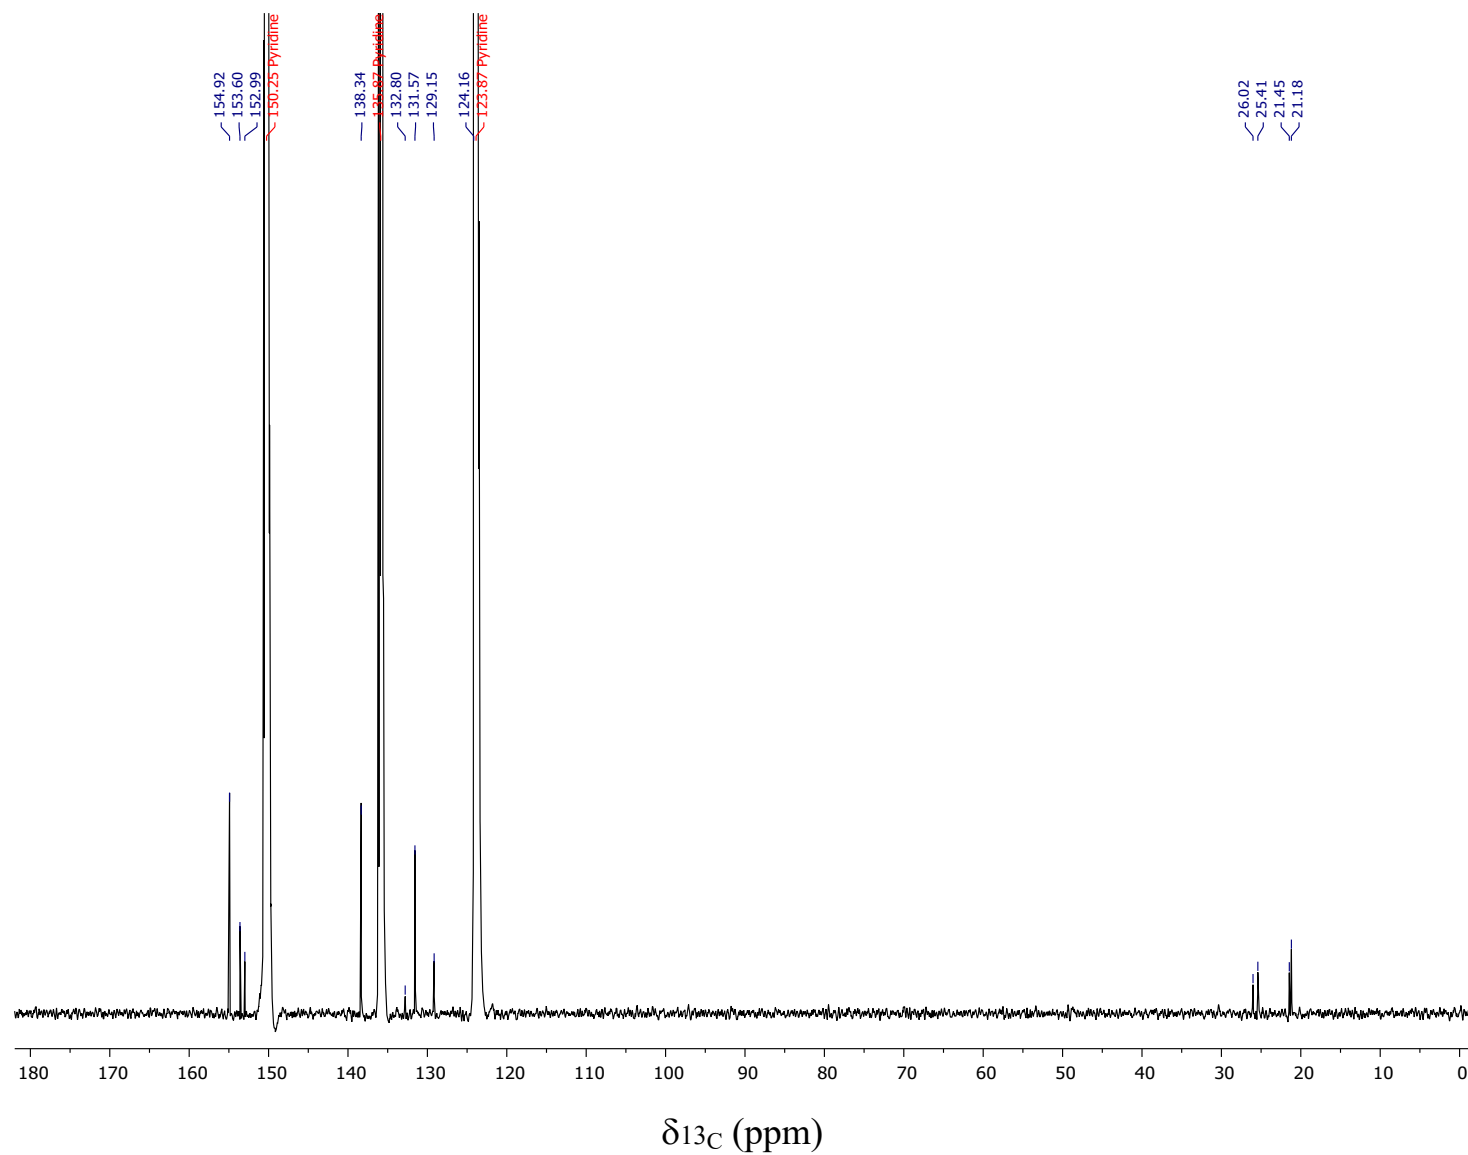

Figure S13. Solution  $^{13}\text{C}\{^1\text{H}\}$  NMR spectrum of the hybrid complex  $\text{FeN}_x\text{}_3(\text{B4-C}_6\text{H}_4\text{COOH})(\text{HfPc})$  in  $\text{pyridine-}d_5$ .

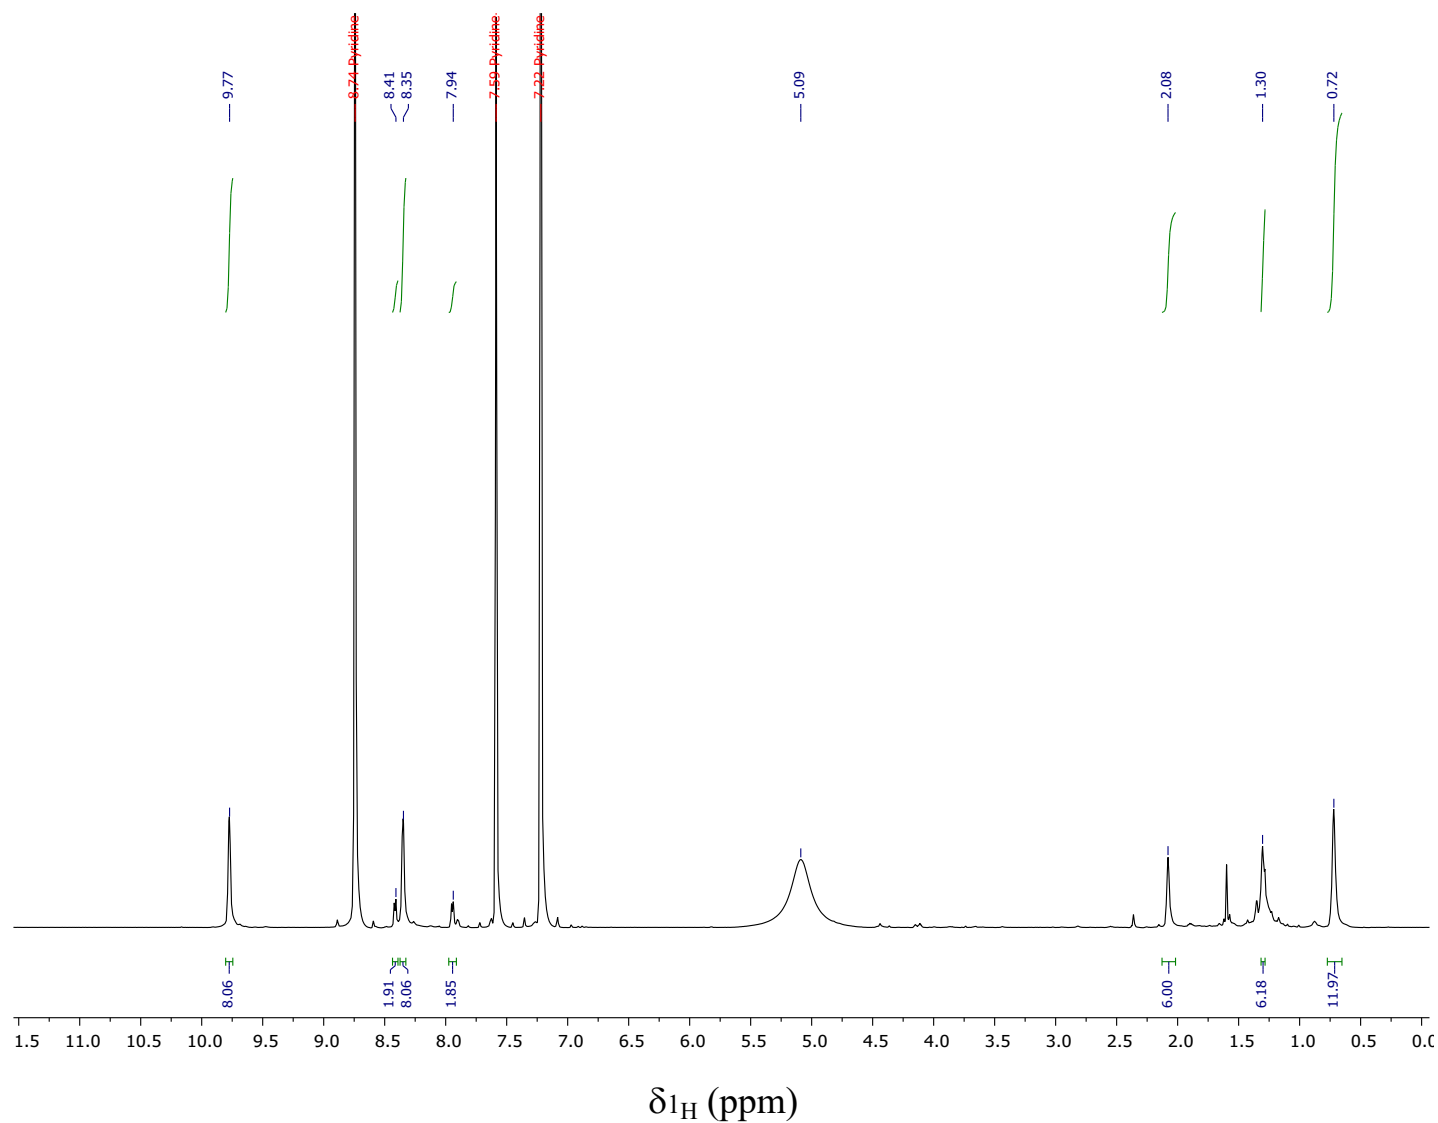

Figure S14. Solution  $^1\text{H}$  NMR spectrum of the hybrid complex  $\text{FeN}_x\text{}_3(\text{B4-C}_6\text{H}_4\text{COOH})(\text{ZrPc})$  in  $\text{pyridine-}d_5$ .

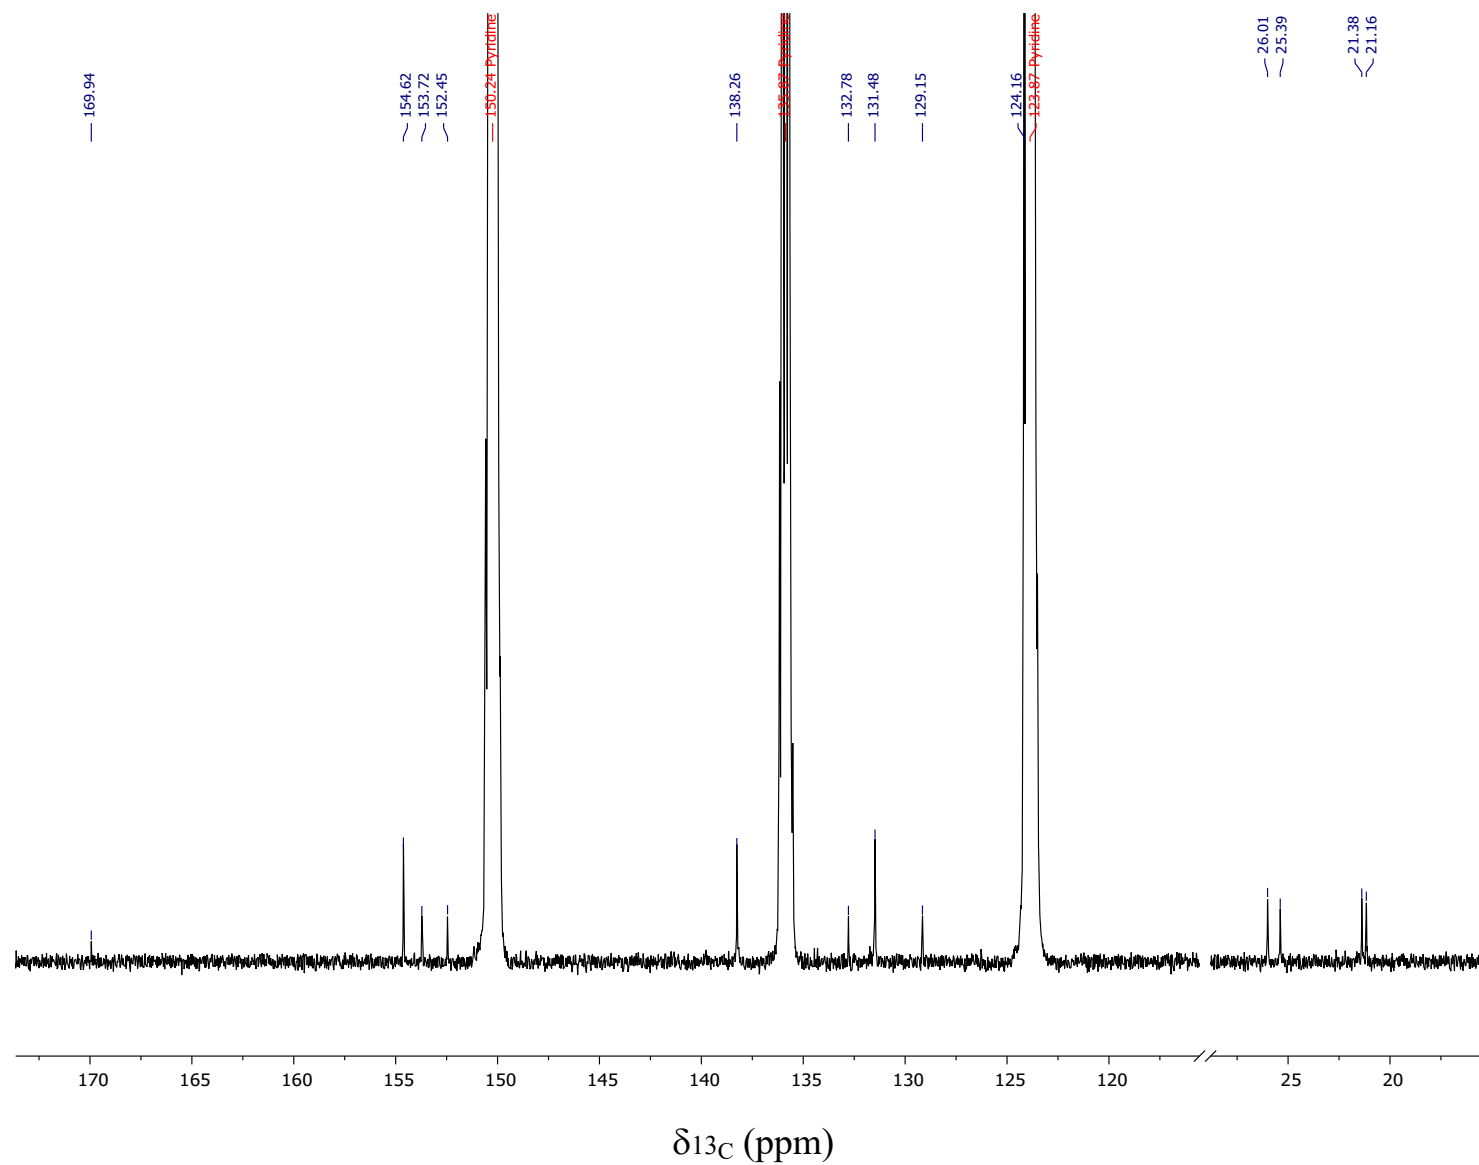

Figure S15.  $^{13}\text{C}\{^1\text{H}\}$  NMR spectrum of the hybrid complex  $\text{FeN}_x\text{}_3(\text{B4-C}_6\text{H}_4\text{COOH})(\text{ZrPc})$  in pyridine- $d_5$ .

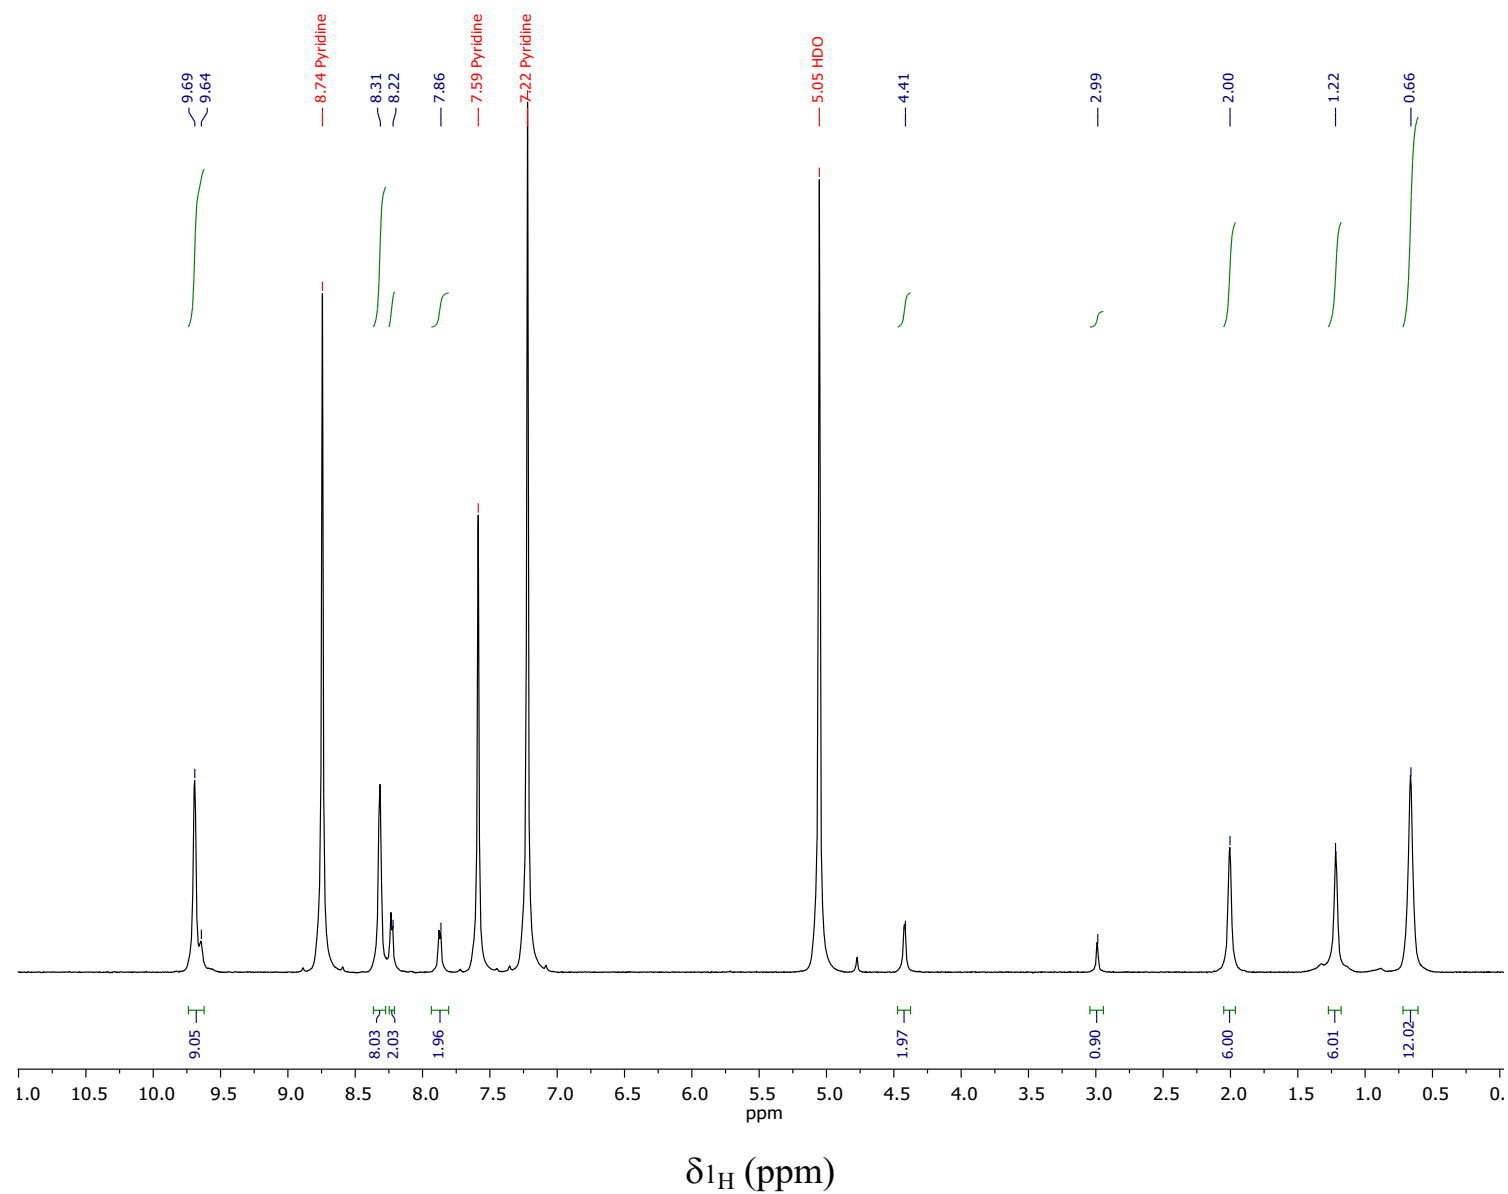

Figure S16. Solution  $^1\text{H}$  NMR spectrum of the hybrid complex  $\text{FeN}_x\text{}_3(\text{B4-C}_6\text{H}_4\text{COProp})(\text{ZrPc})$  in  $\text{pyridine-}d_5$ .

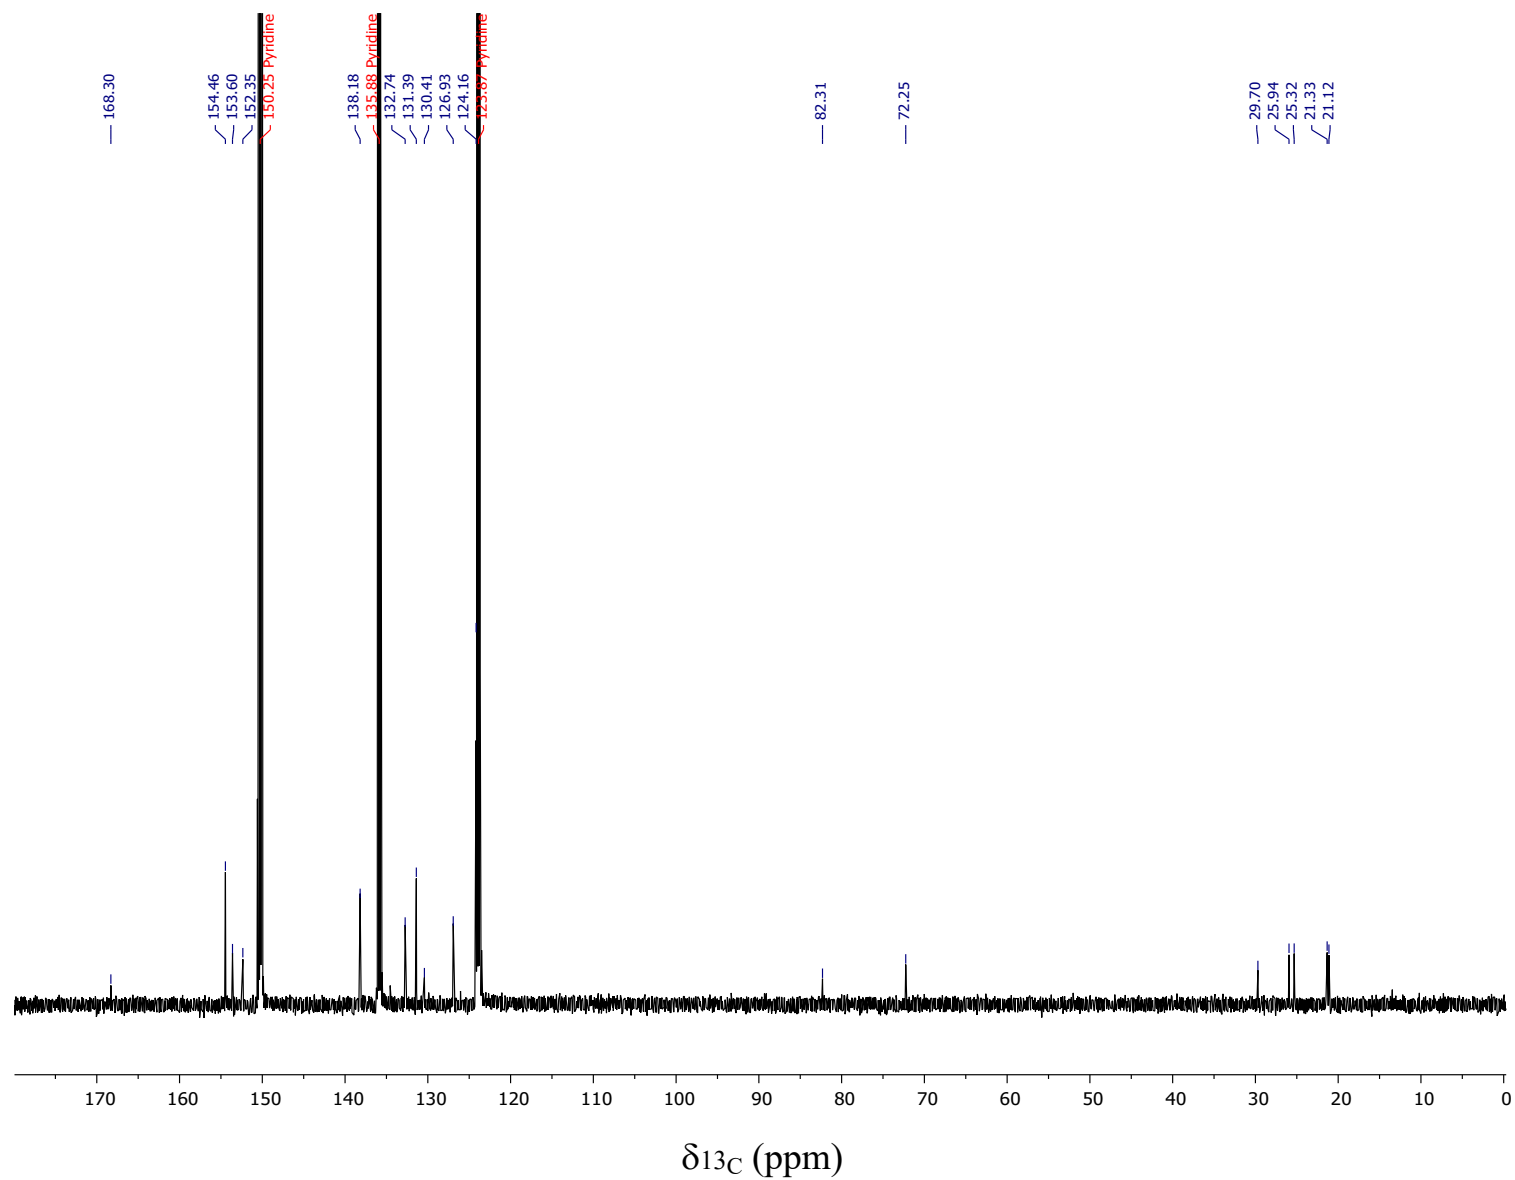

Figure S17. Solution  $^{13}\text{C}\{^1\text{H}\}$  NMR spectrum of the hybrid complex  $\text{FeN}_x\text{}_3(\text{B4-C}_6\text{H}_4\text{COProp})(\text{ZrPc})$  in  $\text{pyridine-}d_5$ .

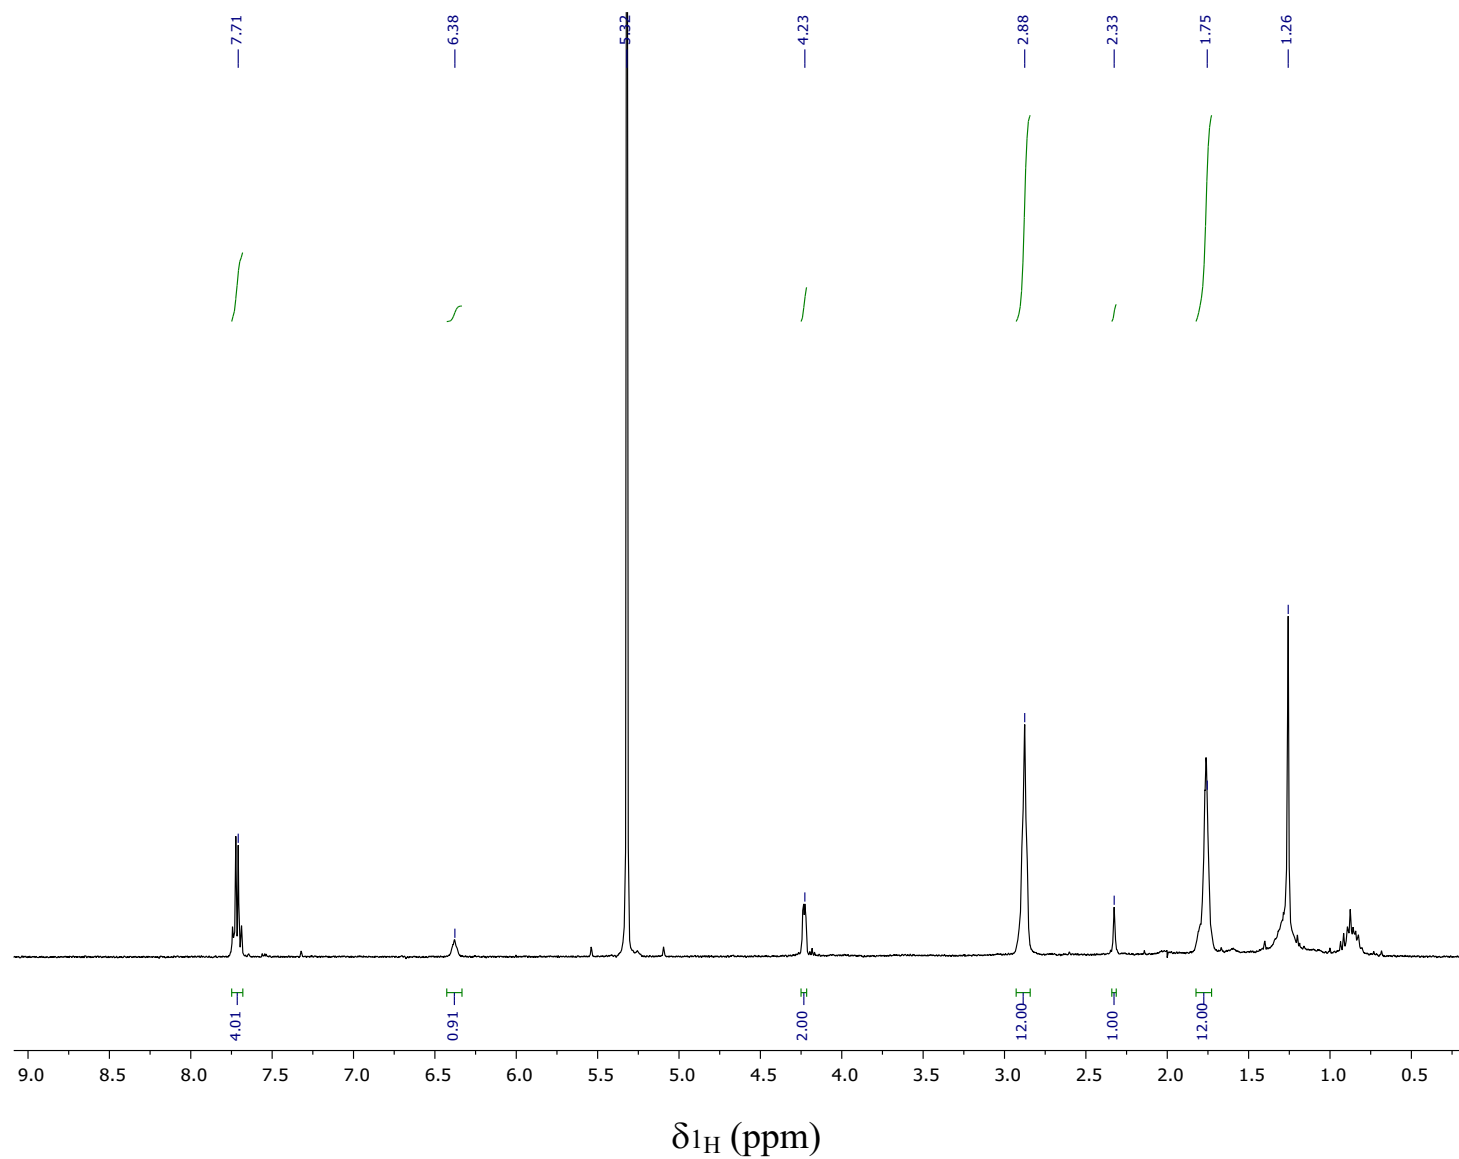

Figure S18. Solution  $^1\text{H}$  NMR spectrum of the semiclatrochelate  $\text{Fe}(\text{HNx})_2\text{Nx}(\text{B4-C}_6\text{H}_4\text{COProp})$  in  $\text{CD}_2\text{Cl}_2$ .



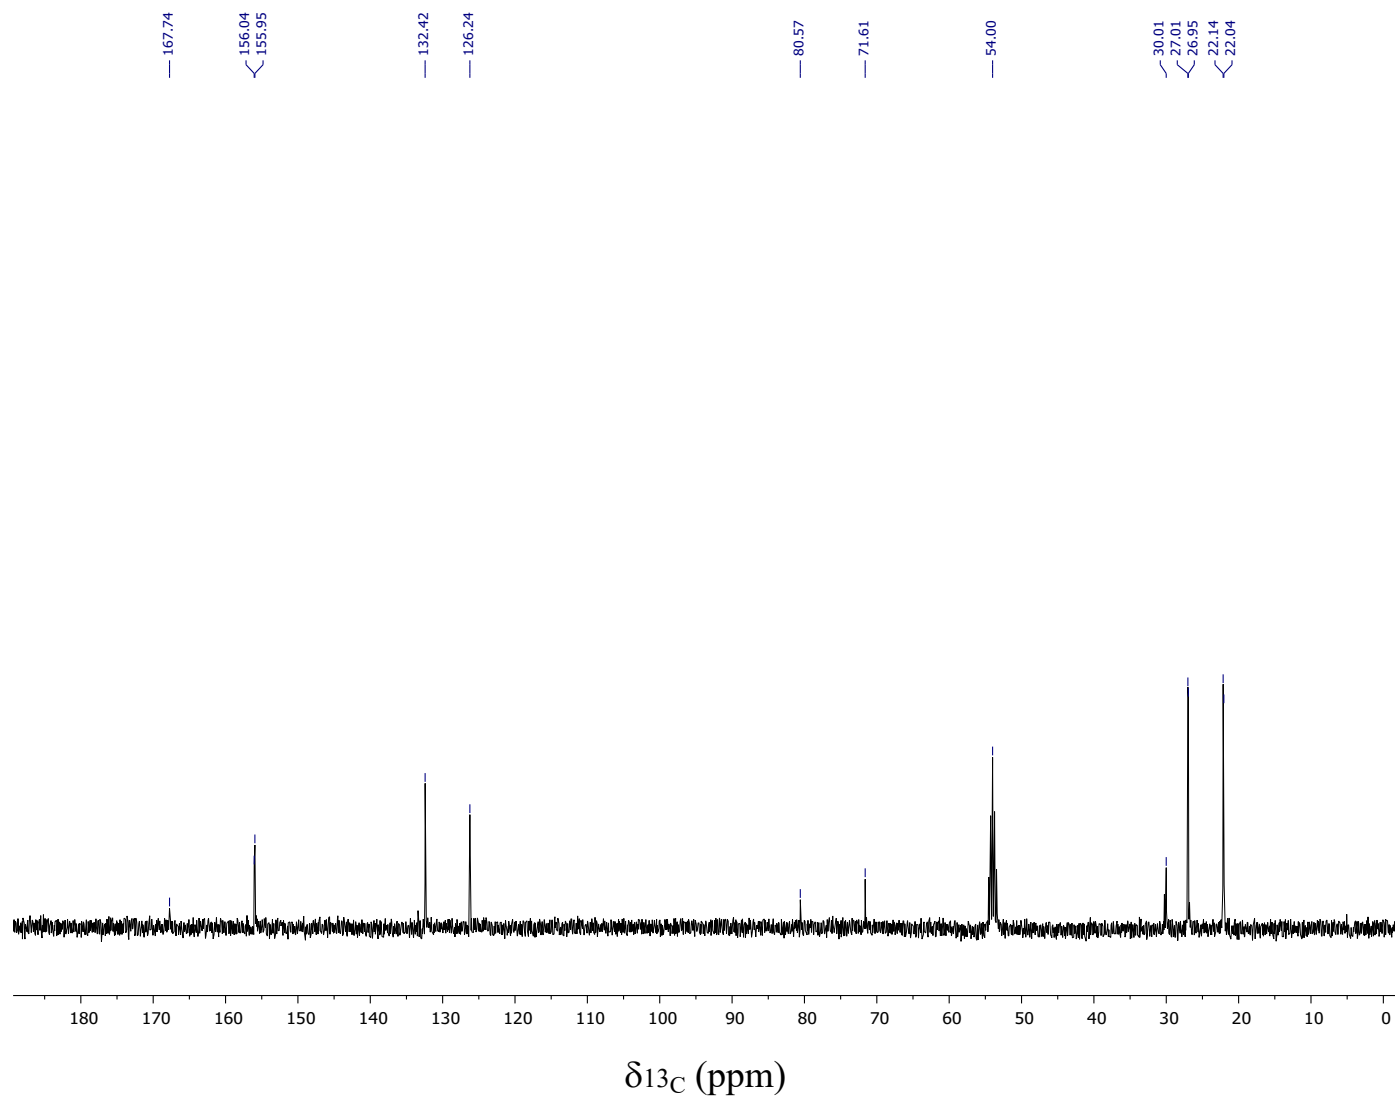

Figure S19. Solution  $^{13}\text{C}$   $^1\text{H}$  NMR spectrum of the semiclatrochelate  $\text{Fe}(\text{HNx})_2\text{Nx}(\text{B4-C}_6\text{H}_4\text{COProp})$  in  $\text{CD}_2\text{Cl}_2$ .

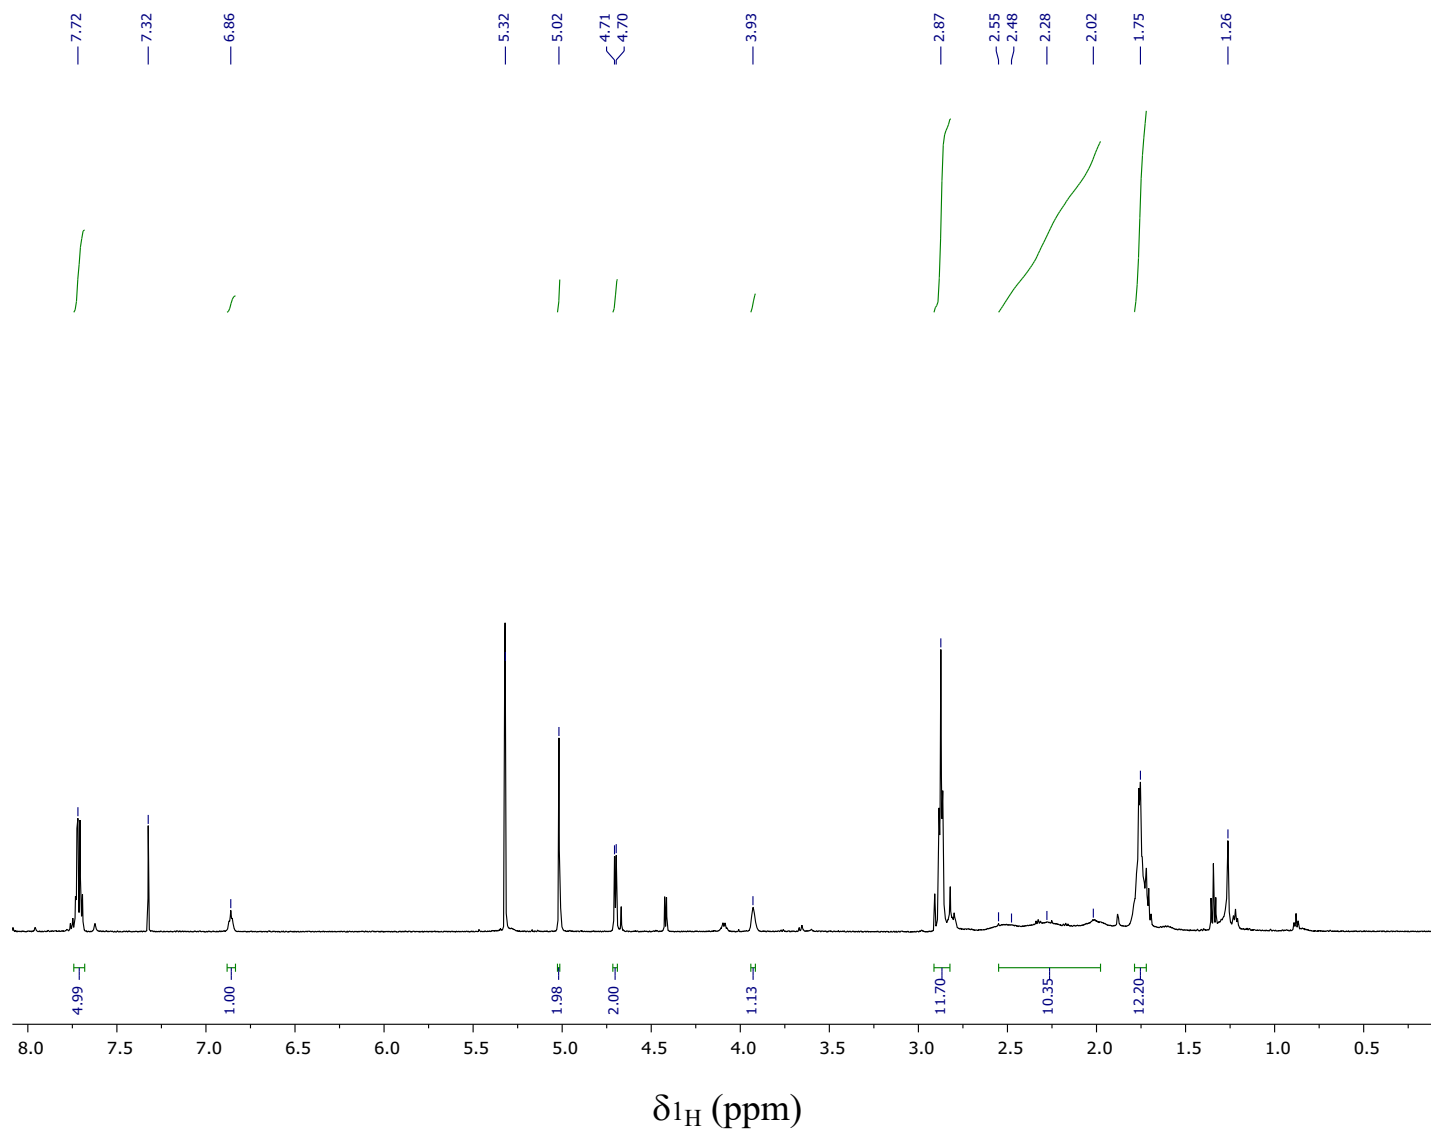

Figure S20. Solution  $^1\text{H}$  NMR spectrum of the carboranosemiclatrochelate  $\text{Fe}(\text{HNx})_2\text{Nx}(\text{B4-C}_6\text{H}_4\text{COspCarb})$  in  $\text{CD}_2\text{Cl}_2$ .

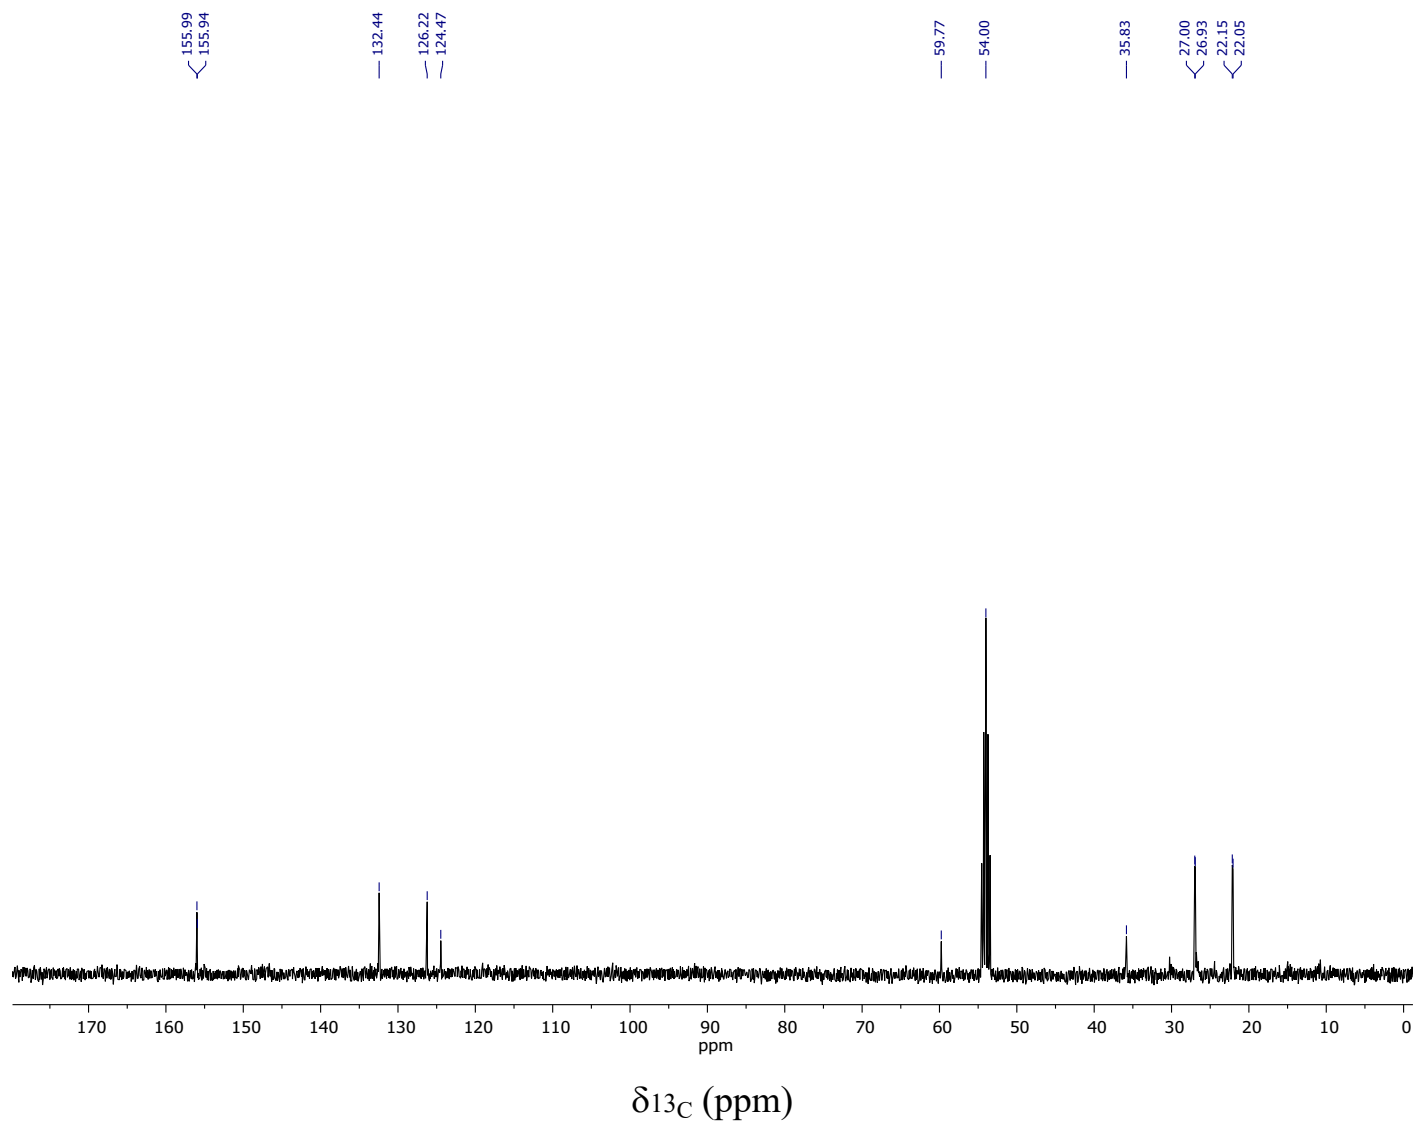

Figure S21. Solution  $^{13}\text{C}\{^1\text{H}\}$  NMR spectrum of the carboranosemiclatrochelate  $\text{Fe}(\text{HNx})_2\text{Nx}(\text{B4-C}_6\text{H}_4\text{COspCarb})$  in  $\text{CD}_2\text{Cl}_2$ .

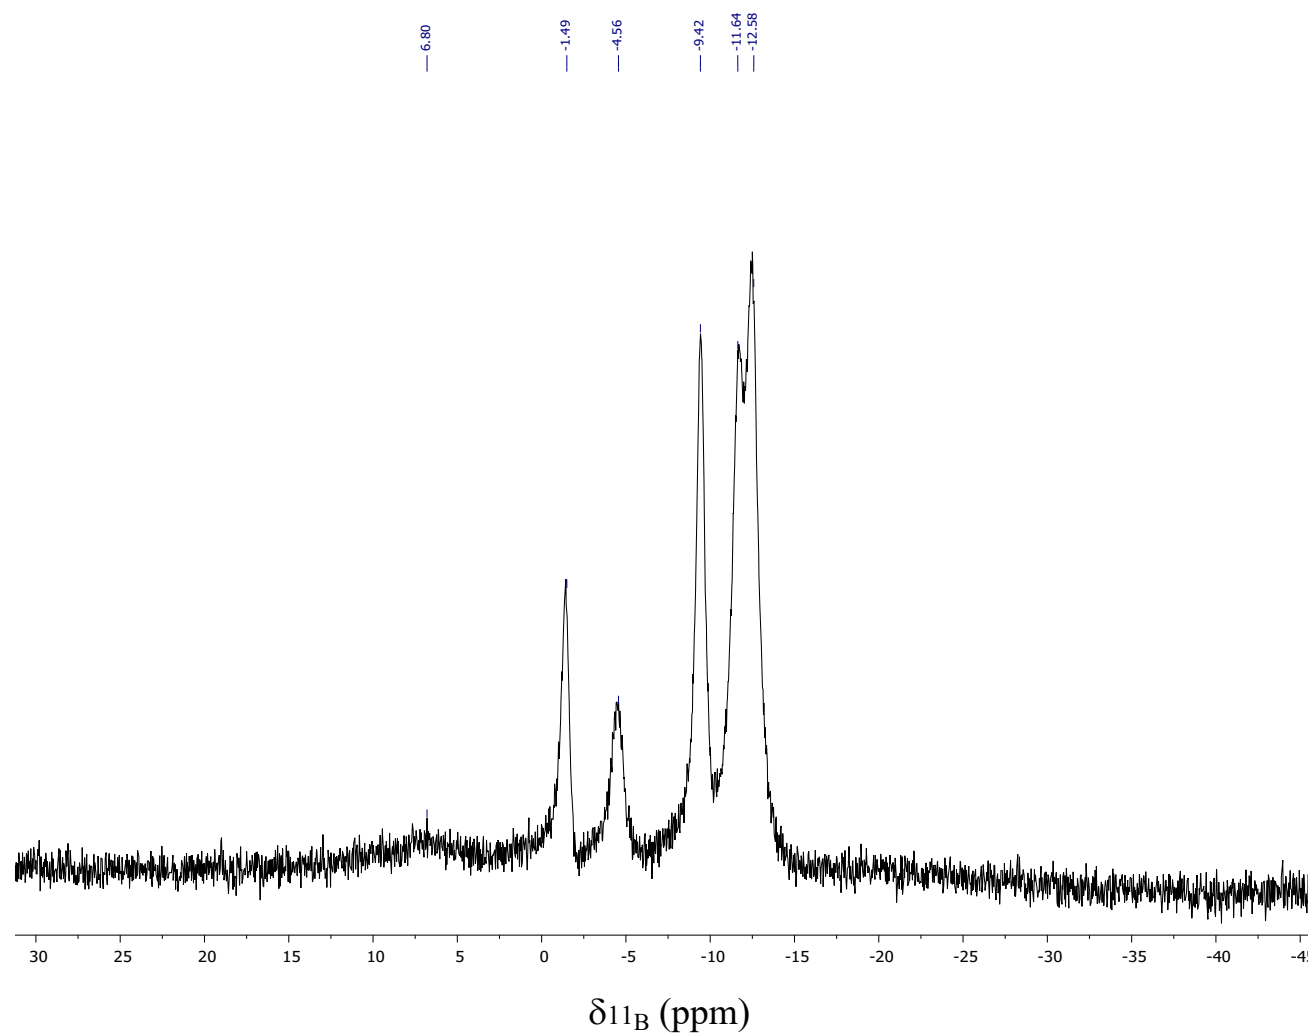

Figure S22. Fragment of the solution  $^{11}\text{B}\{^1\text{H}\}$  NMR spectrum of the carboranosemiclatrochelate  $\text{Fe}(\text{HNx})_2\text{Nx}(\text{B4-C}_6\text{H}_4\text{COspCarb})$  in  $\text{CD}_2\text{Cl}_2$ .

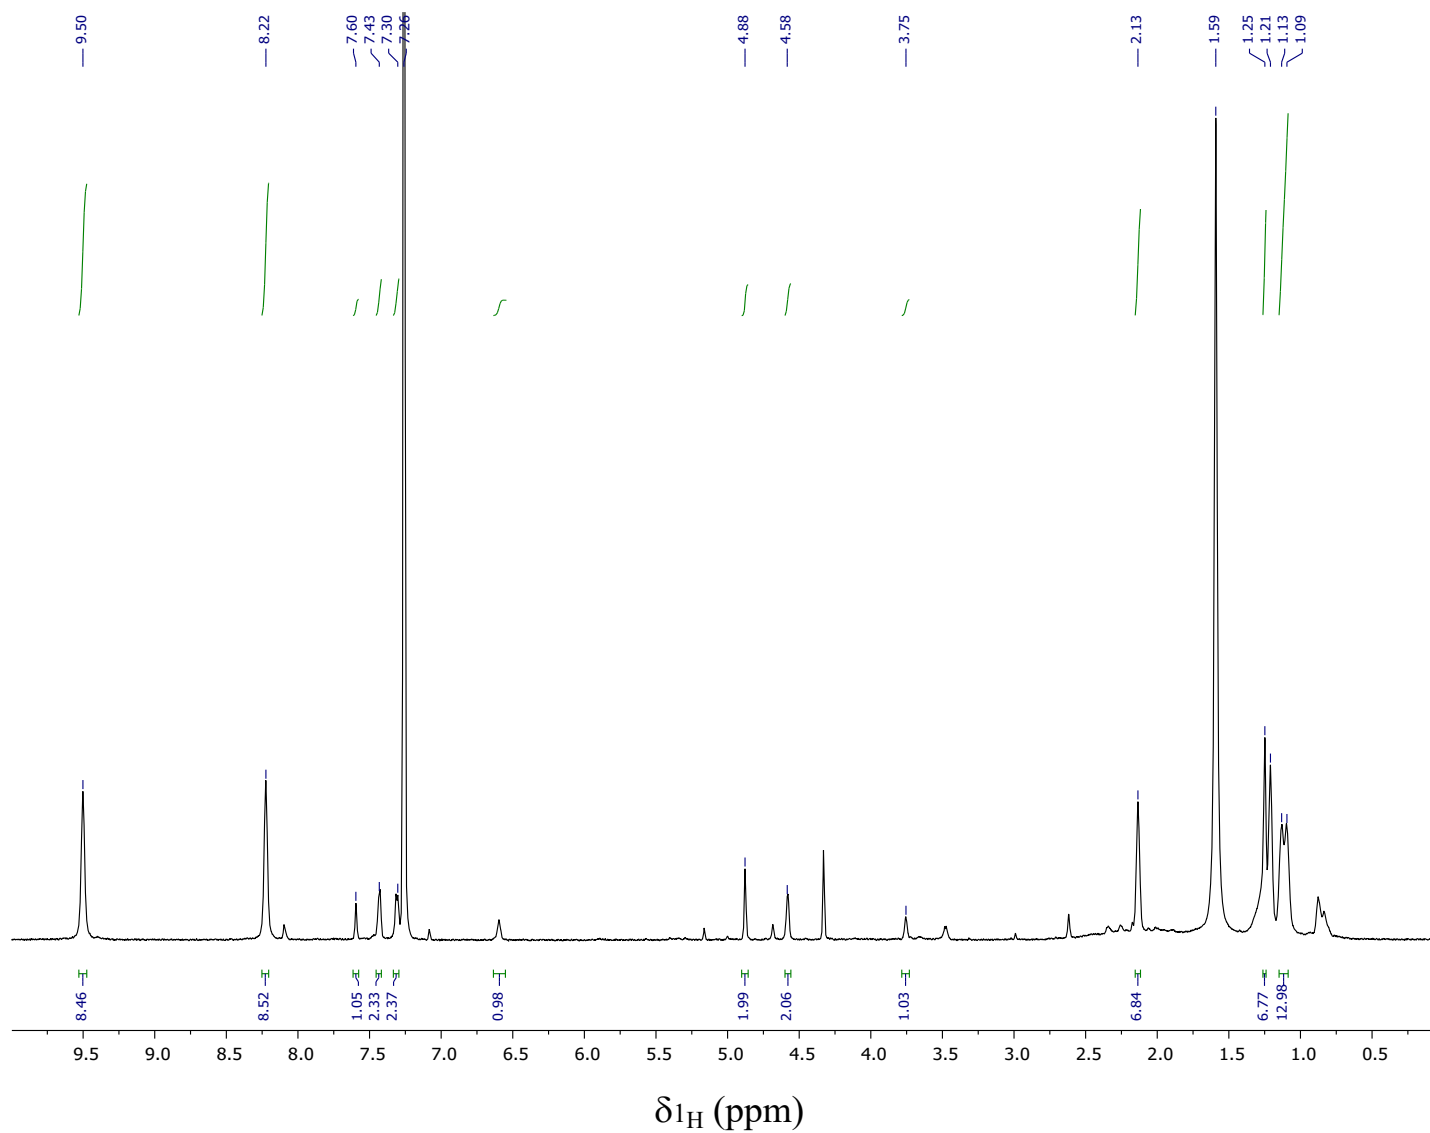

Figure S23. Solution  $^1\text{H}$  NMR spectrum of the polytopic complex  $\text{FeN}_x\text{}_3(\text{B4-C}_6\text{H}_4\text{COSpCarb})(\text{ZrPc})$  in  $\text{CDCl}_3$ .

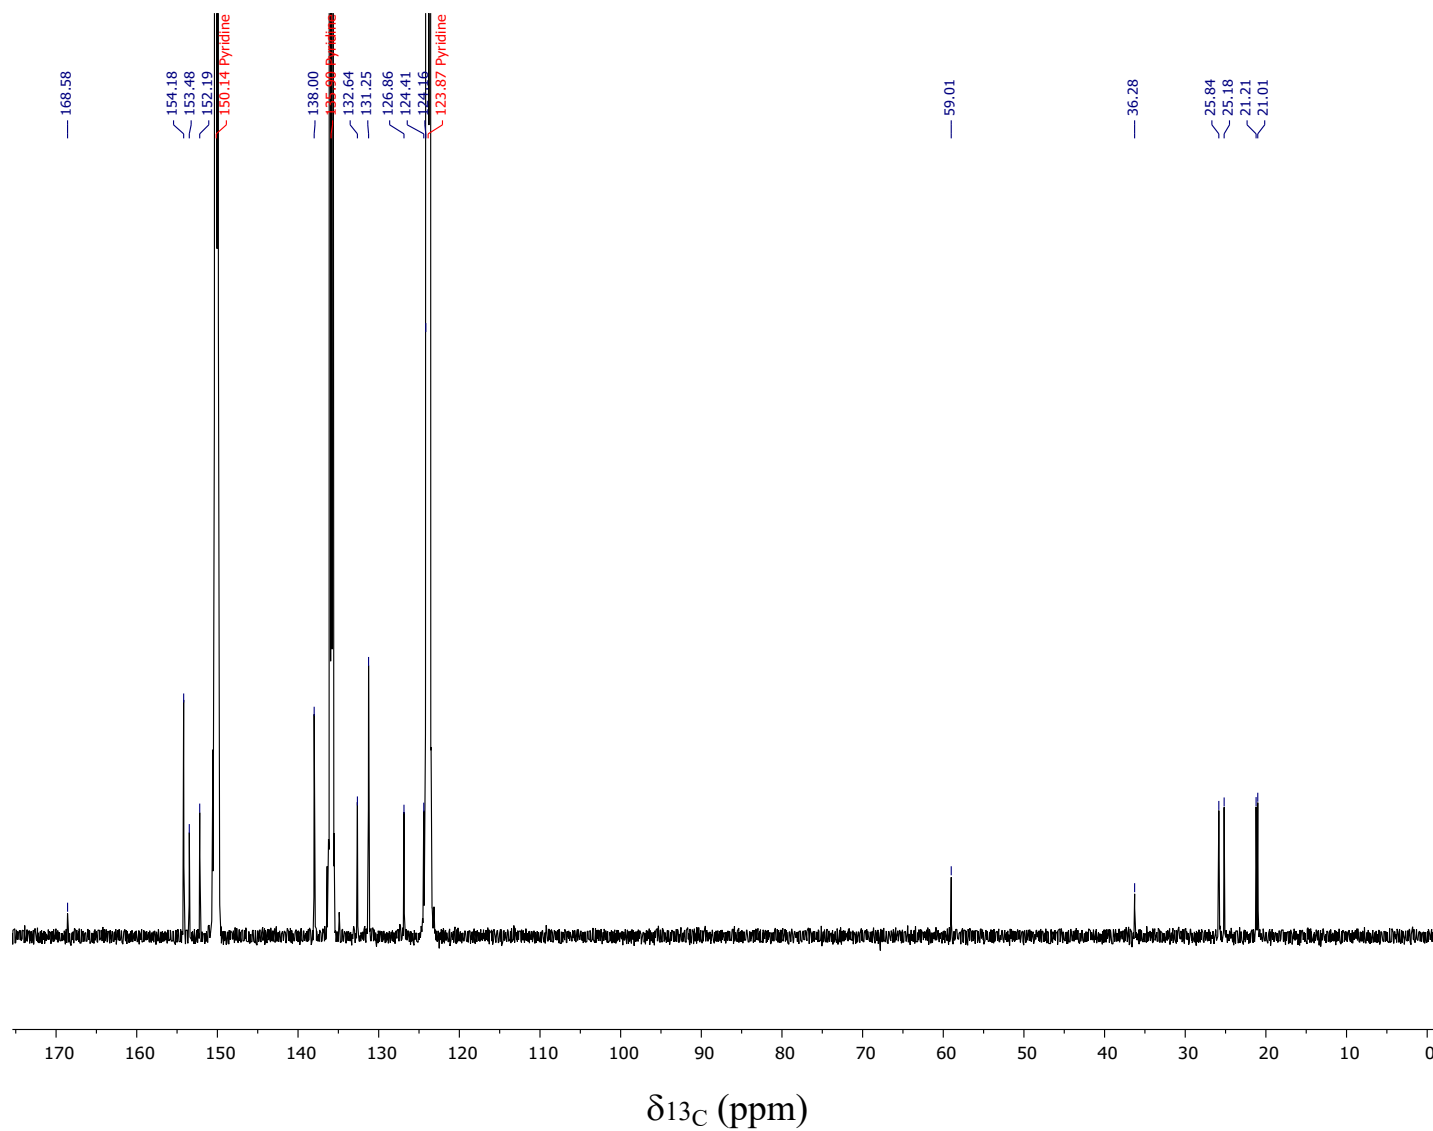

Figure S24. Solution  $^{13}\text{C}\{^1\text{H}\}$  NMR spectrum of the polytopic complex  $\text{FeN}_x\text{}_3(\text{B4-C}_6\text{H}_4\text{COSpCarb})(\text{ZrPc})$  in pyridine- $d_5$ .

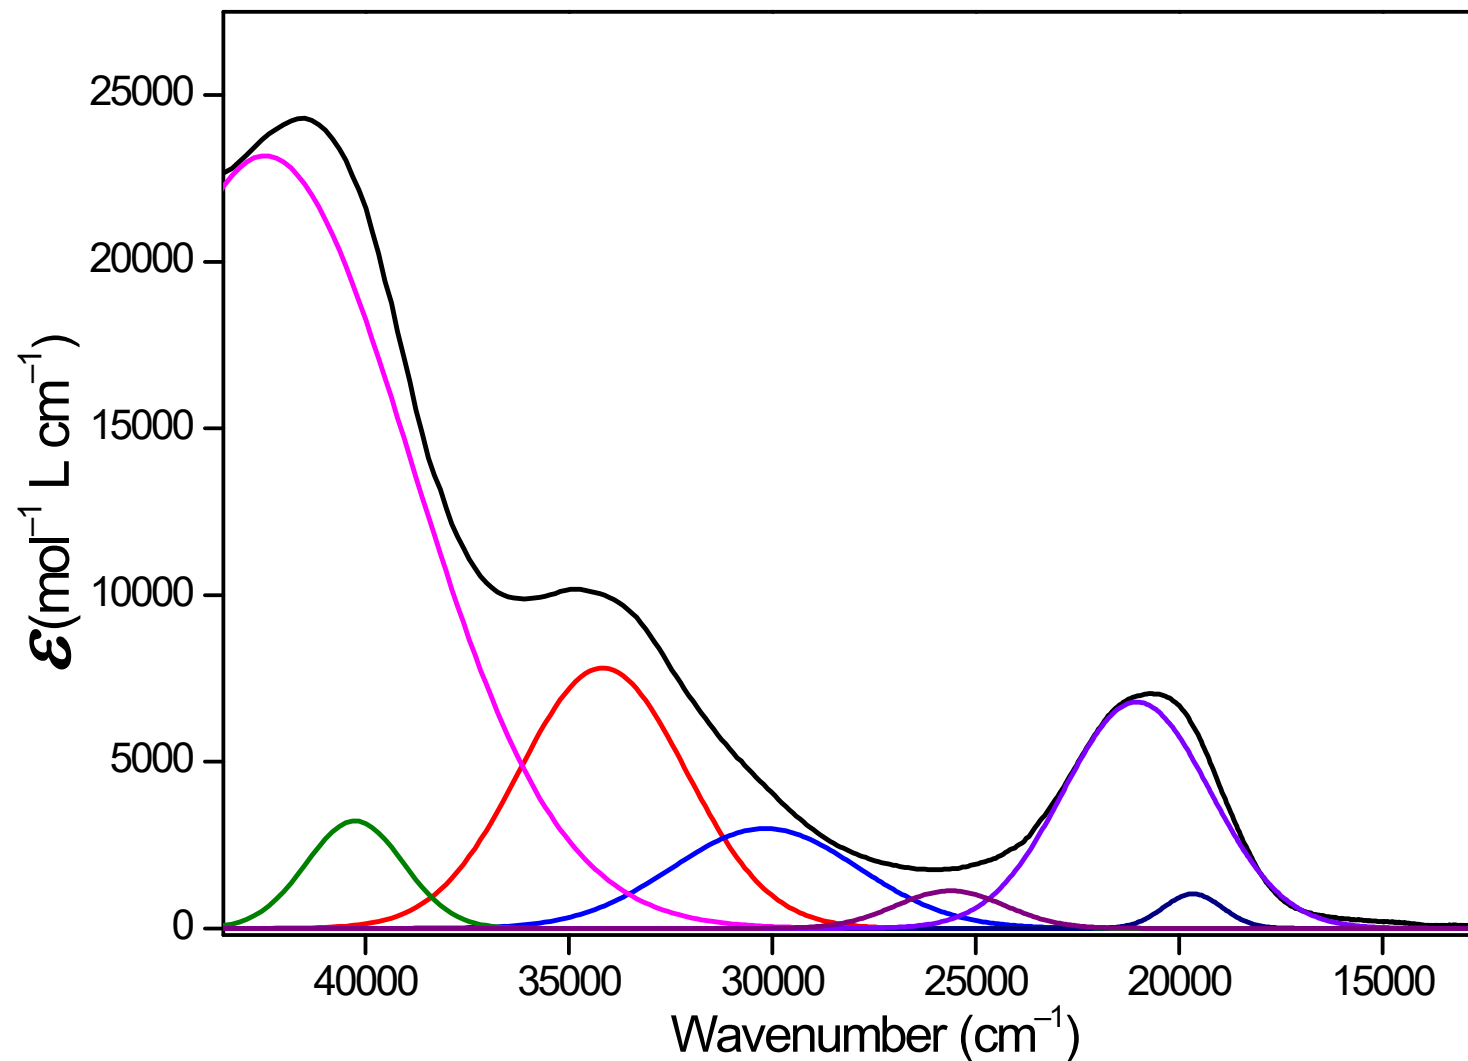

Figure S25. Solution UV-vis spectrum of the semiclathrochelate  $\text{FeN}_x(\text{HN}_x)_2(\text{B4-C}_6\text{H}_4\text{COOH})$  in  $\text{CH}_2\text{Cl}_2$  (shown in black line) and its deconvolution into the Gaussian components (shown in color lines).

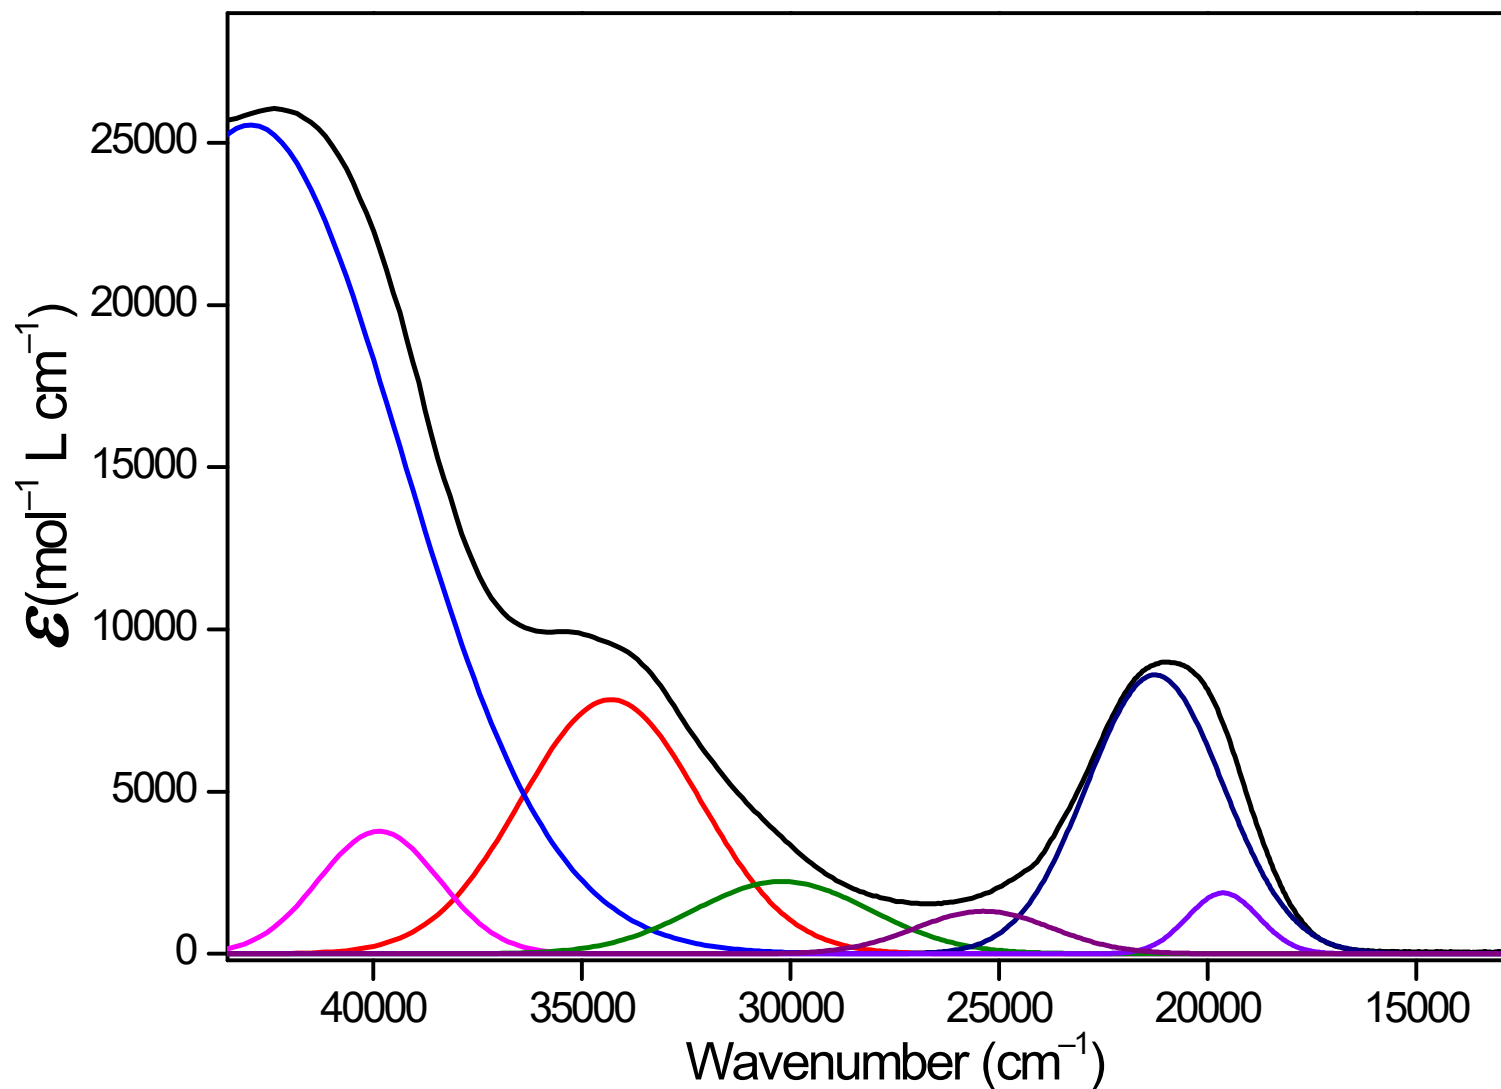

Figure S26. Solution UV-vis spectrum of the semiclathrochelate  $\text{FeN}_x(\text{HN}_x)_2(\text{B4-C}_6\text{H}_4\text{COProp})$  in  $\text{CH}_2\text{Cl}_2$  (shown in black line) and its deconvolution into the Gaussian components (shown in color lines).



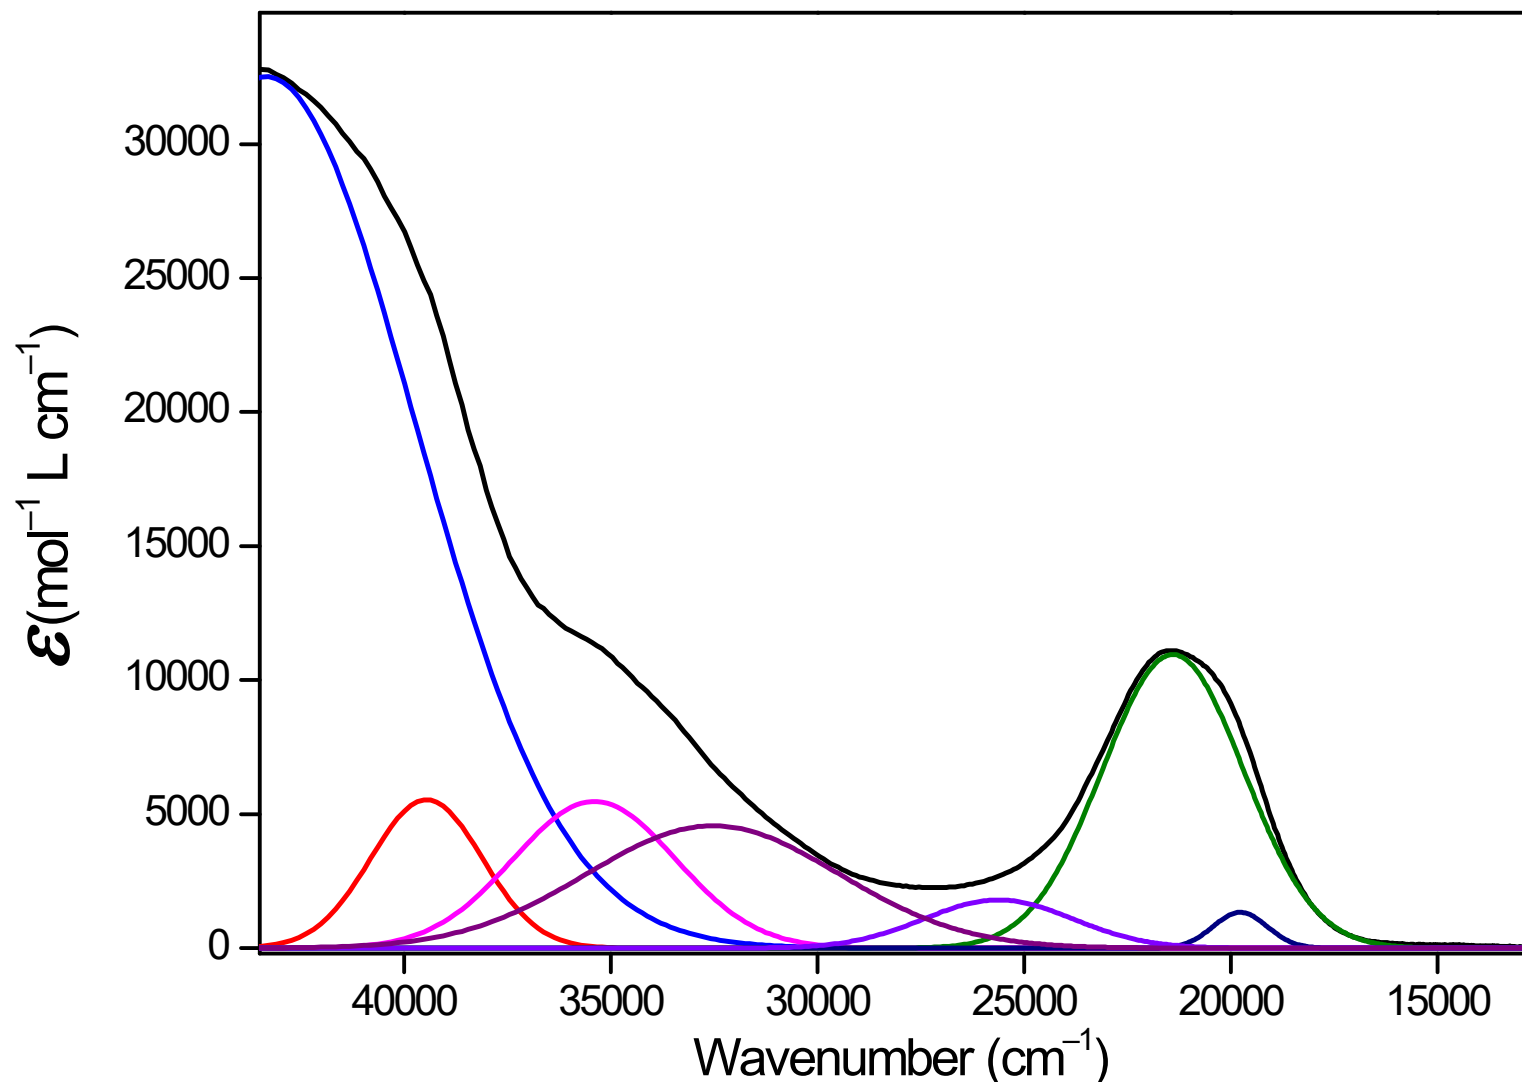

Figure S27. Solution UV-vis spectrum of the carboranosemiclathrochelate  $\text{FeN}_x(\text{HN}_x)_2(\text{B}_4\text{-C}_6\text{H}_4\text{COSpCarb})$  in  $\text{CH}_2\text{Cl}_2$  (shown in black line) and its deconvolution into the Gaussian components (shown in color lines).

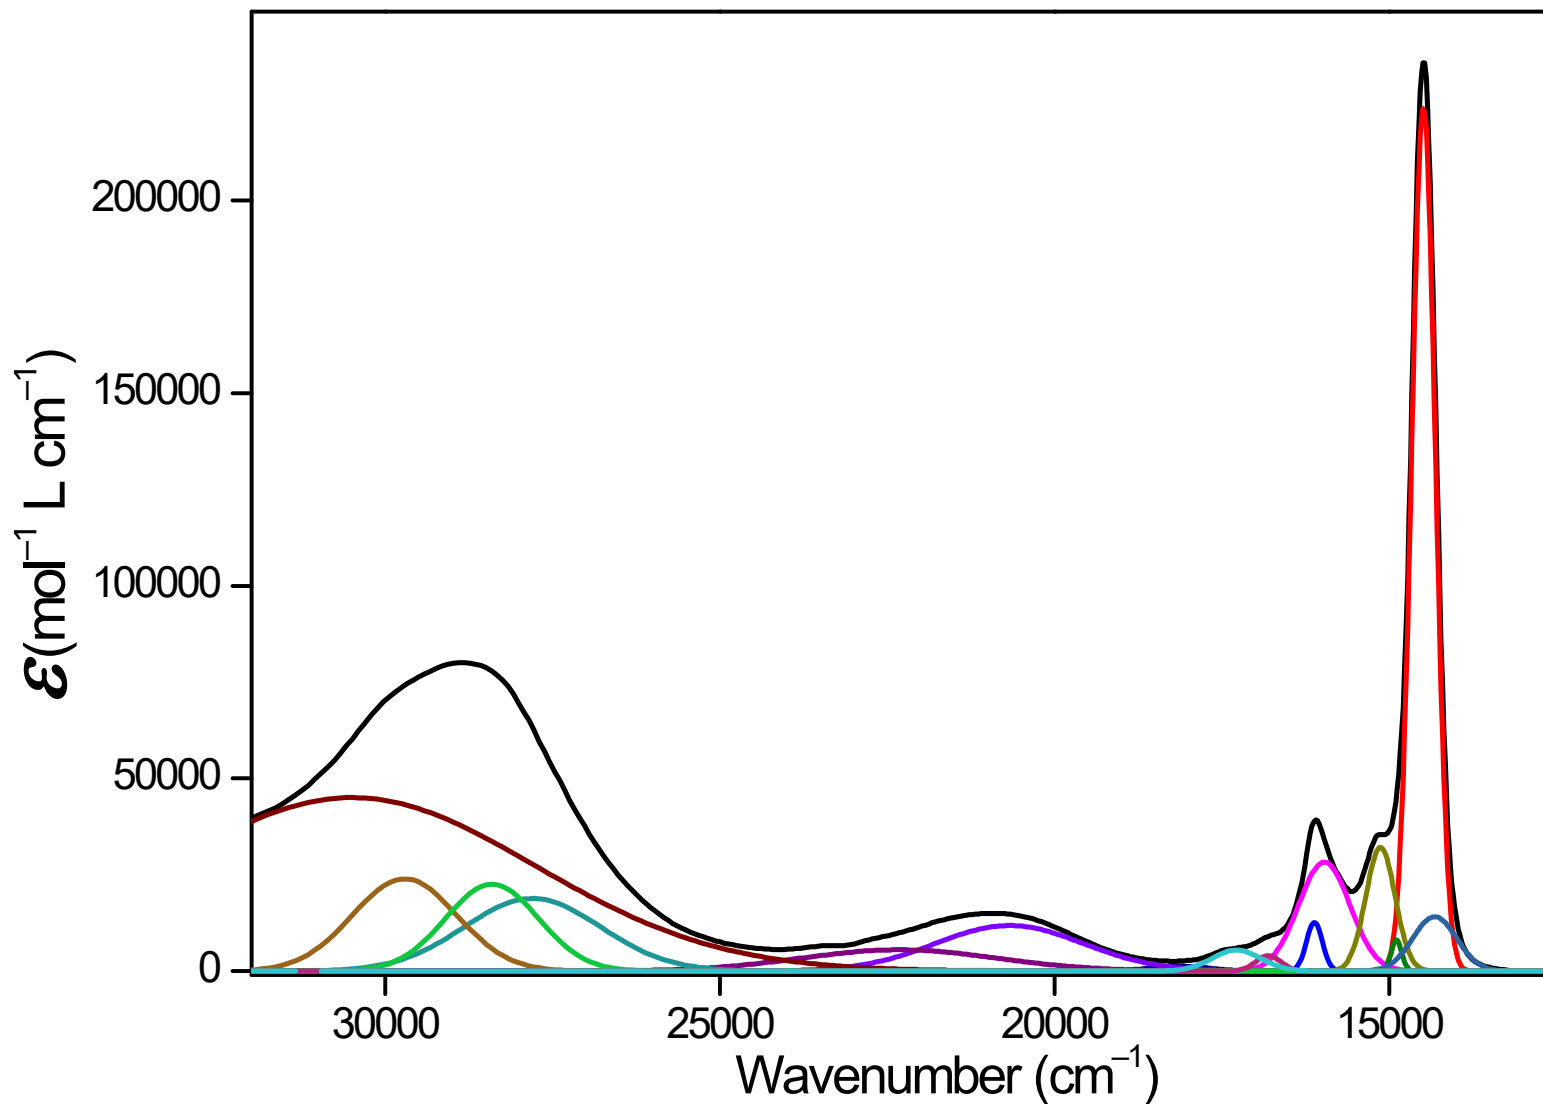

Figure S28. Solution UV-vis spectrum of the phthalocyaninatoclathrochelate  $\text{FeN}_x\text{}_3(\text{B4-C}_6\text{H}_4\text{COOH})(\text{ZrPc})$  in pyridine (shown in black line) and its deconvolution into the Gaussian components (shown in color lines).

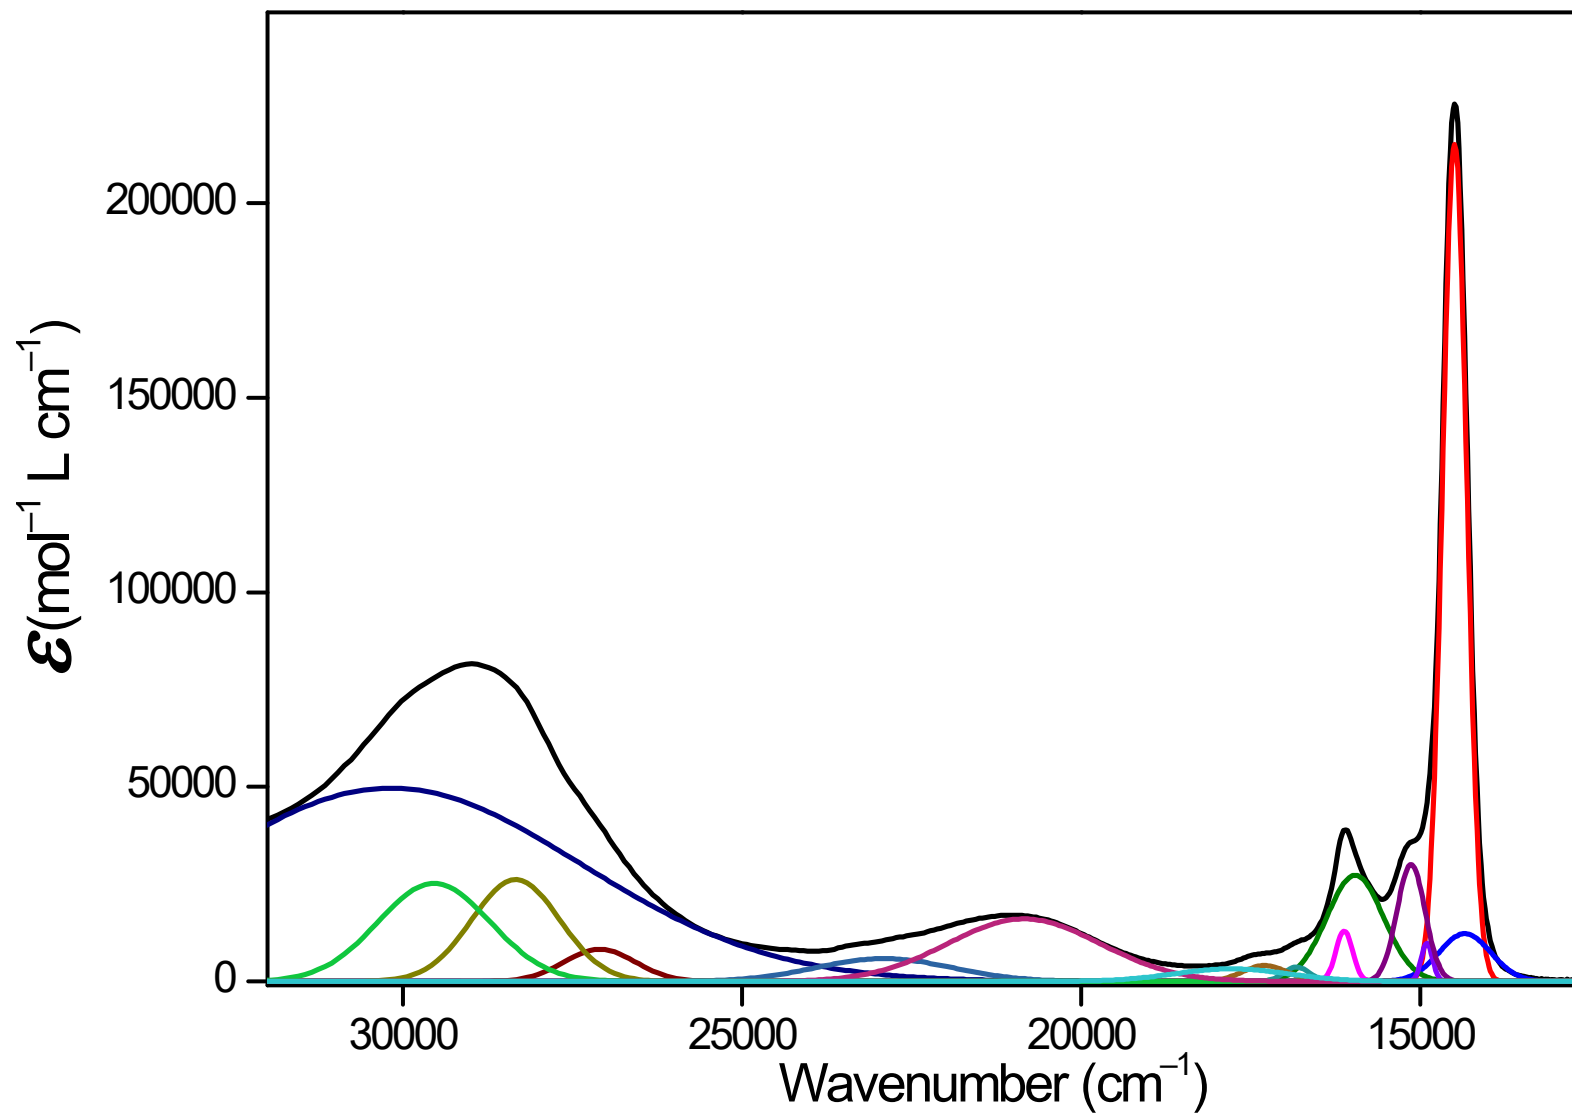

Figure S29. Solution UV-vis spectrum of the phthalocyaninatoclathrochelate  $\text{FeN}_x\text{}_3(\text{B4-C}_6\text{H}_4\text{COOH})(\text{HfPc})$  in pyridine (shown in black line) and its deconvolution into the Gaussian components (shown in color lines).

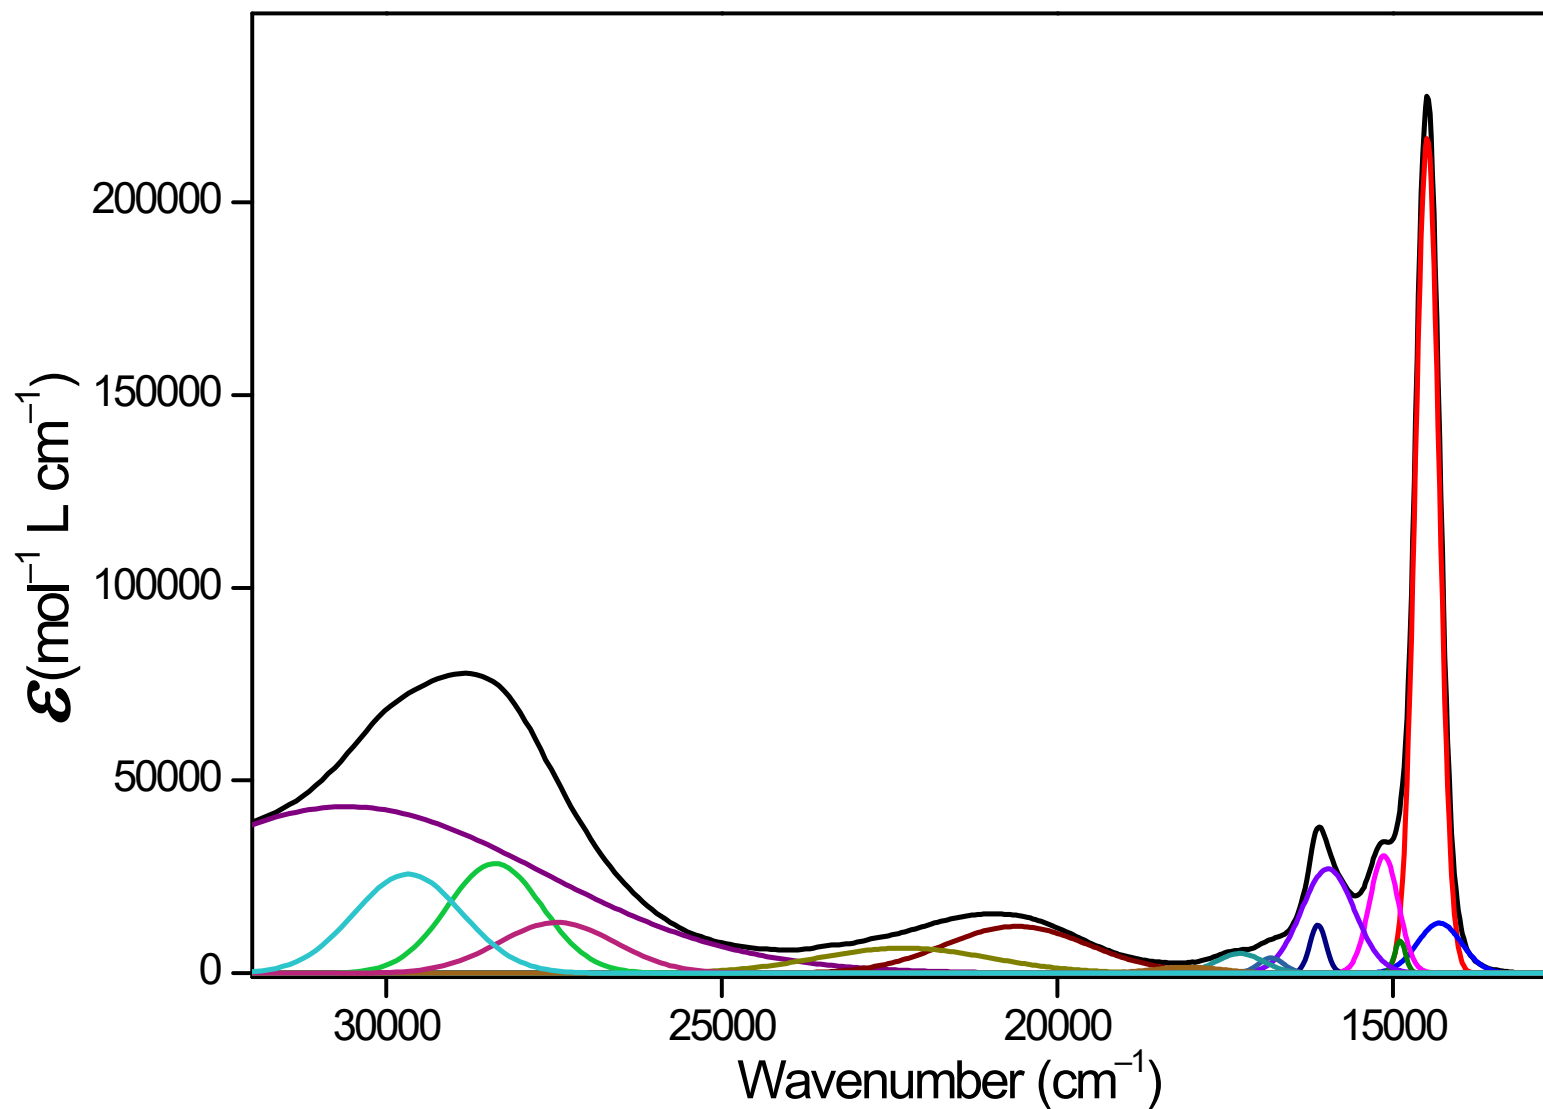

Figure S30. Solution UV-vis spectrum of the phthalocyaninatoclathrochelate  $\text{FeN}_x\text{}_3(\text{B4-C}_6\text{H}_4\text{COProp})(\text{ZrPc})$  in pyridine (shown in black line) and its deconvolution into the Gaussian components (shown in color lines).

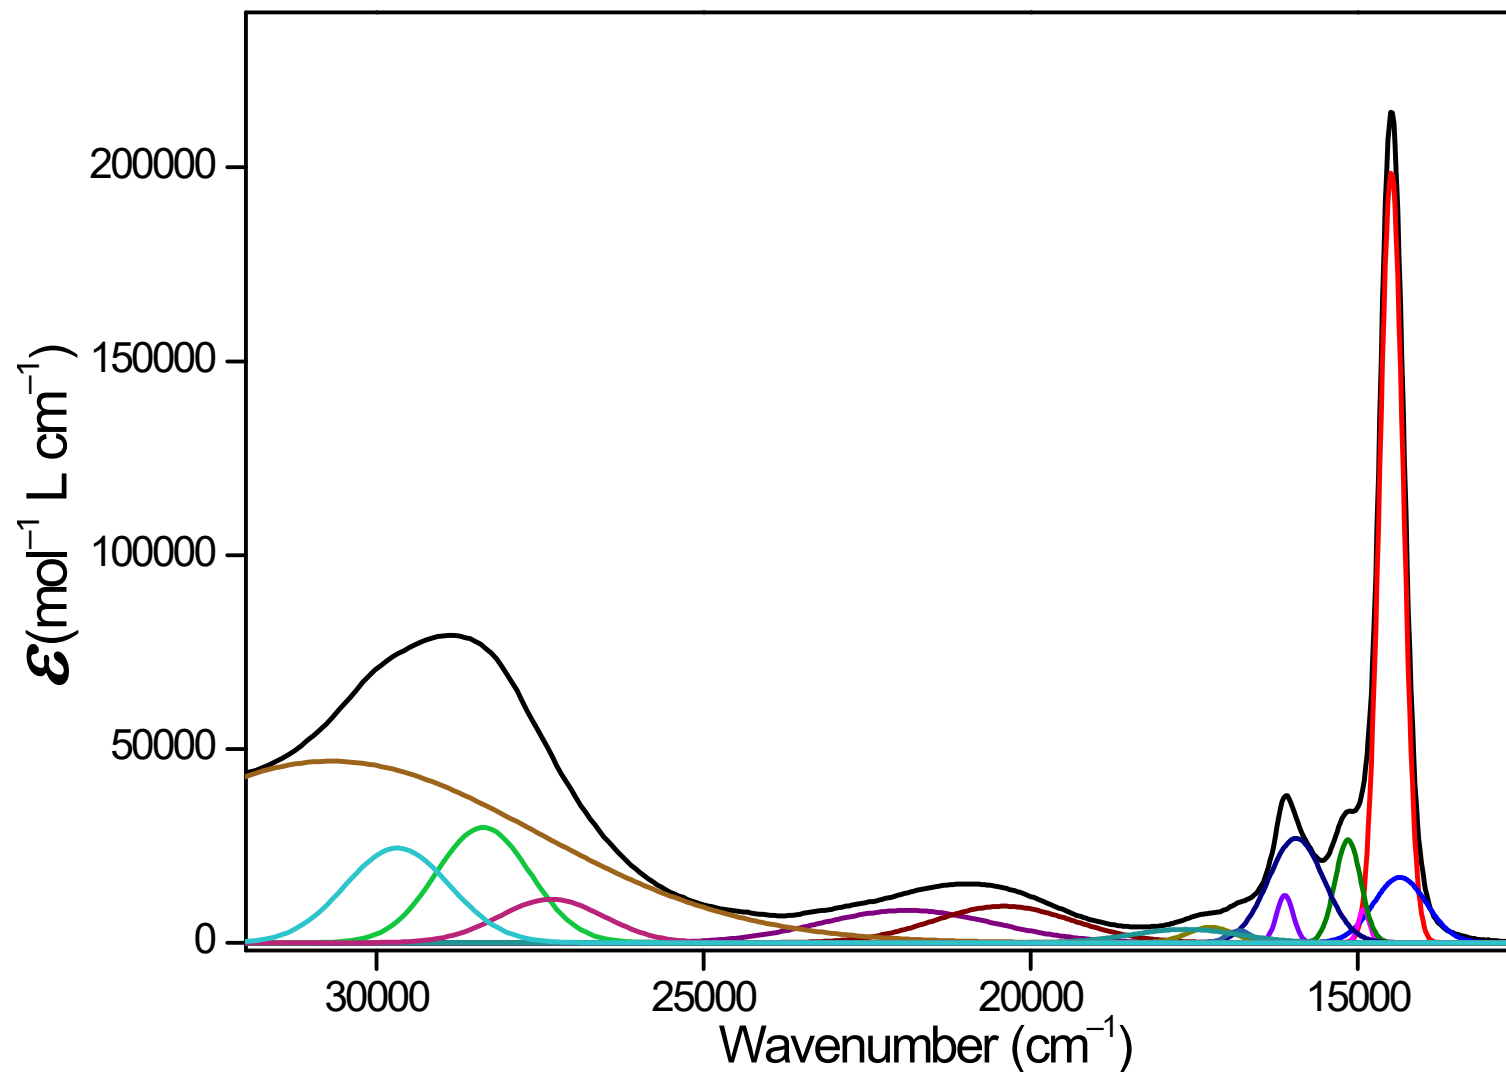

Figure S31. Solution UV-vis spectrum of the polytopic complex  $\text{FeN}_x\text{}_3(\text{B4-C}_6\text{H}_4\text{COspCarb})(\text{ZrPc})$  in pyridine (shown in black line) and its deconvolution into the Gaussian components (shown in color lines).

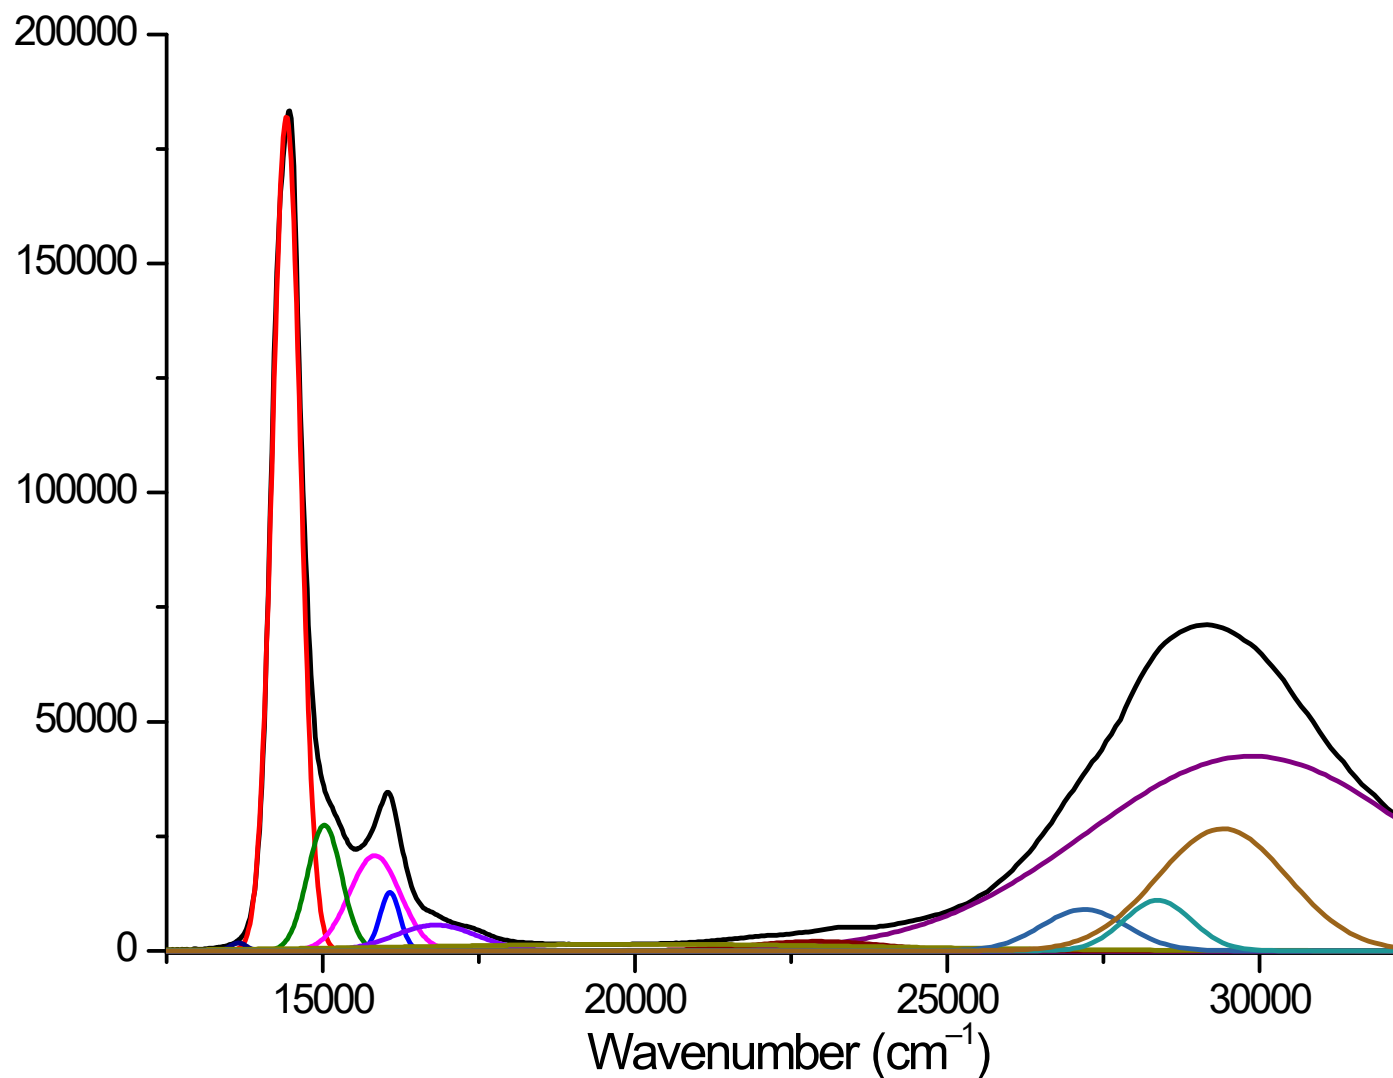

Figure S32. Solution UV-vis spectrum of the metallocomplex precursor HfPcCl<sub>2</sub> in pyridine (shown in black line) and its deconvolution into the Gaussian components (shown in color lines).

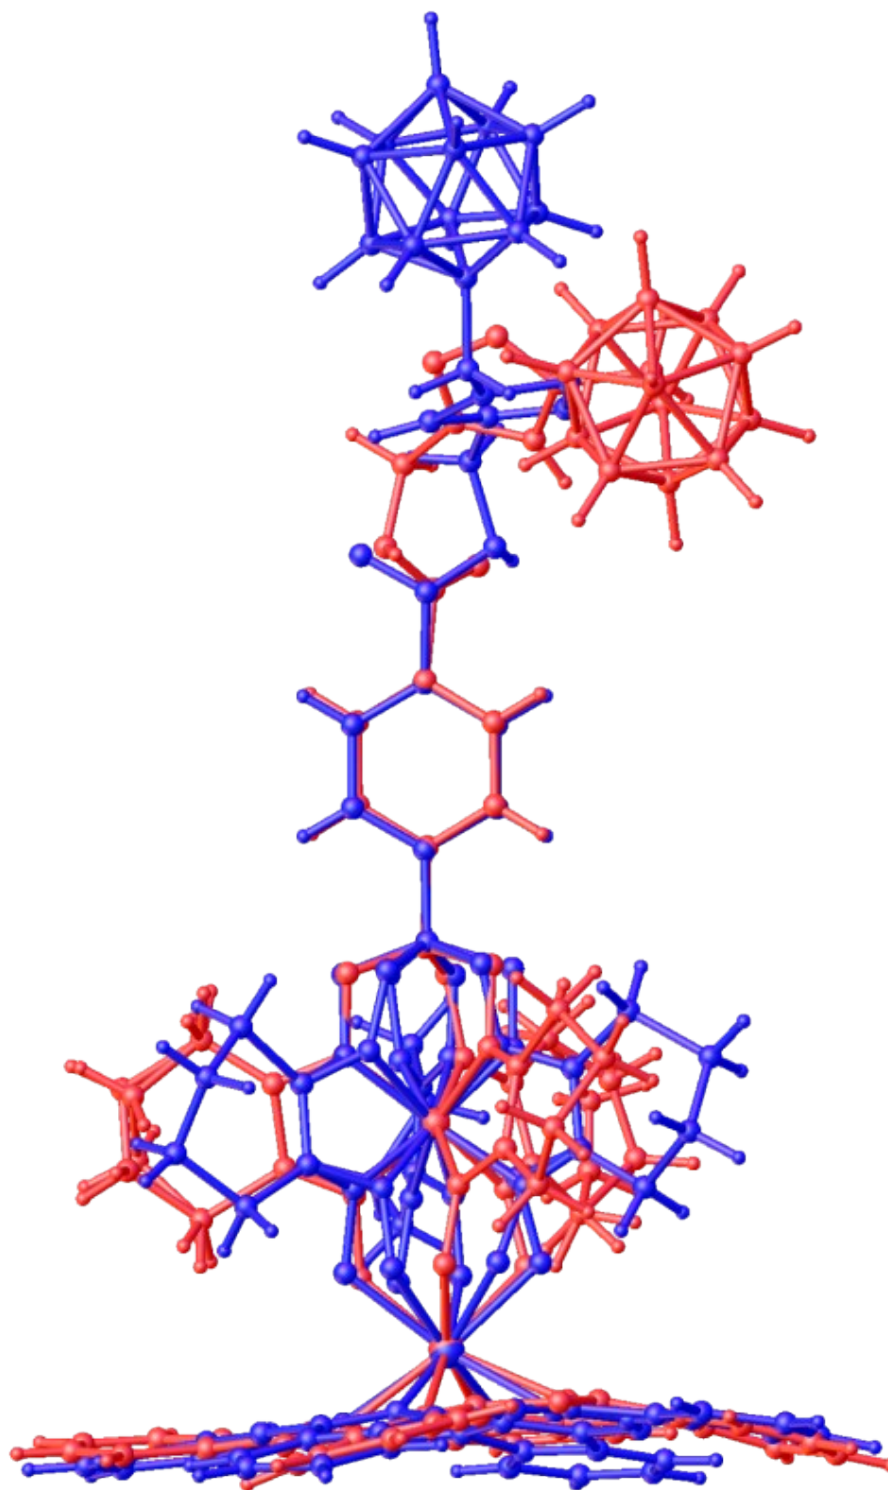

Figure S33. Comparison of the conformations of two symmetrically independent molecules of the polytopic carboranyl-terminated phthalocyaninatoclathrochelate  $\text{FeN}_x\text{}_3(\text{B}_4\text{-C}_6\text{H}_4\text{COSpCarb})(\text{ZrPc})$ ; their Zr, Fe and B atoms are overlaid.

**Table S1.** Solution UV-vis spectra ( $\nu$ ,  $\text{cm}^{-1}$ ,  $\epsilon \times 10^{-3}$ ,  $\text{mol}^{-1} \cdot \text{L} \cdot \text{cm}^{-1}$ ) of the obtained hybrid and polytopic iron(II) complexes

| Compound                                                            | $\nu_1$       | $\nu_2$       | $\nu_3$       | $\nu_4$        | $\nu_5$        | $\nu_6$        | $\nu_7$        | $\nu_8$        | $\nu_9$        | $\nu_{10}$    | $\nu_{11}$    | $\nu_{12}$    | $\nu_{13}$     | $\nu_{14}$     | $\nu_{15}$    |
|---------------------------------------------------------------------|---------------|---------------|---------------|----------------|----------------|----------------|----------------|----------------|----------------|---------------|---------------|---------------|----------------|----------------|---------------|
| FeNx <sub>3</sub> (B4-C <sub>6</sub> H <sub>4</sub> COOH)(ZrPc)     | 30501<br>(45) | 29714<br>(24) | 28408<br>(23) | 27802<br>(19)  | 22328<br>(5.5) | 20677<br>(12)  | 18131<br>(1.3) | 17284<br>(5.5) | 16809<br>(4.0) | 16120<br>(13) | 15973<br>(28) | 15132<br>(32) | 14893<br>(8.1) | 14489<br>(224) | 14322<br>(14) |
| FeNx <sub>3</sub> (B4-C <sub>6</sub> H <sub>4</sub> COOH)(HfPc)     | 30180<br>(50) | 29544<br>(25) | 28338<br>(26) | 27100<br>(8.3) | 22909<br>(5.9) | 20846<br>(16)  | 17788<br>(3.2) | 17293<br>(4.1) | 16824<br>(3.7) | 16123<br>(13) | 15961<br>(27) | 15137<br>(30) | 14904<br>(9.9) | 14494<br>(215) | 14343<br>(12) |
| FeNx <sub>3</sub> (B4-C <sub>6</sub> H <sub>4</sub> COProp)(ZrPc)   | 30598<br>(43) | 29676<br>(26) | 28384<br>(28) | 27454<br>(13)  | 22289<br>(6.5) | 20609<br>(12)  | 18057<br>(1.6) | 17282<br>(5.1) | 16814<br>(3.9) | 16119<br>(12) | 15969<br>(27) | 15135<br>(31) | 14895<br>(8.4) | 14490<br>(217) | 14307<br>(13) |
| FeNx <sub>3</sub> (B4-C <sub>6</sub> H <sub>4</sub> COSpCarb)(ZrPc) | 30690<br>(47) | 29682<br>(24) | 28373<br>(30) | 27326<br>(11)  | 21886<br>(8)   | 20419<br>(9.4) | 17638<br>(3.4) | 17255<br>(4.0) | 16812<br>(3.1) | 16115<br>(12) | 15943<br>(27) | 15150<br>(27) | 14908<br>(8.7) | 14485<br>(200) | 14354<br>(17) |



**Table S2.** Solution UV-vis spectra ( $\nu$ ,  $\text{cm}^{-1}$ ,  $\epsilon \times 10^{-3}$ ,  $\text{mol}^{-1} \cdot \text{L} \cdot \text{cm}^{-1}$ ) of the obtained iron(II) semiclatrochelates and that of a model carborane-based compound.

| Compound                                                               | $\nu_1$        | $\nu_2$         | $\nu_3$        | $\nu_4$        | $\nu_5$        | $\nu_6$        | $\nu_7$        |
|------------------------------------------------------------------------|----------------|-----------------|----------------|----------------|----------------|----------------|----------------|
| FeNx(HNx) <sub>2</sub> (B4-C <sub>6</sub> H <sub>4</sub> COOH)         | 42475<br>(23)  | 40264<br>(3.2)  | 34171<br>(7.8) | 30173<br>(3.0) | 25620<br>(1.1) | 21039<br>(6.8) | 19661<br>(1.0) |
| FeNx(HNx) <sub>2</sub> (B4-C <sub>6</sub> H <sub>4</sub> COProp)       | 42949<br>(26)  | 39866<br>(3.8)  | 34311<br>(7.8) | 30199<br>(2.2) | 25365<br>(1.3) | 21259<br>(8.6) | 19628<br>(1.9) |
| FeNx(HNx) <sub>2</sub> (B4-C <sub>6</sub> H <sub>4</sub> COSpCarb)     | 43343<br>(33)  | 39462<br>(5.5)  | 35403<br>(5.5) | 32533<br>(4.6) | 25625<br>(1.8) | 21399<br>(11)  | 19773<br>(1.3) |
| 1-[( <i>o</i> -carboran-1'-yl)methyl]-<br>4-pentyl-1,2,3-triazole [S7] | 45454<br>(3.7) | 37879<br>(0.08) |                |                |                |                |                |

Table S3. Crystallographic data and structure refinement details for the semiclathrochelate, hybrid and polytopic iron(II) complexes under study

| Compound                                     | Fe(HNx) <sub>2</sub> Nx(B4-C <sub>6</sub> H <sub>4</sub> COOH)                   | Fe(HNx) <sub>2</sub> Nx(B4-C <sub>6</sub> H <sub>4</sub> COProp) | FeNx <sub>3</sub> (B4-C <sub>6</sub> H <sub>4</sub> COOH)(ZrPc) · 2.5C <sub>6</sub> H <sub>6</sub> | (d <sub>5</sub> -Py·H) <sup>+</sup> [FeNx <sub>3</sub> (B4-C <sub>6</sub> H <sub>4</sub> COO <sup>-</sup> )(HfPc)] · 2d <sub>5</sub> -Py | FeNx <sub>3</sub> (B4-C <sub>6</sub> H <sub>4</sub> COProp)(ZrPc) · 1.5CH <sub>2</sub> Cl <sub>2</sub> | FeNx <sub>3</sub> (B4-C <sub>6</sub> H <sub>4</sub> COSpCarb)(ZrPc)                 |
|----------------------------------------------|----------------------------------------------------------------------------------|------------------------------------------------------------------|----------------------------------------------------------------------------------------------------|------------------------------------------------------------------------------------------------------------------------------------------|--------------------------------------------------------------------------------------------------------|-------------------------------------------------------------------------------------|
| Formula                                      | C <sub>26</sub> H <sub>33</sub> BCl <sub>2</sub> FeN <sub>6</sub> O <sub>8</sub> | C <sub>28</sub> H <sub>34</sub> BFeN <sub>7</sub> O <sub>7</sub> | C <sub>72</sub> H <sub>60</sub> BFeN <sub>14</sub> O <sub>8</sub> Zr                               | C <sub>72</sub> H <sub>44</sub> BD <sub>16</sub> FeHfN <sub>17</sub> O <sub>8</sub>                                                      | C <sub>61.5</sub> H <sub>51</sub> BCl <sub>3</sub> FeN <sub>15</sub> O <sub>7</sub> Zr                 | C <sub>63</sub> H <sub>61</sub> B <sub>11</sub> FeN <sub>18</sub> O <sub>7</sub> Zr |
| Fw                                           | 695.14                                                                           | 647.28                                                           | 1407.22                                                                                            | 1552.61                                                                                                                                  | 1376.40                                                                                                | 1448.27                                                                             |
| Crystal system                               | Triclinic                                                                        | Triclinic                                                        | Triclinic                                                                                          | Triclinic                                                                                                                                | Monoclinic                                                                                             | Triclinic                                                                           |
| Space group                                  | <i>P</i> − <i>I</i>                                                              | <i>P</i> − <i>I</i>                                              | <i>P</i> − <i>I</i>                                                                                | <i>P</i> − <i>I</i>                                                                                                                      | <i>P</i> 2 <sub>1</sub> / <i>n</i>                                                                     | <i>P</i> − <i>I</i>                                                                 |
| a (Å)                                        | 9.757(2)                                                                         | 9.970(2)                                                         | 12.236(3)                                                                                          | 14.080(3)                                                                                                                                | 14.242(3)                                                                                              | 19.422(4)                                                                           |
| b (Å)                                        | 10.204(2)                                                                        | 11.030(2)                                                        | 12.862(3)                                                                                          | 16.520(3)                                                                                                                                | 17.942(4)                                                                                              | 20.591(4)                                                                           |
| c (Å)                                        | 16.040(3)                                                                        | 13.310(3)                                                        | 23.178(5)                                                                                          | 17.020(3)                                                                                                                                | 23.090(5)                                                                                              | 21.089(4)                                                                           |
| α (deg)                                      | 78.968(4)                                                                        | 87.32(3)                                                         | 90.70(3)                                                                                           | 73.19(3)                                                                                                                                 | 90                                                                                                     | 71.88(3)                                                                            |
| β (deg)                                      | 77.178(4)                                                                        | 88.96(3)                                                         | 93.99(3)                                                                                           | 87.98(3)                                                                                                                                 | 93.33(3)                                                                                               | 69.88(3)                                                                            |
| γ (deg)                                      | 73.981(5)                                                                        | 78.04(3)                                                         | 106.72(3)                                                                                          | 64.78(3)                                                                                                                                 | 90                                                                                                     | 87.44(3)                                                                            |
| Volume (Å <sup>3</sup> )                     | 1482.1(5)                                                                        | 1430.3(5)                                                        | 3483.1(13)                                                                                         | 3410.8(15)                                                                                                                               | 5890(2)                                                                                                | 7508(3)                                                                             |
| Z                                            | 2                                                                                | 2                                                                | 2                                                                                                  | 2                                                                                                                                        | 4                                                                                                      | 4                                                                                   |
| ρ <sub>calc</sub> (g/cm <sup>3</sup> )       | 1.558                                                                            | 1.503                                                            | 1.342                                                                                              | 1.512                                                                                                                                    | 1.552                                                                                                  | 1.281                                                                               |
| μ (mm <sup>-1</sup> )                        | 0.749                                                                            | 0.663                                                            | 0.478                                                                                              | 2.018                                                                                                                                    | 0.712                                                                                                  | 0.444                                                                               |
| F(000)                                       | 720                                                                              | 676                                                              | 1450                                                                                               | 1556                                                                                                                                     | 2812                                                                                                   | 2968                                                                                |
| Refls. collected                             | 20425                                                                            | 32478                                                            | 52706                                                                                              | 33975                                                                                                                                    | 34977                                                                                                  | 27240                                                                               |
| R <sub>int</sub>                             | 0.110                                                                            | 0.030                                                            | 0.066                                                                                              | 0.063                                                                                                                                    | 0.068                                                                                                  | 0.151                                                                               |
| Data / restraints / parameters               | 9051 / 0 / 367                                                                   | 7487 / 0 / 396                                                   | 19204 / 42 / 903                                                                                   | 12067 / 36 / 897                                                                                                                         | 12892 / 19 / 821                                                                                       | 8746 / 1013 / 1419                                                                  |
| Goodness-of-fit on F <sup>2</sup>            | 0.999                                                                            | 1.06                                                             | 1.06                                                                                               | 1.04                                                                                                                                     | 1.06                                                                                                   | 1.63                                                                                |
| R <sub>1</sub> [I>=2σ(I)]                    | 0.082                                                                            | 0.042                                                            | 0.060                                                                                              | 0.050                                                                                                                                    | 0.074                                                                                                  | 0.109                                                                               |
| wR2 [all data]                               | 0.178                                                                            | 0.110                                                            | 0.147                                                                                              | 0.114                                                                                                                                    | 0.194                                                                                                  | 0.209                                                                               |
| Largest diff. peak/hole (e Å <sup>-3</sup> ) | 0.990 / −0.541                                                                   | 0.638 / −0.684                                                   | 1.317 / −1.678                                                                                     | 2.695 / −1.659                                                                                                                           | 2.348 / −1.957                                                                                         | 0.590 / −1.093                                                                      |

### Supporting Information References

- [S1] Y.Z.Voloshin, N.A.Kostromina, R.Krämer, *Clathrochelates: Synthesis, Structure and Properties*, Elsevier, 2002 and references therein.
- [S2] Y.Z. Voloshin, E.V. Polshin, A.Y. Nazarenko, *Hyperfine Inter.* 2002, **141**, 309–320 and references therein.
- [S3] Y.Z. Voloshin, O.A. Varzatskii, T.E. Kron, V.K. Belsky, V.E. Zavodnik, N.G. Strizhakova, A.V. Palchik, *Inorg.Chem.*, 2000, **39**, 1907–1918.
- [S4] Y.Z. Voloshin, V.E. Zavodnik, O.A. Varzatskii, V.K. Belsky, A.V. Palchik, N.G. Strizhakova, I.I. Vorontsov, M.Y. Antipin, *Dalton Trans.* 2002, 1193–1202.
- [S5] S.C. Bart, K. Chłopek, E. Bill, M.W. Bouwkamp, E. Lobkovsky, F. Neese, K. Wieghardt, P.J. Chirik, *J. Am. Chem. Soc.* 2006, **128**, 13921 – 13912.
- [S6] S. Pillet, V. Legrand, H.-P. Weber, M. Souhassou, J.-F. Létard, P. Guionneau, C. Lecomte, *Z. Kristallogr.*, 2008, **223**, 235–249.
- [S7] G.E.Zelinskii, I.P.Limarev, A.V.Vologzhanina, V.A.Olshevskaya, A.V.Makarenkov, P.V.Dorovatovskii, A.S.Chuprin, M.A.Vershinin, S.V.Dudkin, Y.Z. Voloshin, *Molecules*. 2021, **26**, 3635.
